# Supplementary material for: Determinants of the urinary and serum metabolome in children from six European populations
Source: Springer Nature journal article supplement (doi:10.1186/s12916-018-1190-8), 2018-11-05

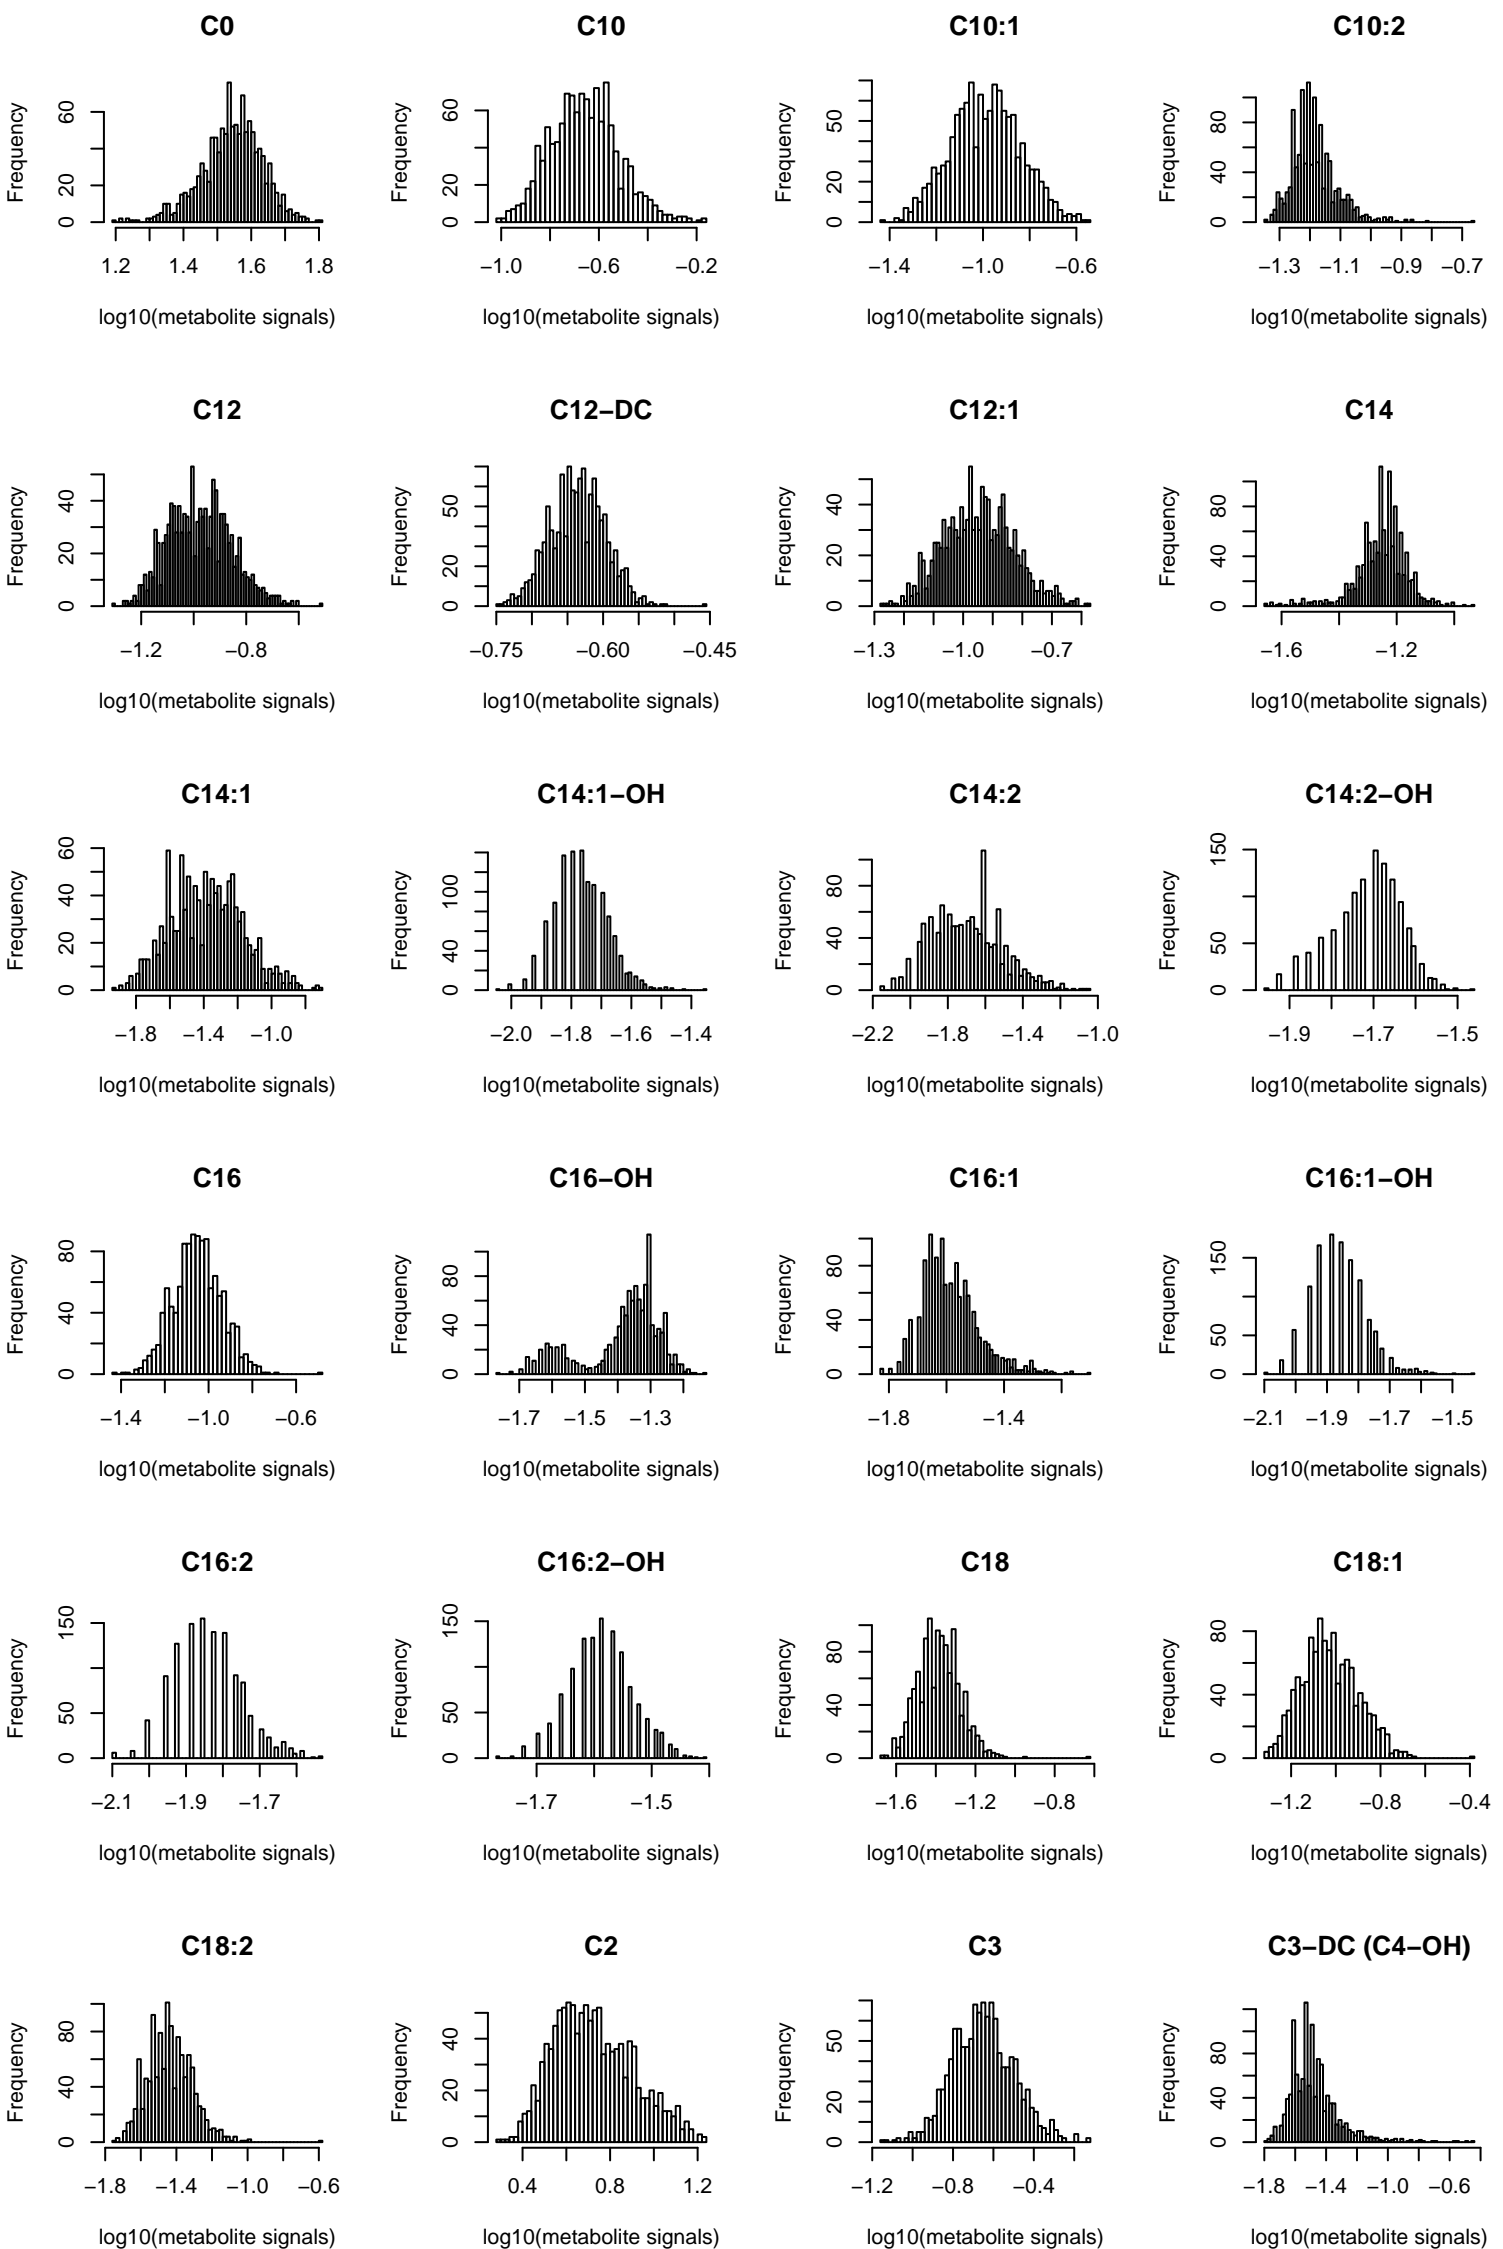

**C3-OH**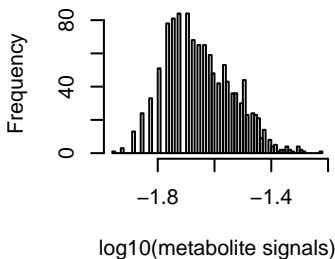**C4**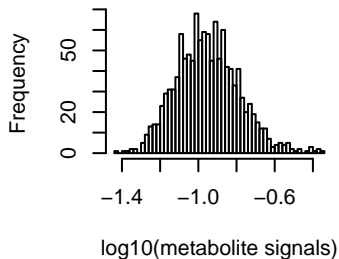**C4:1**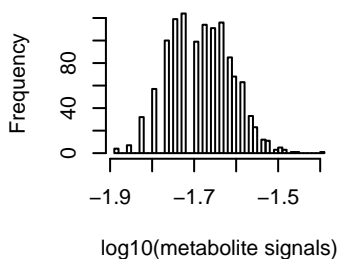**C6 (C4:1-DC)**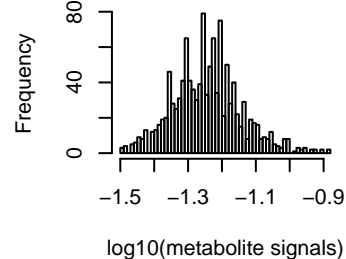**C5**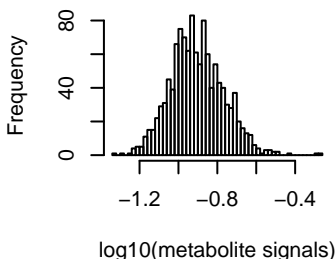**C5-M-DC**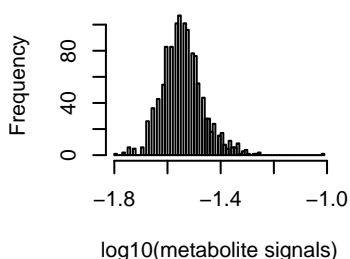**C5-OH (C3-DC-M)**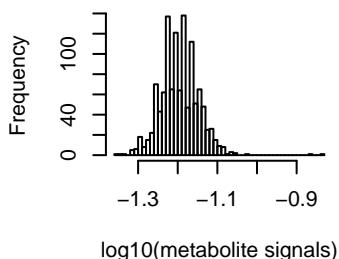**C5:1**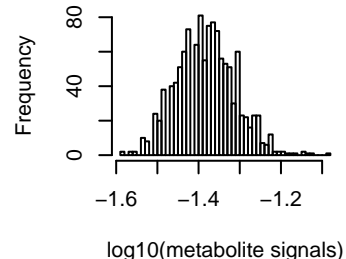**C5:1-DC**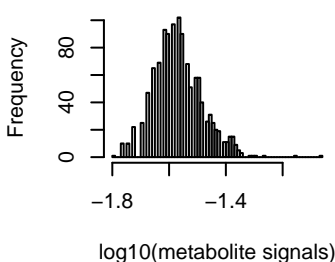**C5-DC (C6-OH)**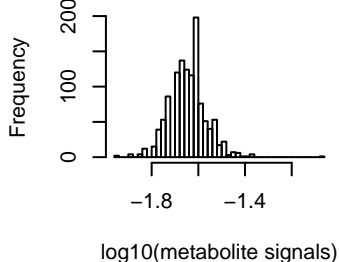**C6:1**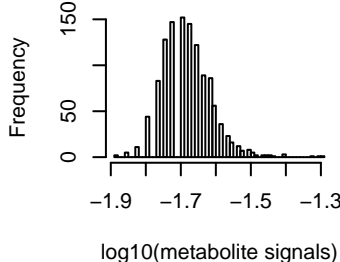**C7-DC**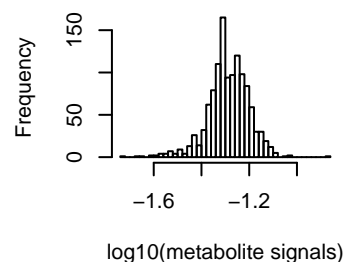**C8**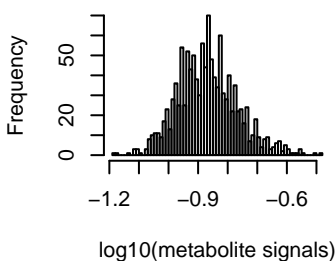**C9**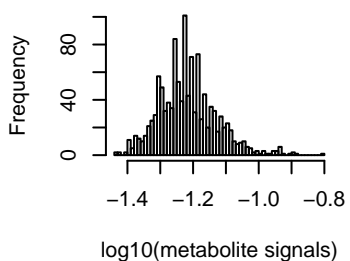**Ala**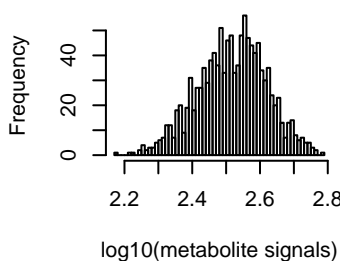**Arg**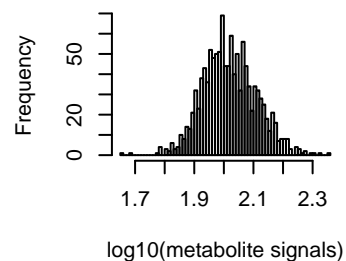**Asn**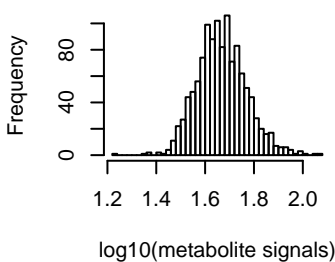**Asp**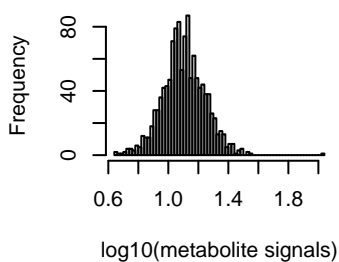**Cit**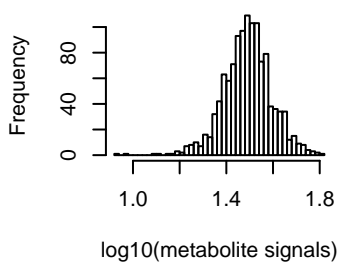**Gln**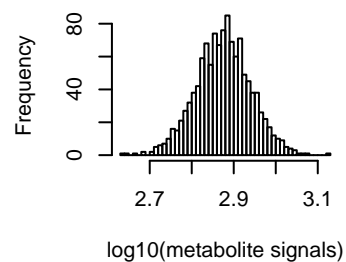**Glu**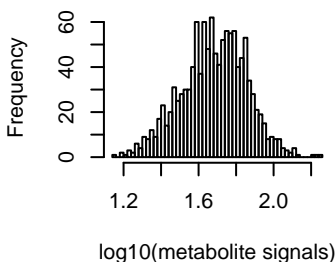**Gly**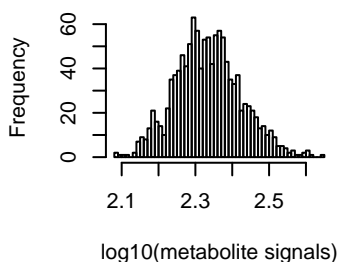**His**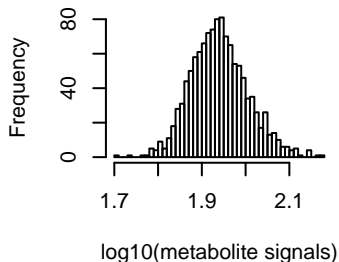**Ile**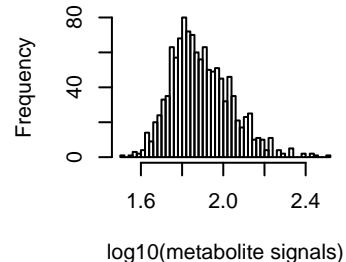

**Leu**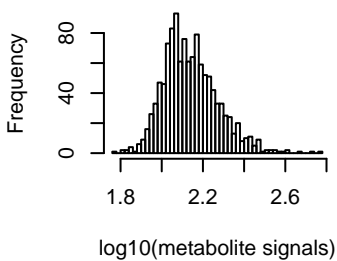**Lys**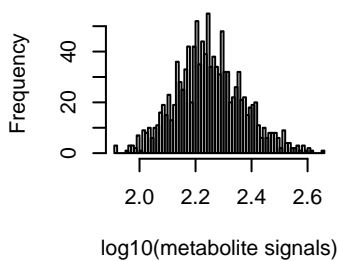**Met**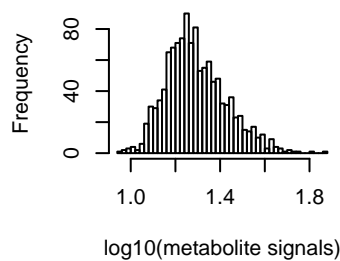**Orn**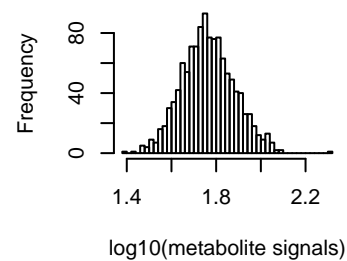**Phe**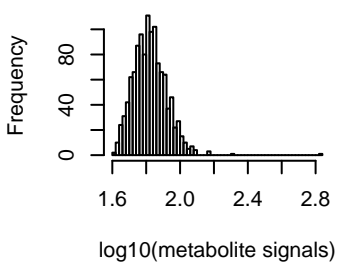**Pro**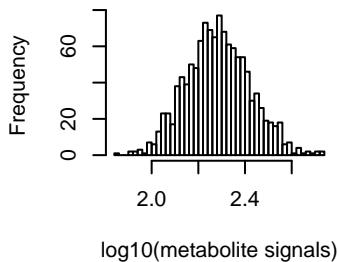**Ser**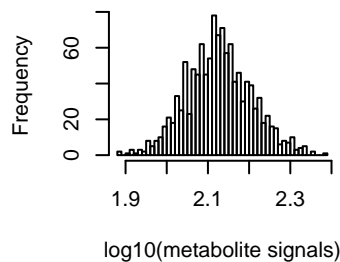**Thr**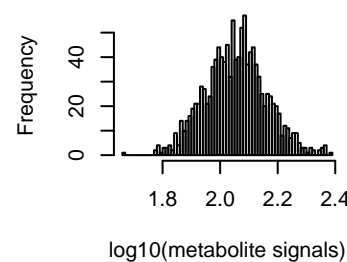**Trp**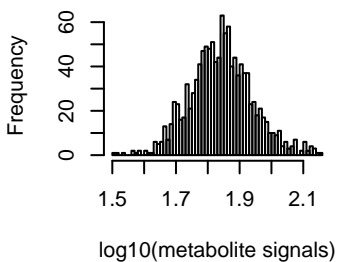**Tyr**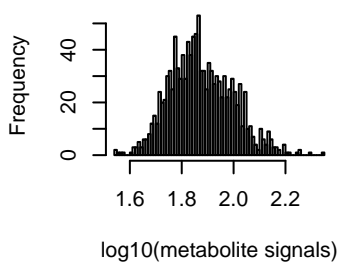**Val**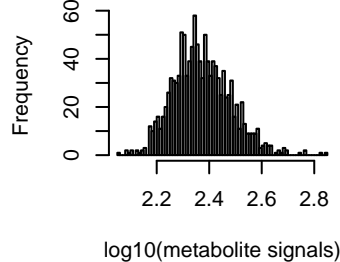**Ac-Orn**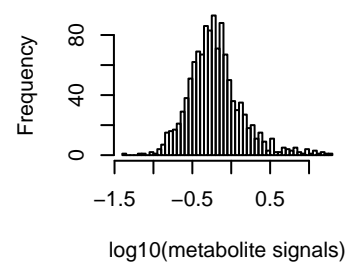**ADMA**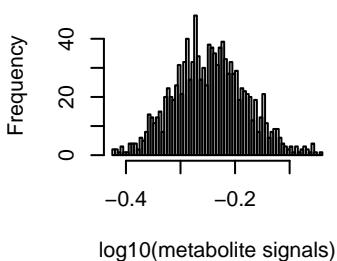**alpha-AAA**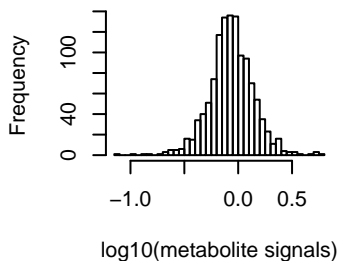**Creatinine**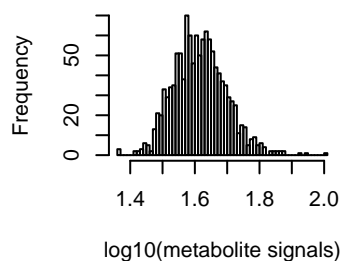**Kynurenine**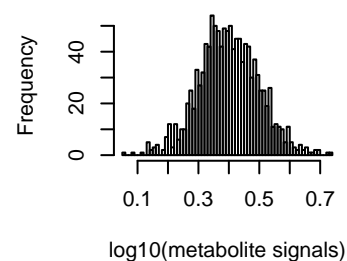**Met-SO**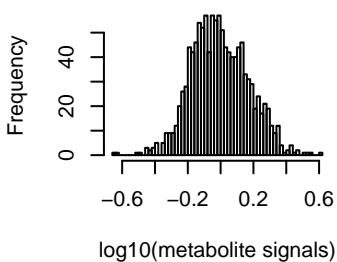**Putrescine**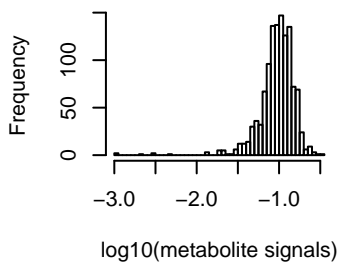**SDMA**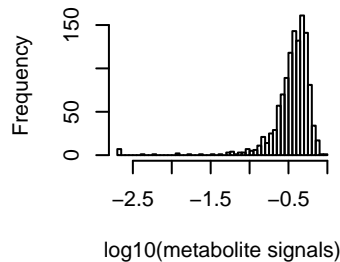**Serotonin**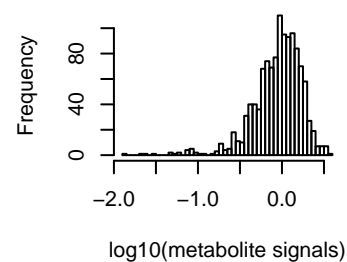**Spermidine**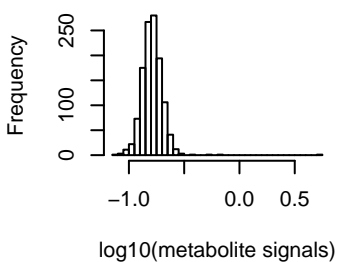**Spermine**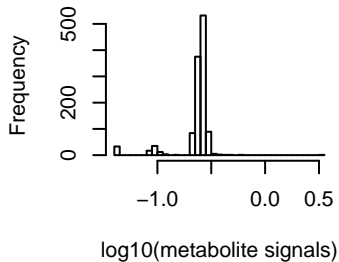**t4-OH-Pro**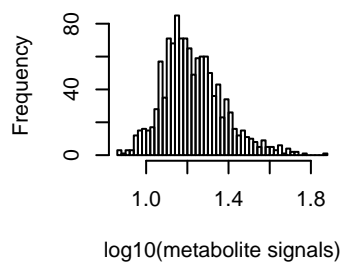**Taurine**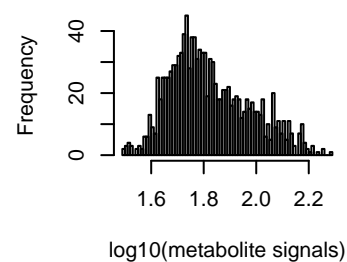

**total DMA**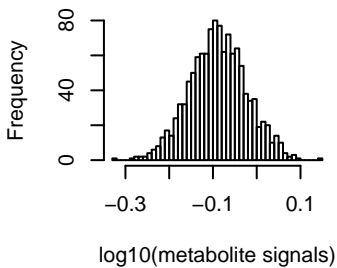**lysoPC a C14:0**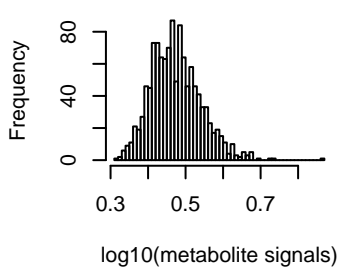**lysoPC a C16:0**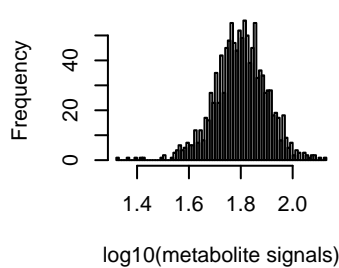**lysoPC a C16:1**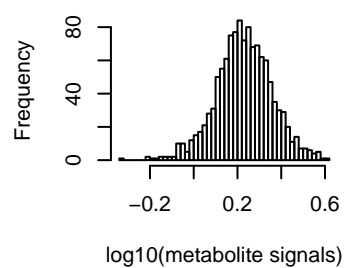**lysoPC a C17:0**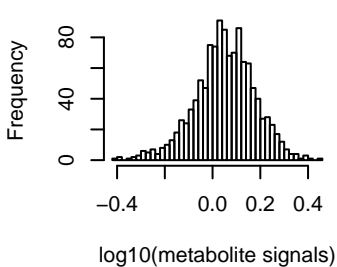**lysoPC a C18:0**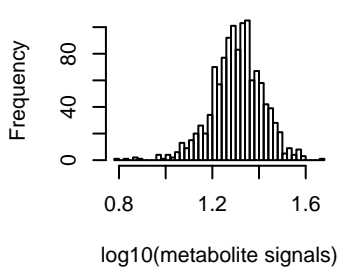**lysoPC a C18:1**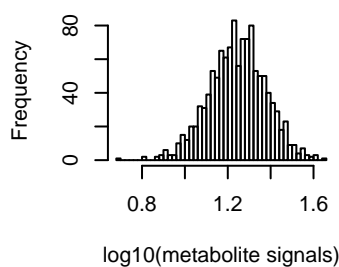**lysoPC a C18:2**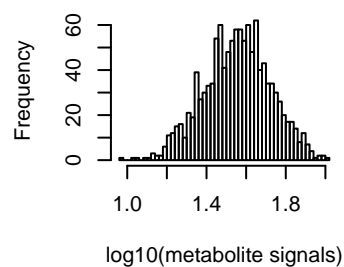**lysoPC a C20:3**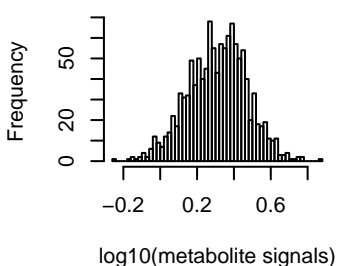**lysoPC a C20:4**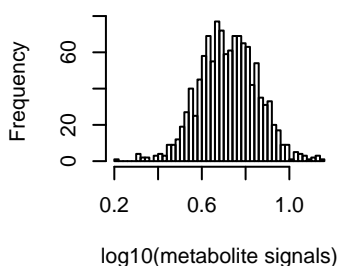**lysoPC a C24:0**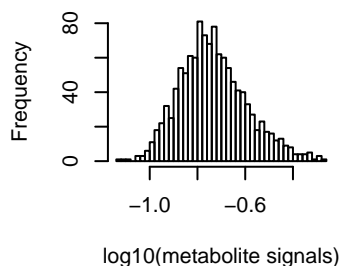**lysoPC a C26:0**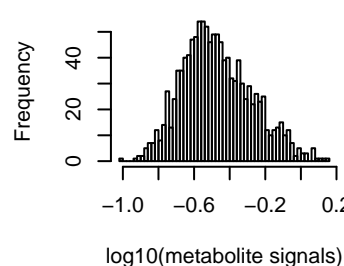**lysoPC a C26:1**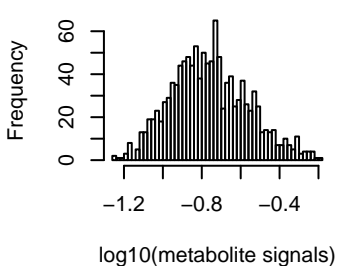**lysoPC a C28:0**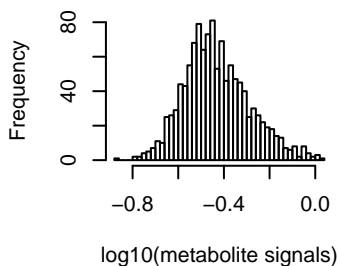**lysoPC a C28:1**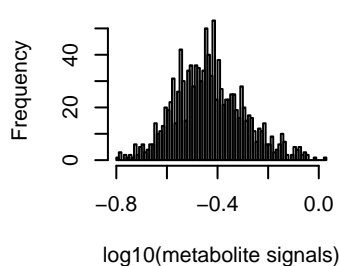**PC aa C24:0**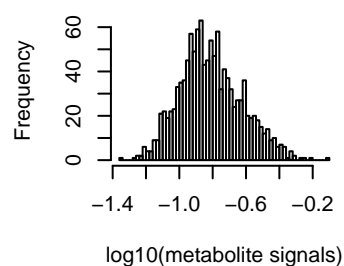**PC aa C28:1**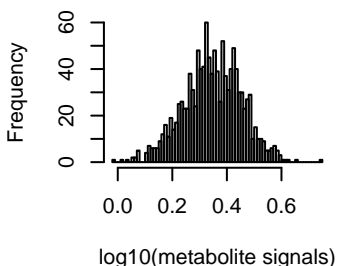**PC aa C30:0**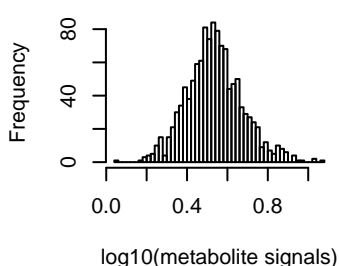**PC aa C30:2**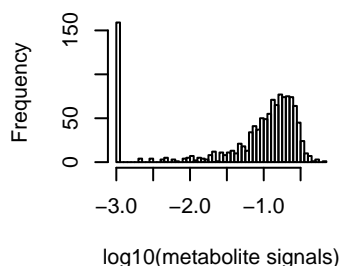**PC aa C32:0**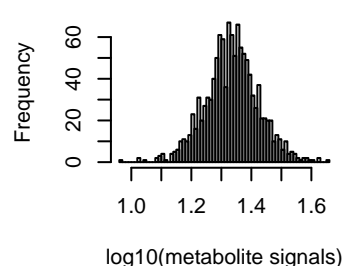**PC aa C32:1**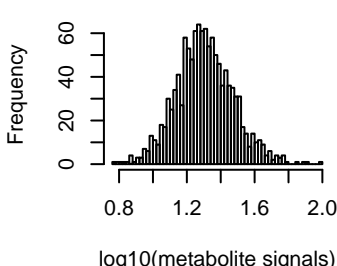**PC aa C32:2**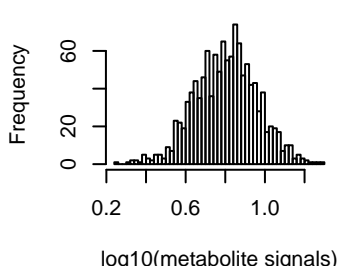**PC aa C32:3**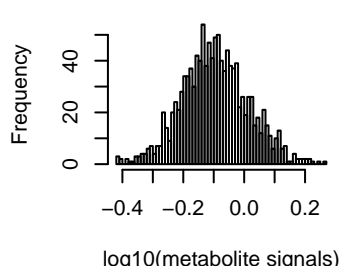**PC aa C34:1**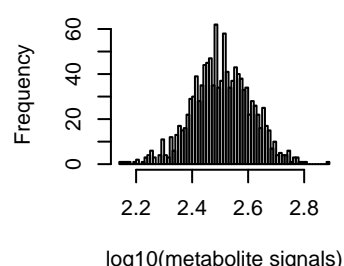

**PC aa C34:2**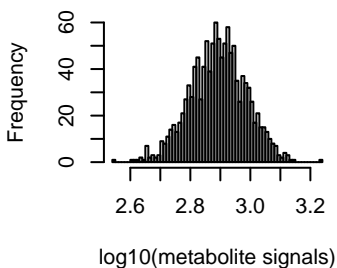**PC aa C34:3**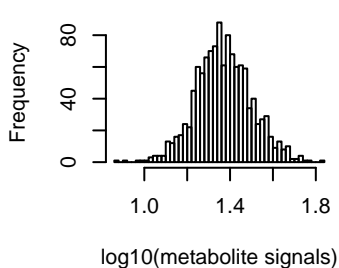**PC aa C34:4**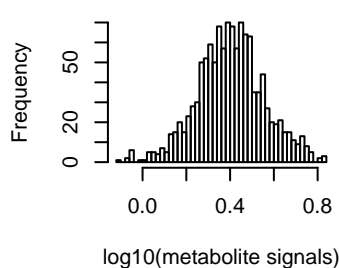**PC aa C36:0**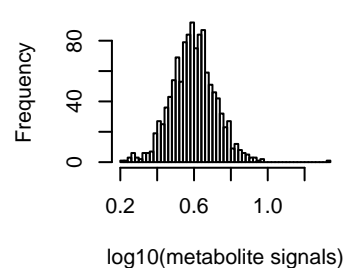**PC aa C36:1**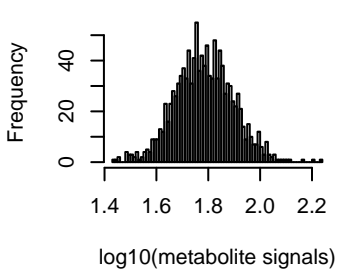**PC aa C36:2**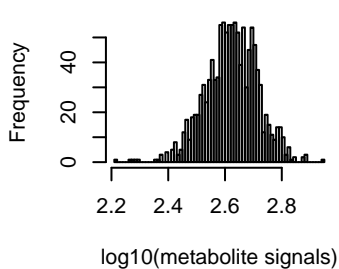**PC aa C36:3**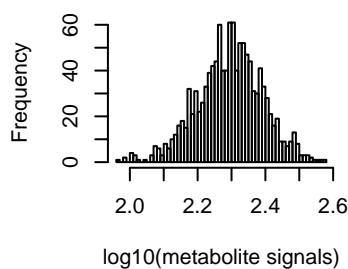**PC aa C36:4**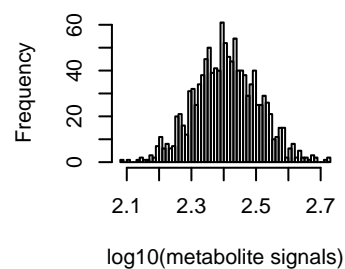**PC aa C36:5**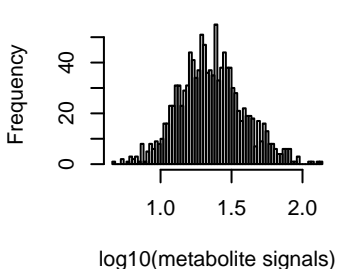**PC aa C36:6**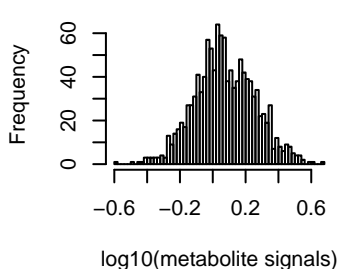**PC aa C38:0**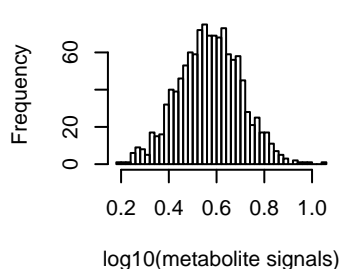**PC aa C38:1**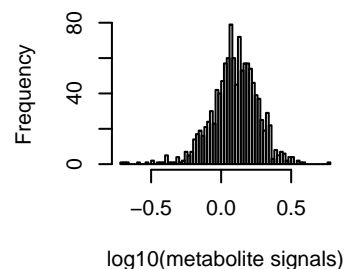**PC aa C38:3**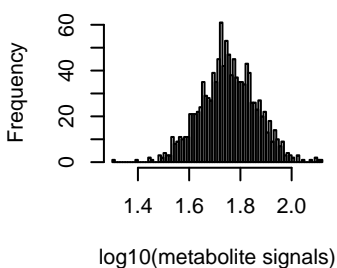**PC aa C38:4**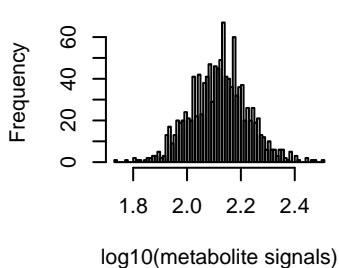**PC aa C38:5**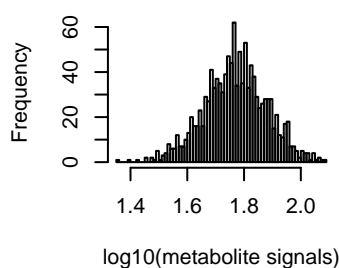**PC aa C38:6**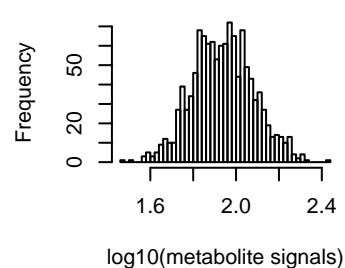**PC aa C40:1**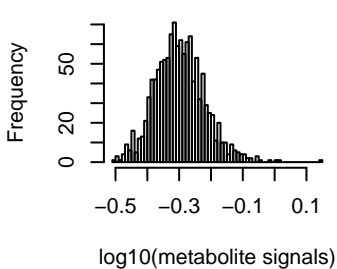**PC aa C40:2**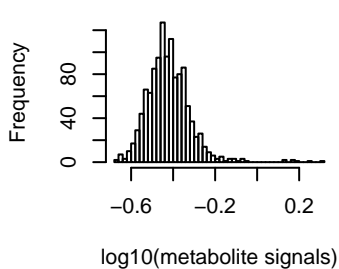**PC aa C40:3**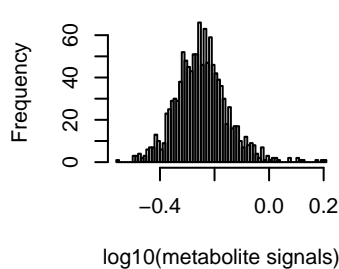**PC aa C40:4**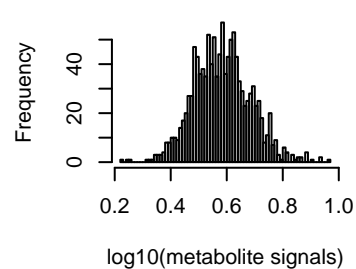**PC aa C40:5**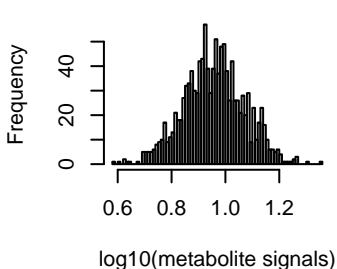**PC aa C40:6**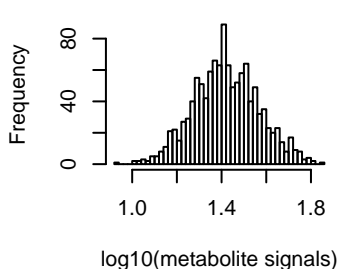**PC aa C42:0**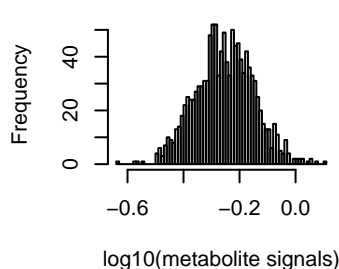**PC aa C42:1**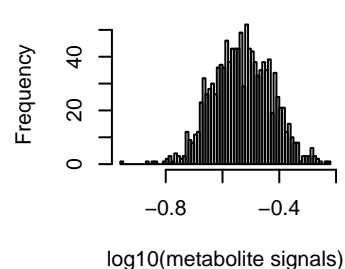

**PC aa C42:2**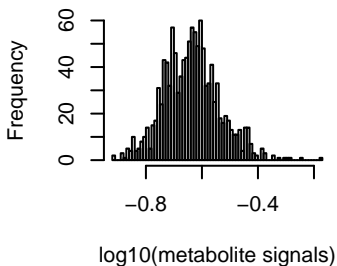**PC aa C42:4**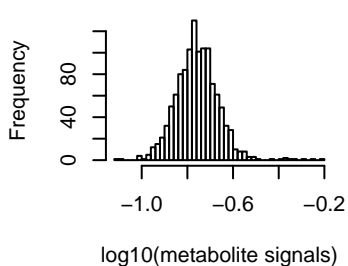**PC aa C42:5**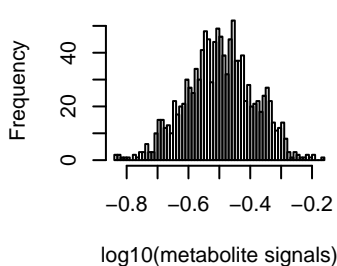**PC aa C42:6**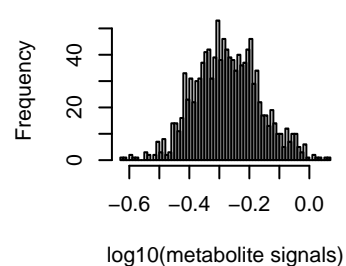**PC ae C30:0**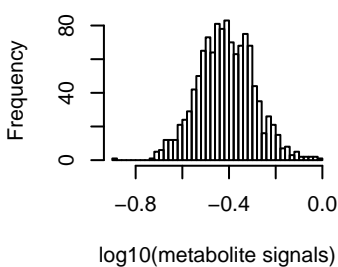**PC ae C30:1**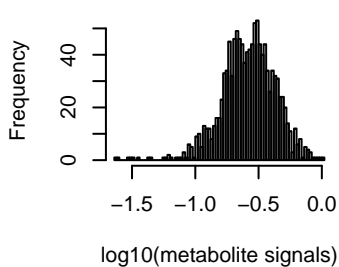**PC ae C30:2**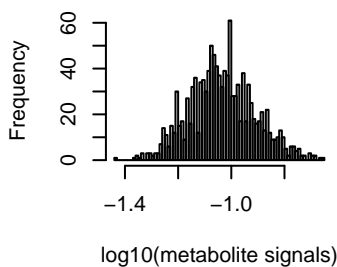**PC ae C32:1**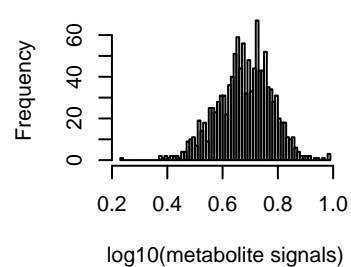**PC ae C32:2**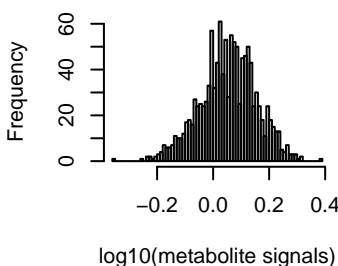**PC ae C34:0**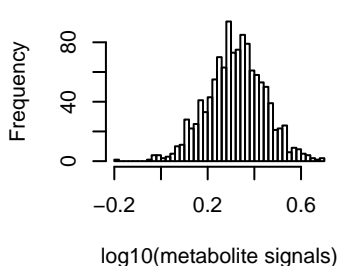**PC ae C34:1**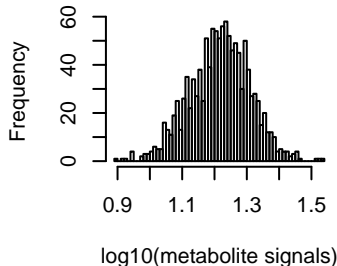**PC ae C34:2**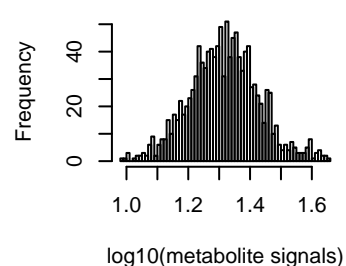**PC ae C34:3**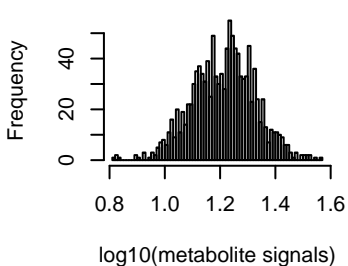**PC ae C36:0**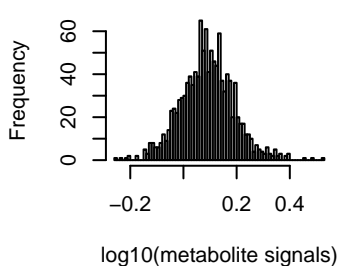**PC ae C36:1**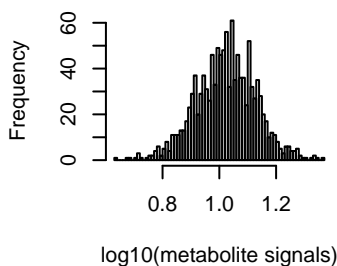**PC ae C36:2**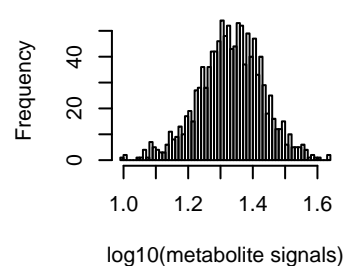**PC ae C36:3**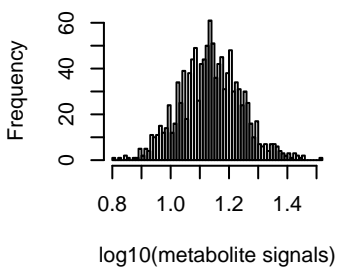**PC ae C36:4**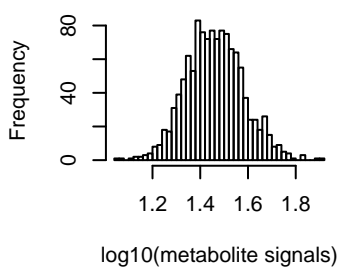**PC ae C36:5**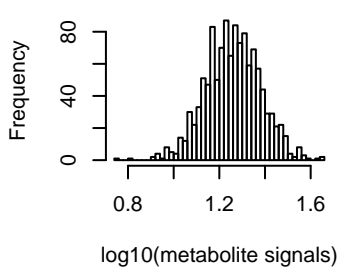**PC ae C38:0**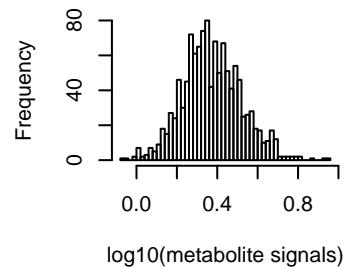**PC ae C38:1**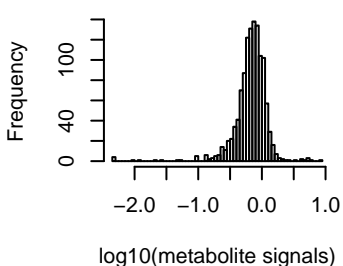**PC ae C38:2**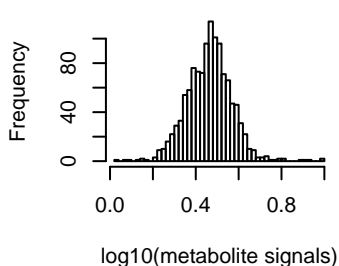**PC ae C38:3**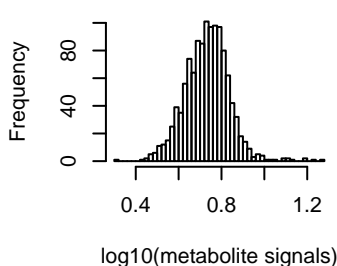**PC ae C38:4**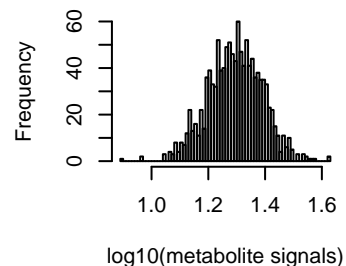

**PC ae C38:5**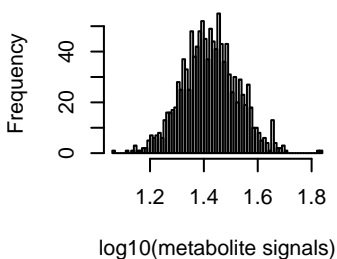**PC ae C38:6**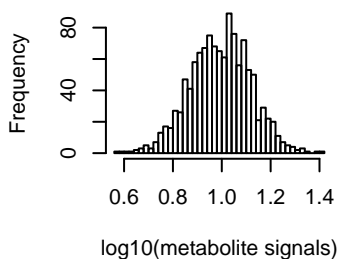**PC ae C40:1**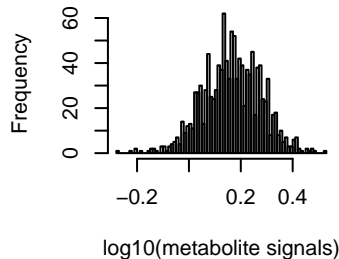**PC ae C40:2**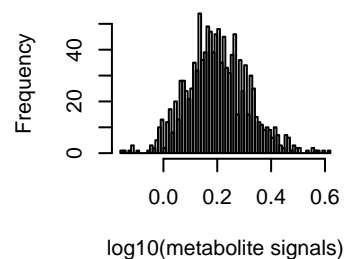**PC ae C40:3**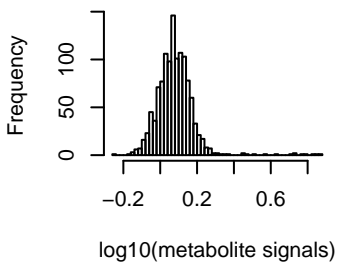**PC ae C40:4**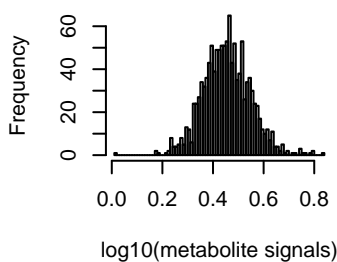**PC ae C40:5**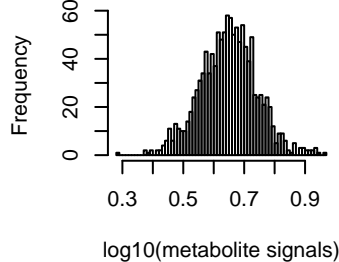**PC ae C40:6**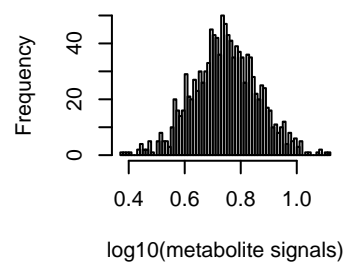**PC ae C42:0**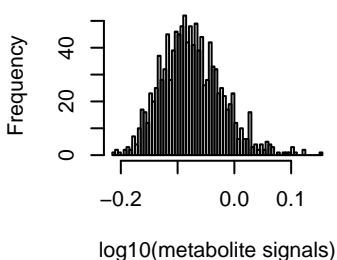**PC ae C42:1**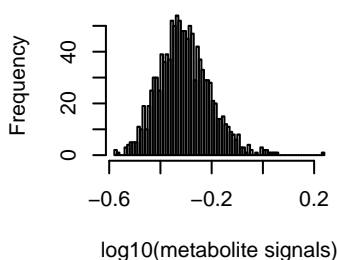**PC ae C42:2**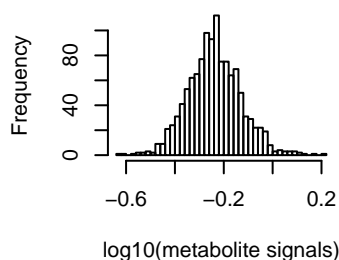**PC ae C42:3**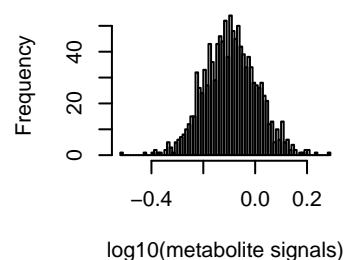**PC ae C42:4**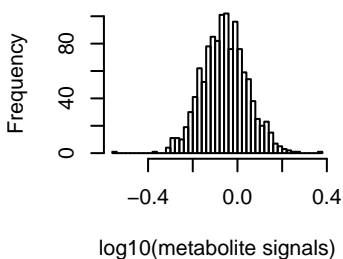**PC ae C42:5**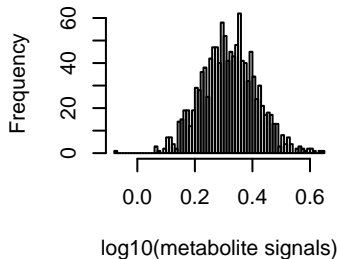**PC ae C44:3**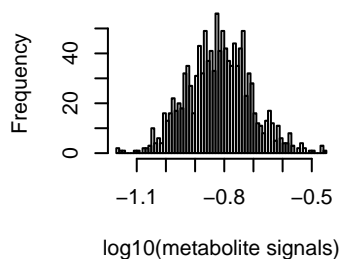**PC ae C44:4**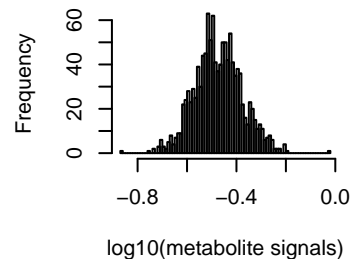**PC ae C44:5**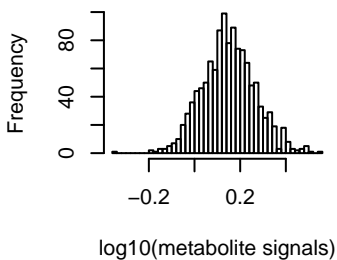**PC ae C44:6**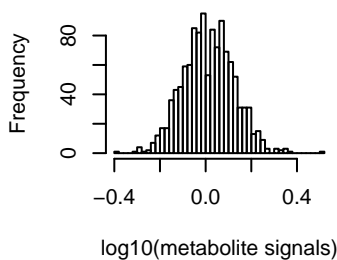**SM (OH) C14:1**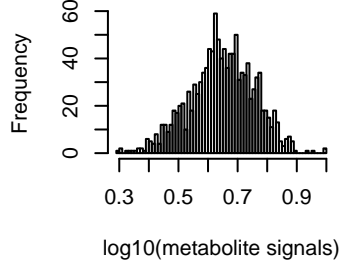**SM (OH) C16:1**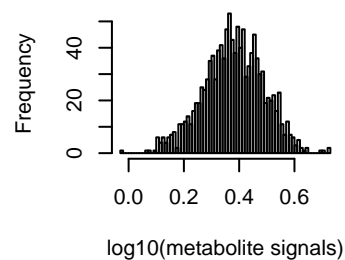**SM (OH) C22:1**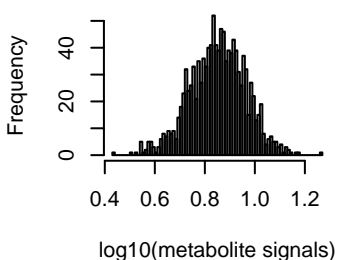**SM (OH) C22:2**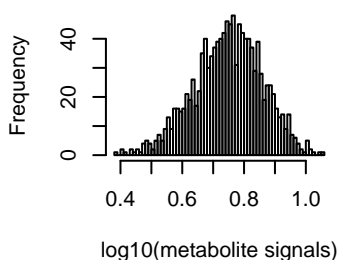**SM (OH) C24:1**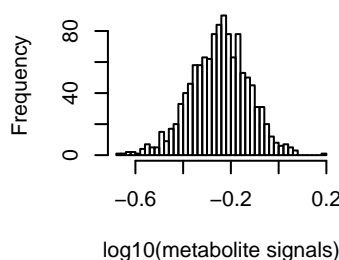**SM C16:0**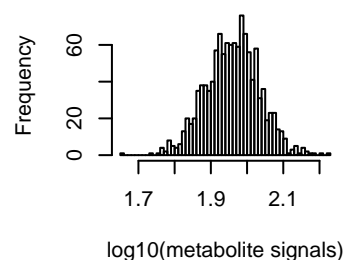

**SM C16:1**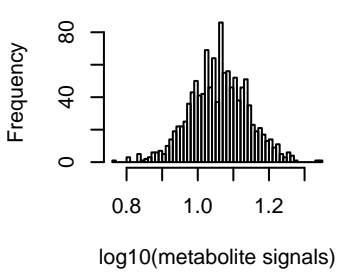**SM C18:0**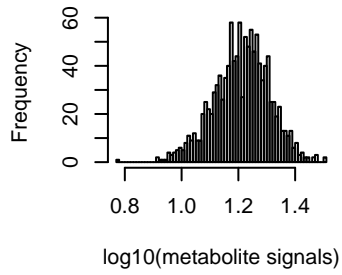**SM C18:1**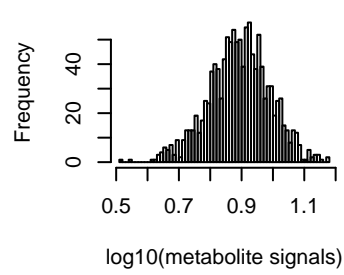**SM C20:2**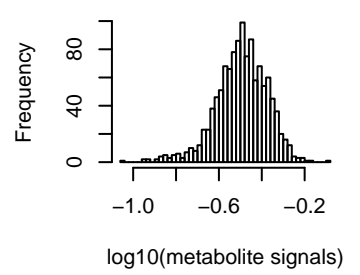**SM C24:0**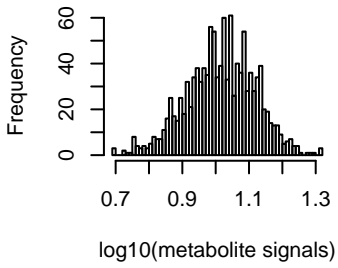**SM C24:1**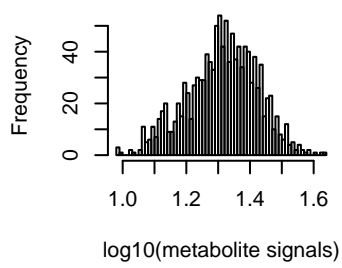**SM C26:0**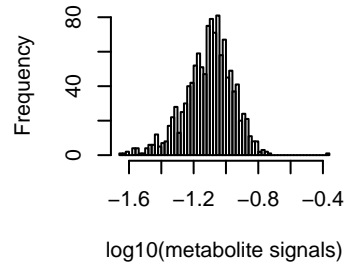**SM C26:1**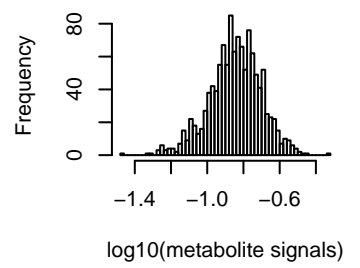**H1**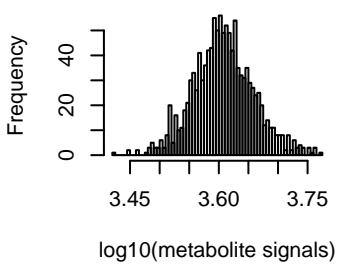

Supplement: MOESM2 [file 12916_2018_1190_MOESM2_ESM.pdf]
