# Supplementary material for: Determinants of the urinary and serum metabolome in children from six European populations
Source: Springer Nature journal article supplement (doi:10.1186/s12916-018-1190-8), 2018-11-05
Supplement: MOESM1 [file 12916_2018_1190_MOESM1_ESM.pdf]

## Supplementary Figures and Tables

### Determinants of the urinary and serum metabolome in children from six European populations

Chung-Ho E. Lau<sup>1 † \*</sup>, Alexandros P. Siskos<sup>1, 2 †</sup>, Léa Maitre<sup>3,4,5</sup>, Oliver Robinson<sup>6</sup>, Toby J. Athersuch<sup>1,6</sup>, Elizabeth J. Want<sup>1</sup>, Jose Urquiza<sup>3,4,5</sup>, Maribel Casas<sup>3,4,5</sup>, Marina Vafeiadi<sup>7</sup>, Theano Roumeliotaki<sup>7</sup>, Rosemary R.C. McEachan<sup>9</sup>, Rafaq Azad<sup>9</sup>, Line S. Haug<sup>10</sup>, Helle M. Meltzer<sup>10</sup>, Sandra Andrusaityte<sup>11</sup>, Inga Petraviciene<sup>11</sup>, Regina Grazuleviciene<sup>11</sup>, Cathrine Thomsen<sup>10</sup>, John Wright<sup>9</sup>, Remy Slama<sup>8</sup>, Leda Chatzi<sup>12</sup>, Martine Vrijheid<sup>3,4,5</sup>, Hector C. Keun<sup>2#</sup>, Muireann Coen<sup>1,13 #\*</sup>

† Authors contributed equally to the work

# Joint senior authors

\*Corresponding authors: Dr. Chung-Ho E. Lau ([esmond.lau06@imperial.ac.uk](mailto:esmond.lau06@imperial.ac.uk)) and Dr. Muireann Coen ([m.coen@imperial.ac.uk](mailto:m.coen@imperial.ac.uk))

#### Supplementary Figure 1 Distribution of postprandial time interval (between last meal and blood sample collection)

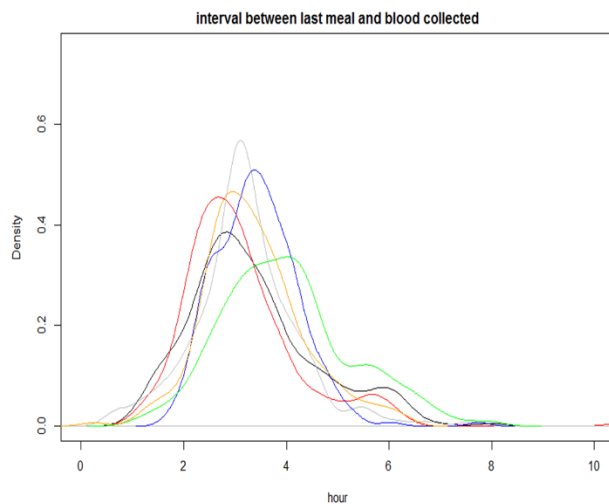

BiB; INMA; EDEN; MoBa; Rhea; KANC

## Supplementary Figure 2 Effect of postprandial period on serum metabolite levels

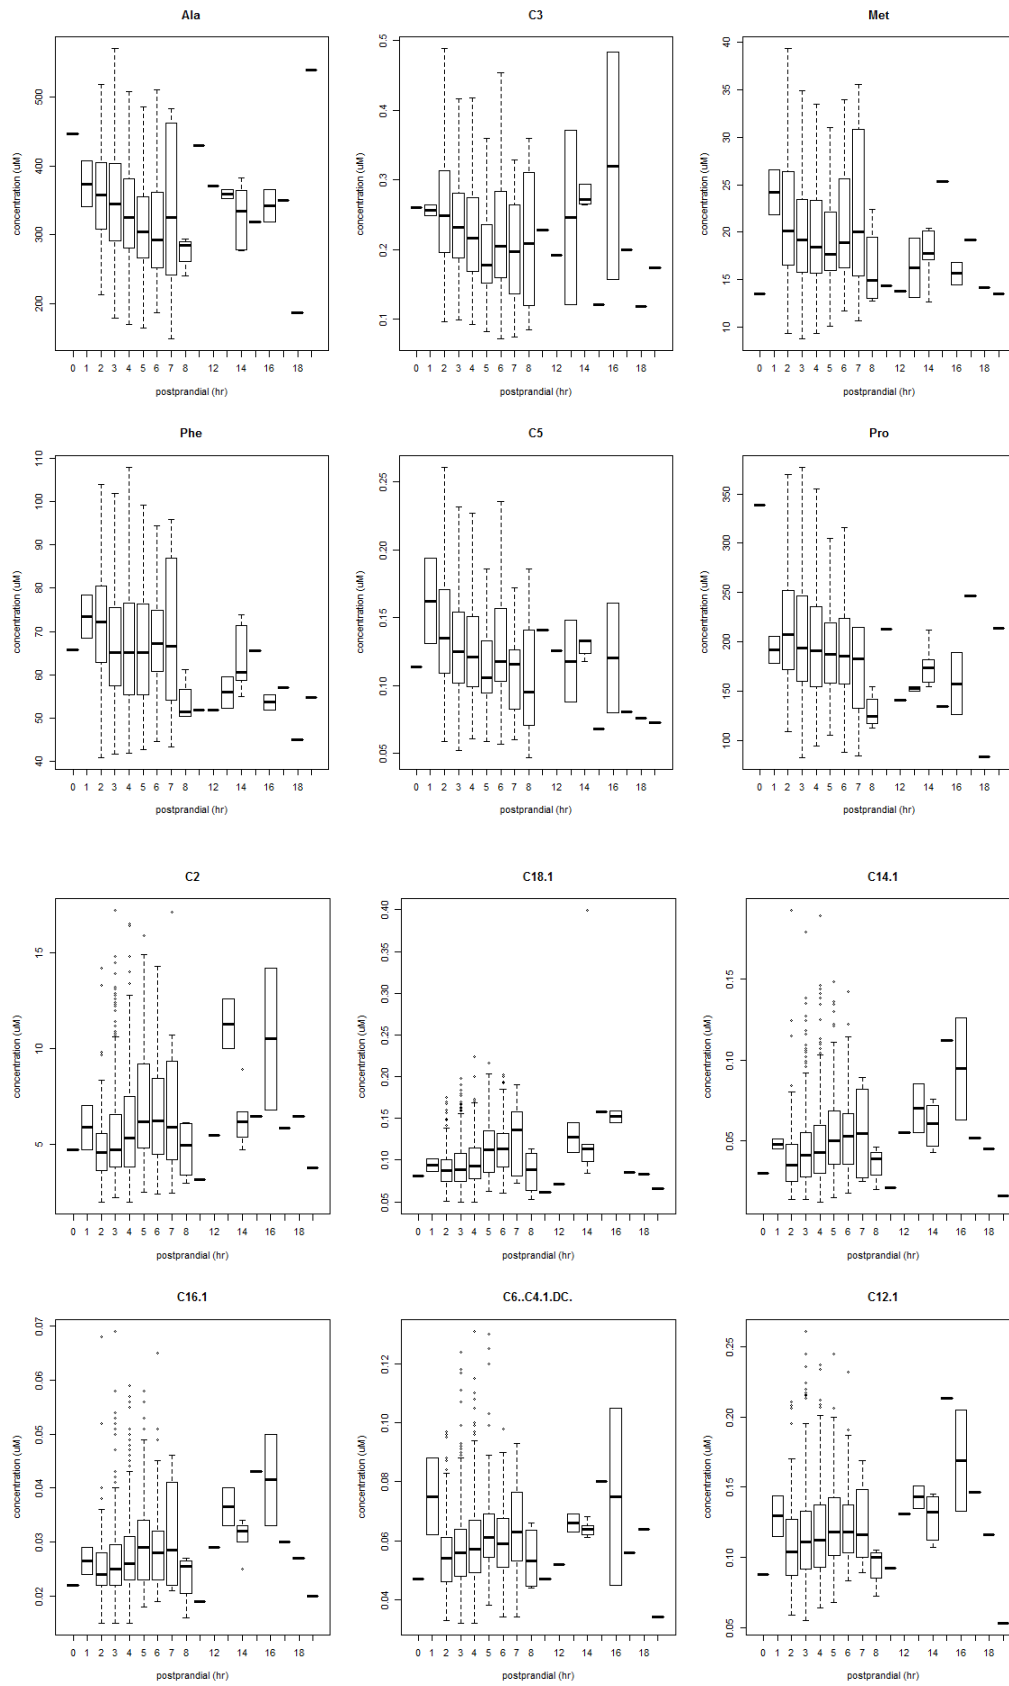

**Supplementary Figure 3 Associations between urine creatinine and age by cohort.** Coefficients represent SD per year

| Cohort  | SD   | [95% CI]      |
|---------|------|---------------|
| BiB     | 0.40 | [-0.22; 1.02] |
| EDEN    | 0.27 | [-0.03; 0.56] |
| KANC    | 0.35 | [0.04; 0.66]  |
| MoBa    | 0.33 | [0.06; 0.60]  |
| Rhea    | 0.84 | [0.34; 1.33]  |
| INMA    | 0.45 | [0.20; 0.71]  |
| Overall | 0.39 | [0.26; 0.53]  |

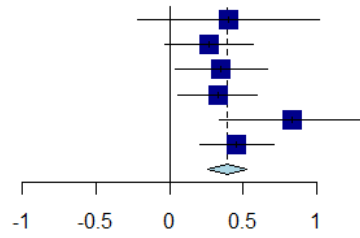

**Supplementary Figure 4 Associations between serum creatinine and age by cohort.** Coefficients represent SD per year

| Cohort  | SD   | [95% CI]      |
|---------|------|---------------|
| BiB     | 0.24 | [-0.39; 0.86] |
| EDEN    | 0.51 | [0.23; 0.80]  |
| KANC    | 0.28 | [-0.02; 0.58] |
| MoBa    | 0.40 | [0.14; 0.66]  |
| Rhea    | 0.30 | [-0.20; 0.81] |
| INMA    | 0.05 | [-0.21; 0.30] |
| Overall | 0.30 | [0.17; 0.43]  |

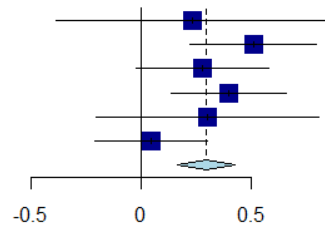

**Supplementary Figure 5 Associations of urine 4-deoxyerythronic acid with zBMI by cohort.** Coefficients represent SD per BMI z-score

| Cohort  | SD    | [95% CI]      |
|---------|-------|---------------|
| BiB     | 0.25  | [0.11; 0.38]  |
| EDEN    | 0.25  | [0.10; 0.40]  |
| KANC    | 0.25  | [0.14; 0.36]  |
| MoBa    | -0.00 | [-0.16; 0.15] |
| Rhea    | 0.22  | [0.12; 0.33]  |
| INMA    | 0.19  | [0.08; 0.30]  |
| Overall | 0.21  | [0.16; 0.26]  |

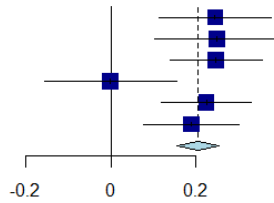

**Supplementary Figure 6 Associations of urine valine with zBMI by cohort.** Coefficients represent SD per BMI z-score

| Cohort  | SD   | [95% CI]      |
|---------|------|---------------|
| BiB     | 0.09 | [-0.04; 0.23] |
| EDEN    | 0.10 | [-0.05; 0.24] |
| KANC    | 0.13 | [0.01; 0.26]  |
| MoBa    | 0.01 | [-0.15; 0.16] |
| Rhea    | 0.07 | [-0.04; 0.18] |
| INMA    | 0.14 | [0.03; 0.26]  |
| Overall | 0.09 | [0.04; 0.15]  |

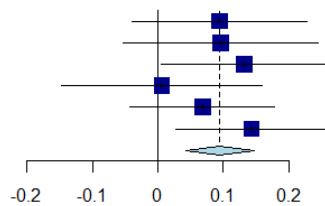

**Supplementary Figure 7 Associations of serum glutamate with zBMI by cohort.** Coefficients represent SD per BMI z-score

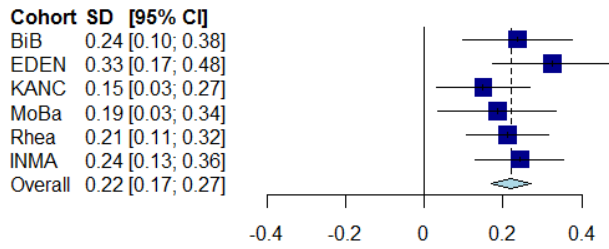

**Supplementary Figure 8 Associations of serum carnitine (C0) with zBMI by cohort**

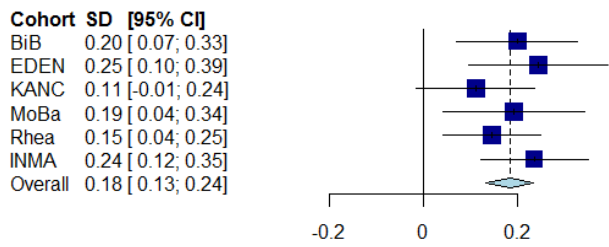

**Supplementary Figure 9 PCA analysis - cumulative R<sup>2</sup> (variance explained) of the urine and serum data model.** Data were log<sub>10</sub> transformed, mean-centred and univariate scaled prior to modelling

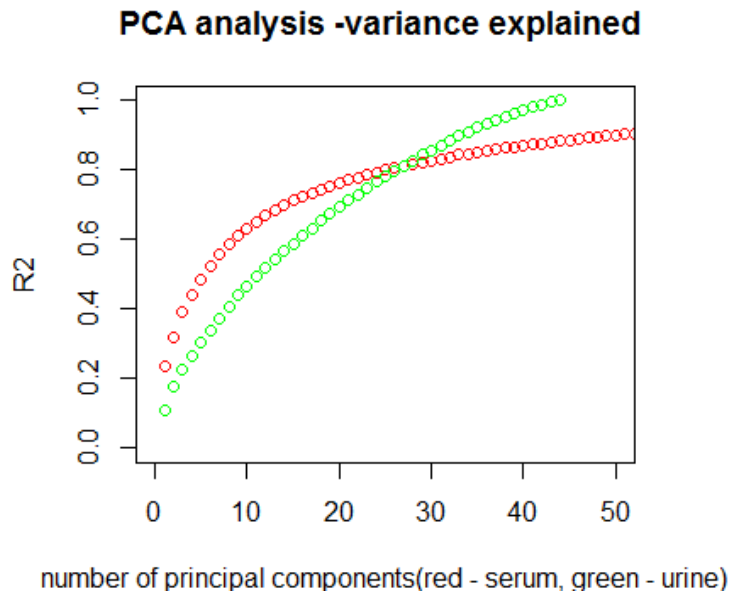



**Supplementary Table 1 <sup>1</sup>H NMR spectroscopy urinary metabolite annotations and assignments**

| Metabolite                             | ChEBI ID    | HMDB ID                  | Compound Class                                                               | Resonance (δ / ppm) | Evidence for assignment |
|----------------------------------------|-------------|--------------------------|------------------------------------------------------------------------------|---------------------|-------------------------|
| leucine                                | 25017       | HMDB0000687              | Amino acids, peptides, and analogues                                         | 0.97                | TOCSY                   |
| isoleucine                             | 24898       | HMDB0000172              | Amino acids, peptides, and analogues                                         | 1.02                | TOCSY                   |
| valine                                 | 27266       | HMDB0000883              | Amino acids, peptides, and analogues                                         | 1.04                | TOCSY                   |
| 3-hydroxyisobutyrate                   | 11805       | HMDB0000023              | Beta hydroxy acids and derivatives                                           | 1.08                | HSQC                    |
| 4-deoxyerythronic acid                 | 86347       | HMDB0000498              | Sugar acids and derivatives                                                  | 1.11                | TOCSY, Spike-in         |
| 4-deoxythreonic acid                   | 86391       | HMDB0002453              | Sugar acids and derivatives                                                  | 1.24                | TOCSY, Spike-in         |
| threonine / lactate                    | 26986/24996 | HMDB0000167/ HMDB0000190 | Amino acids, peptides, and analogues/<br>Alpha hydroxy acids and derivatives | 1.33                | STOCSY, HSQC            |
| 2-hydroxyisobutyrate                   | 19641       | HMDB0000729              | Alpha hydroxy acids and derivatives                                          | 1.36                | HSQC                    |
| alanine                                | 16977       | HMDB0000161              | Amino acids, peptides, and analogues                                         | 1.48                | STOCSY                  |
| lysine                                 | 25094       | HMDB0000182              | Amino acids, peptides, and analogues                                         | 1.74                | STOCSY                  |
| acetate                                | 30089       | HMDB0000042              | Carboxylic acids                                                             | 1.93                | HSQC                    |
| <i>p</i> -cresol sulfate               | 82914       | HMDB0011635              | Arylsulfates                                                                 | 2.35                | HSQC, STOCSY            |
| succinate                              | 26806       | HMDB0000254              | Dicarboxylic acids and derivatives                                           | 2.41                | HSQC                    |
| glutamine                              | 28300       | HMDB0000641              | Amino acids, peptides, and analogues                                         | 2.46                | STOCSY                  |
| citrate                                | 30769       | HMDB0000094              | Tricarboxylic acids and derivatives                                          | 2.54                | STOCSY                  |
| dimethylamine                          | 17170       | HMDB0000087              | amines                                                                       | 2.73                | STOCSY                  |
| trimethylamine                         | 18139       | HMDB0000906              | Amines                                                                       | 2.87                | HSQC                    |
| carnitine / choline                    | 17126/15354 | HMDB0000062/ HMDB0000097 | Carnitines/ Cholines                                                         | 3.23                | HSQC                    |
| trimethylamine <i>N</i> -oxide         | 15724       | HMDB0000925              | Aminoxides                                                                   | 3.28                | HSQC                    |
| <i>scyllo</i> -inositol                | 10642       | HMDB0006088              | Alcohols and polyols                                                         | 3.37                | HSQC                    |
| taurine                                | 15891       | HMDB0000251              | Organosulfonic acids                                                         | 3.43                | STOCSY                  |
| glycine                                | 15428       | HMDB0000123              | Amino acids, peptides, and analogues                                         | 3.58                | HSQC                    |
| creatine                               | 16919       | HMDB0000064              | Amino acids, peptides, and analogues                                         | 3.94                | HSQC                    |
| creatinine                             | 16737       | HMDB0000562              | Amino acids, peptides, and analogues                                         | 4.06                | HSQC                    |
| hippurate                              | 132966      | HMDB0000714              | Benzoic acids and derivatives                                                | 7.56                | STOCSY                  |
| formate                                | 15740       | HMDB0000142              | Carboxylic acids                                                             | 8.47                | HSQC                    |
| pantothenic acid                       | 7916        | HMDB0000210              | Polyols                                                                      | 0.94                | Spike-in                |
| 3-hydroxybutyrate / 3-aminoisobutyrate | 37054/49096 | HMDB0000357/HMDB0003911  | Beta hydroxy acids and derivatives/<br>Amino acids, peptides, and analogues  | 1.19                | TOCSY, Spike-in         |
| 3-hydroxyisovalerate                   | 82957       | HMDB0000754              | Hydroxy fatty acids                                                          | 1.27                | STOCSY                  |
| <i>N</i> -acetyl neuraminic acid       | 45744       | HMDB0000230              | Carbohydrates and carbohydrate conjugates                                    | 2.06                | Spike-in                |
| acetone                                | 15347       | HMDB0001659              | Ketones                                                                      | 2.24                | HSQC                    |
| 5-oxoproline                           | 16010       | HMDB0000267              | Amino acids, peptides, and analogues                                         | 2.39                | TOCSY, HSQC, Spike-in   |
| 3-aminoisobutyrate                     | 49096       | HMDB0003911              | Amino acids, peptides, and analogues                                         | 2.62                | TOCSY                   |
| proline betaine                        | 35280       | HMDB0004827              | Amino acids, peptides, and analogues                                         | 3.30                | HSQC                    |
| glucose                                | 17234       | HMDB0000122              | Carbohydrates and carbohydrate conjugates                                    | 5.25                | TOCSY, HSQC, STOCSY     |

| Metabolite                                 | ChEBI ID | HMDB ID       | Compound Class                            | Resonance ( $\delta$ / ppm) | Evidence for assignment |
|--------------------------------------------|----------|---------------|-------------------------------------------|-----------------------------|-------------------------|
| sucrose                                    | 17992    | HMDB0000258   | Carbohydrates and carbohydrate conjugates | 5.42                        | TOCSY, HSQC, STOCSY     |
| urea                                       | 16199    | HMDB0000294   | Organic carbonic acids and derivatives    | 5.81                        | tentative               |
| <i>N</i> -methyl-2-pyridone-5-carboxamide  | 27410    | HMDB0004193   | Nicotinamides                             | 6.67                        | TOCSY, STOCSY, Spike-in |
| <i>p</i> -hydroxyphenylacetate             | 18101    | HMDB0000020   | Phenols                                   | 6.88                        | STOCSY                  |
| tyrosine                                   | 18186    | HMDB0000158   | Amino acids, peptides, and analogues      | 6.91                        | TOCSY                   |
| 3-Indoxylsulfate                           | 43355    | HMDB0000682   | Arylsulfates                              | 7.52                        | TOCSY, HSQC, STOCSY     |
| <i>N</i> -methylpicolinic acid             | 69061    | Not Available | Alkaloids and derivatives                 | 8.72                        | TOCSY                   |
| <i>N</i> -methylnicotinic acid             | 50521    | HMDB0000875   | Alkaloids and derivatives                 | 9.12                        | STOCSY                  |
| <i>N</i> <sub>1</sub> -methyl-nicotinamide | 16797    | HMDB0000699   | Nicotinamides                             | 9.28                        | STOCSY                  |

NB. Assignments were ambiguous for 3 of the metabolite signals: Threonine / Lactate ( $\delta$  1.33) – resonance peak contain signal contributions from both threonine and lactate. Carnitine / Choline ( $\delta$  3.23) - resonance peak contain signal contributions from both carnitine and choline. 3-hydroxybutyrate / 3-aminoisobutyrate ( $\delta$  1.19) - resonance peak contain signal contributions from both 3-hydroxybutyrate and 3-aminoisobutyrate. HMDB identifier for *N*-methylpicolinic acid cannot be located on the Human Metabolome Database website.

**Supplementary Table 2 Non-detection rates of urinary metabolites and coefficient of variation (CV)**

| <b>Signals</b>                             | <b>Non-detected (%)</b> | <b>Coefficient of variation (%)</b> |
|--------------------------------------------|-------------------------|-------------------------------------|
| creatinine                                 | 0%                      | 7%                                  |
| leucine                                    | 0%                      | 7%                                  |
| isoleucine                                 | 1%                      | 14%                                 |
| valine                                     | 0%                      | 10%                                 |
| 3-hydroxyisobutyrate                       | 0%                      | 7%                                  |
| 4-deoxyerythronic acid                     | 0%                      | 8%                                  |
| 4-deoxythreonic acid                       | 0%                      | 6%                                  |
| threonine/ lactate                         | 0%                      | 4%                                  |
| 2-hydroxyisobutyrate                       | 0%                      | 6%                                  |
| alanine                                    | 0%                      | 6%                                  |
| lysine                                     | 0%                      | 7%                                  |
| acetate                                    | 0%                      | 22%                                 |
| <i>p</i> -cresol sulfate                   | 0%                      | 8%                                  |
| succinate                                  | 7%                      | 12%                                 |
| glutamine                                  | 1%                      | 5%                                  |
| citrate                                    | 0%                      | 7%                                  |
| dimethylamine                              | 1%                      | 14%                                 |
| trimethylamine                             | 0%                      | 7%                                  |
| carnitine / choline                        | 1%                      | 12%                                 |
| trimethylamine <i>N</i> -oxide             | 2%                      | 6%                                  |
| <i>scyllo</i> -inositol                    | 4%                      | 17%                                 |
| taurine                                    | 1%                      | 5%                                  |
| glycine                                    | 0%                      | 9%                                  |
| creatine                                   | 0%                      | 7%                                  |
| hippurate                                  | 0%                      | 6%                                  |
| formate                                    | 0%                      | 9%                                  |
| pantothenic acid                           | 0%                      | 7%                                  |
| 3-hydroxybutyrate / 3-aminoisobutyrate     | 3%                      | 10%                                 |
| 3-hydroxyisovalerate                       | 0%                      | 6%                                  |
| <i>N</i> -acetyl neuraminic acid           | 1%                      | 13%                                 |
| acetone                                    | 1%                      | 28%                                 |
| 5-oxoproline                               | 1%                      | 12%                                 |
| 3-aminoisobutyrate                         | 2%                      | 10%                                 |
| proline betaine                            | 8%                      | 20%                                 |
| glucose                                    | 0%                      | 11%                                 |
| sucrose                                    | 1%                      | 6%                                  |
| urea                                       | 0%                      | 8%                                  |
| <i>N</i> -methyl-2-pyridone-5-carboxamide  | 6%                      | 12%                                 |
| <i>p</i> -hydroxyphenylacetate             | 0%                      | 7%                                  |
| tyrosine                                   | 0%                      | 10%                                 |
| 3-Indoxylsulfate                           | 2%                      | 15%                                 |
| <i>N</i> -methylpicolinic acid             | 46%                     | 27%                                 |
| <i>N</i> -methylnicotinic acid             | 0%                      | 13%                                 |
| <i>N</i> <sub>1</sub> -methyl nicotinamide | 1%                      | 20%                                 |



**Supplementary Table 3 Coefficient of variation (CV) and percentage of measurements below the limit of detection (%BLD) per metabolite**

| Metabolite short name | Common name                 | ChEBI ID                              | Class           | Assay | CV %  | % BLD |
|-----------------------|-----------------------------|---------------------------------------|-----------------|-------|-------|-------|
| Ala                   | L-Alanine                   | 15570 / 16977                         | aminoacids      | LC    | 7.5   | 0     |
| Arg                   | L-Arginine                  | 29016 / 15816 / 16467                 | aminoacids      | LC    | 8.3   | 0     |
| Asn                   | L-Asparagine                | 22653 / 17196 / 28159                 | aminoacids      | LC    | 8.1   | 0     |
| Asp                   | L-Aspartic acid             | 22660 / 17053 / 17364                 | aminoacids      | LC    | 14.9  | 0     |
| Cit                   | L-Citrulline                | 18211 / 16349 / 49007                 | aminoacids      | LC    | 10.2  | 0     |
| Gln                   | L-Glutamine                 | 28300 / 17061 / 18050                 | aminoacids      | LC    | 7.7   | 0     |
| Glu                   | L-Glutamic acid             | 18237 / 15966 / 16015                 | aminoacids      | LC    | 9     | 0     |
| Gly                   | Glycine                     | 15428                                 | aminoacids      | LC    | 7     | 0     |
| His                   | L-Histidine                 | 27570 / 15971 / 27947                 | aminoacids      | LC    | 7.8   | 0     |
| Ile                   | L-Isoleucine                | 38264 / 22359 / 24898 / 17191 / 43433 | aminoacids      | LC    | 7.6   | 0     |
| Leu                   | L-Leucine                   | 25017 / 15603 / 28225                 | aminoacids      | LC    | 7.8   | 0     |
| Lys                   | L-Lysine                    | 25094 / 16855 / 18019                 | aminoacids      | LC    | 9     | 0     |
| Met                   | L-Methionine                | 16811 / 16643 / 16867                 | aminoacids      | LC    | 12.2  | 0     |
| Orn                   | L-Ornithine                 | 18257 / 15729 / 16176                 | aminoacids      | LC    | 8.6   | 0     |
| Phe                   | L-Phenylalanine             | 28044 / 16998 / 17295                 | aminoacids      | LC    | 8.4   | 0     |
| Pro                   | L-Proline                   | 26271 / 16313 / 17203                 | aminoacids      | LC    | 7.9   | 0     |
| Ser                   | L-Serine                    | 17822 / 16523 / 17115                 | aminoacids      | LC    | 8     | 0     |
| Thr                   | L-Threonine                 | 16857 / 38263 / 26986 / 28718 / 38262 | aminoacids      | LC    | 8     | 0     |
| Trp                   | L-Tryptophan                | 27897 / 16296 / 16828                 | aminoacids      | LC    | 8.5   | 0     |
| Tyr                   | L-Tyrosine                  | 18186 / 17895 / 28479                 | aminoacids      | LC    | 8.4   | 0     |
| Val                   | L-Valine                    | 27266 / 16414 / 27477                 | aminoacids      | LC    | 7.3   | 0     |
| Ac-Orn                | N-Acetylmethionine          | 16543 / 44673                         | biogenic amines | LC    | 14.5  | 19.2  |
| ADMA                  | Asymmetric dimethylarginine | 17929                                 | biogenic amines | LC    | 11.8  | 0     |
| alpha-AAA             | alpha-Aminoadipic acid      | 37024 / 37023 / 37025                 | biogenic amines | LC    | 21.8  | 5.6   |
| Creatinine            | Creatinine                  | 16737                                 | biogenic amines | LC    | 7.5   | 0     |
| Histamine (#)         | Histamine                   | 18295                                 | biogenic amines | LC    | 56.5  | 100   |
| Kynurenine            | Kynurenine                  | 28683 / 16946 / 86262                 | biogenic amines | LC    | 9.6   | 0     |
| Met-SO                | Methionine Sulfoxide        | 17016 / 49031 / 49032 / 49033 / 49034 | biogenic amines | LC    | 16.4  | 4.8   |
| Putrescine            | Putrescine                  | 17148                                 | biogenic amines | LC    | 44.8  | 5.1   |
| SDMA                  | Symmetric dimethylarginine  | 25682                                 | biogenic amines | LC    | 35.9  | 5.4   |
| Serotonin             | Serotonin                   | 28790                                 | biogenic amines | LC    | 24    | 0     |
| Spermidine            | Spermidine                  | 16610                                 | biogenic amines | LC    | 17.1  | 66.5  |
| Spermine              | Spermine                    | 15746                                 | biogenic amines | LC    | 36.6  | 3     |
| t4-OH-Pro             | trans-4-Hydroxyproline      | 18095 / 86499 / 20392                 | biogenic amines | LC    | 10    | 0     |
| Taurine               | Taurine                     | 15891                                 | biogenic amines | LC    | 7.6   | 0     |
| total DMA             | Total dimethylarginine      | 86468 / 17929 / 25682                 | biogenic amines | LC    | 14.1  | 0     |
| c4-OH-Pro (#)         | cis-4-Hydroxyproline        | 18095 / 20392                         | biogenic amines | LC    | NA    | 99.9  |
| Carnosine (#)         | Carnosine                   | 15727                                 | biogenic amines | LC    | 274.9 | 97.9  |
| DOPA (#)              | DOPA                        | 49168 / 49169 / 15765                 | biogenic amines | LC    | NA    | 99.9  |
| Dopamine (#)          | Dopamine                    | 18243                                 | biogenic amines | LC    | 306.2 | 99.0  |
| Nitro-Tyr (#)         | Nitrotyrosine               | 86267                                 | biogenic amines | LC    | 617.2 | 100.0 |
| PEA (#)               | Phenylethylamine            | 50048                                 | biogenic amines | LC    | 612.3 | 97.7  |
| C0                    | L-Carnitine                 | 17126 / 11060 / 16347                 | acylcarnitines  | FIA   | 7.6   | 0     |

| Metabolite short name | Common name                                         | ChEBI ID                                      | Class                | Assay | CV % | % BLD |
|-----------------------|-----------------------------------------------------|-----------------------------------------------|----------------------|-------|------|-------|
| C10                   | Decanoylcarnitine                                   | 68830 / 28717                                 | acylcarnitines       | FIA   | 8.6  | 16.9  |
| C10:1                 | Decenoylcarnitine                                   | 86063 / 73048                                 | acylcarnitines       | FIA   | 10.3 | 68.6  |
| C10:2                 | Decadienylcarnitine                                 | Not Available                                 | acylcarnitines       | FIA   | 8.8  | 99.8  |
| C12                   | Dodecanoylcarnitine                                 | 73054 / 77086                                 | acylcarnitines       | FIA   | 8.1  | 82.5  |
| C12-DC                | Dodecanedioylcarnitine                              | 74121                                         | acylcarnitines       | FIA   | 9.4  | 100   |
| C12:1                 | Dodecenoylcarnitine                                 | 89717 / 86065 / 73053                         | acylcarnitines       | FIA   | 10.1 | 71.3  |
| C14                   | Tetradecanoylcarnitine                              | 73061 / 84634                                 | acylcarnitines       | FIA   | 13.8 | 99.5  |
| C14:1                 | Tetradecenoylcarnitine                              | 86066 / 83049 / 85449                         | acylcarnitines       | FIA   | 11.9 | 1.2   |
| C14:1-OH              | Hydroxytetradecenoylcarnitine                       | 86067 / 73062                                 | acylcarnitines       | FIA   | 13.4 | 98.8  |
| C14:2                 | Tetradecadienylcarnitine                            | 86069 / 73059 / 85451                         | acylcarnitines       | FIA   | 12.1 | 30.6  |
| C14:2-OH              | Hydroxytetradecadienylcarnitine                     | 86070 / 73108 / 85453                         | acylcarnitines       | FIA   | 19.2 | 100   |
| C16                   | Hexadecanoylcarnitine                               | 73067 / 17490                                 | acylcarnitines       | FIA   | 10.4 | 0.1   |
| C16-OH                | Hydroxyhexadecanoylcarnitine                        | 73070 / 86030                                 | acylcarnitines       | FIA   | 24   | 100   |
| C16:1                 | Hexadecenoylcarnitine                               | 86032 / 86031                                 | acylcarnitines       | FIA   | 8.9  | 93.3  |
| C16:1-OH              | Hydroxyhexadecenoylcarnitine                        | 86033 / 85456                                 | acylcarnitines       | FIA   | 14.4 | 98.5  |
| C16:2                 | Hexadecadienylcarnitine                             | 86035 / 73065                                 | acylcarnitines       | FIA   | 22.5 | 99.4  |
| C16:2-OH              | Hydroxyhexadecadienylcarnitine                      | 73109 / 86036                                 | acylcarnitines       | FIA   | 11.9 | 100   |
| C18                   | Octadecanoylcarnitine                               | 84644 / 73074                                 | acylcarnitines       | FIA   | 10.1 | 10.3  |
| C18:1                 | Octadecenoylcarnitine                               | 86475 / 72689 / 86038                         | acylcarnitines       | FIA   | 9    | 30.9  |
| C18:1-OH (#)          | Hydroxyoctadecenoylcarnitine                        | 86039 / 73076                                 | acylcarnitines       | FIA   | 56.7 | 100   |
| C18:2                 | Octadecadienylcarnitine                             | 86480 / 72715 / 85463                         | acylcarnitines       | FIA   | 10.6 | 1.5   |
| C2                    | Acetylcarnitine                                     | 73024 / 57589 / 86045                         | acylcarnitines       | FIA   | 7.4  | 0     |
| C3                    | Propionylcarnitine                                  | 28867 / 53210                                 | acylcarnitines       | FIA   | 15.9 | 0     |
| C3-DC (C4-OH)         | Hydroxybutyrylcarnitine                             | 86047 / 73028 / 72995 / 84842                 | acylcarnitines       | FIA   | 17.4 | 67.2  |
| C3-OH                 | Hydroxypropionylcarnitine                           | 86072                                         | acylcarnitines       | FIA   | 29.4 | 99.9  |
| C3:1 (#)              | Propenoylcarnitine                                  | 86073                                         | acylcarnitines       | FIA   | 65.5 | 100   |
| C4                    | Butyrylcarnitine                                    | 7676 / 21949 / 73017 / 84838 / 84838          | acylcarnitines       | FIA   | 16.5 | 0     |
| C4:1                  | Butenylcarnitine                                    | 88785                                         | acylcarnitines       | FIA   | 15.4 | 99.7  |
| C6 (C4:1-DC)          | Fumaryl-L-carnitine / Hexanoyl-L-carnitine          | 70749 / 84834 / 87264                         | acylcarnitines       | FIA   | 10.1 | 79.8  |
| C5                    | Valeryl-L-carnitine                                 | 86492 / 73025 / 70819 / 73026 / 86050 / 86049 | acylcarnitines       | FIA   | 9.4  | 1.4   |
| C5-M-DC               | Methylglutaryl-L-carnitine                          | 86486 / 70857                                 | acylcarnitines       | FIA   | 17.3 | 99.9  |
| C5-OH (C3-DC-M)       | Hydroxyvaleryl-L-carnitine (Methylmalonylcarnitine) | 86467 / 73031                                 | acylcarnitines       | FIA   | 8.7  | 100   |
| C5:1                  | Tiglylcarnitine                                     | 71179 / 85520                                 | acylcarnitines       | FIA   | 17.2 | 100   |
| C5:1-DC               | Glutaconylcarnitine                                 | 86081 / 85518                                 | acylcarnitines       | FIA   | 21.7 | 99.9  |
| C5-DC (C6-OH)         | Glutaryl-L-carnitine / Hydroxyhexanoyl-L-carnitine  | 73040 / 82952 / 88772                         | acylcarnitines       | FIA   | 17.7 | 98.5  |
| C6:1                  | Hexenoylcarnitine                                   | 88762 / 86082                                 | acylcarnitines       | FIA   | 14.1 | 99.9  |
| C7-DC                 | Pimelylcarnitine                                    | 86084 / 85525                                 | acylcarnitines       | FIA   | 13.5 | 99.7  |
| C8                    | Octanoylcarnitine                                   | 73039 / 18102 / 86051                         | acylcarnitines       | FIA   | 10.7 | 82.7  |
| C9                    | Nonaylcarnitine                                     | 86493 / 70997 / 85527 / 86054                 | acylcarnitines       | FIA   | 14.2 | 99.9  |
| lysoPC a C14:0        |                                                     | 64483 / 64489                                 | glycerophospholipids | FIA   | 8.1  | 99.9  |
| lysoPC a C16:0        |                                                     | 64563 / 72998 / 76078                         | glycerophospholipids | FIA   | 11.1 | 0     |
| lysoPC a C16:1        |                                                     | 64560 / 73851 / 84752                         | glycerophospholipids | FIA   | 11.1 | 0     |

| Metabolite short name | Common name | ChEBI ID                                                                              | Class                | Assay | CV % | % BLD |
|-----------------------|-------------|---------------------------------------------------------------------------------------|----------------------|-------|------|-------|
| lysoPC a C17:0        |             | 72737 / 74340                                                                         | glycerophospholipids | FIA   | 10.8 | 0     |
| lysoPC a C18:0        |             | 64561 / 73858 / 76076                                                                 | glycerophospholipids | FIA   | 11.4 | 0     |
| lysoPC a C18:1        |             | 64566 / 72589 / 76083 / 86255                                                         | glycerophospholipids | FIA   | 11   | 0     |
| lysoPC a C18:2        |             | 64549 / 28733 / 76084                                                                 | glycerophospholipids | FIA   | 11   | 0     |
| lysoPC a C20:3        |             | 64481 / 64488 / 74343 / 86256                                                         | glycerophospholipids | FIA   | 10.8 | 0     |
| lysoPC a C20:4        |             | 64568 / 74344 / 76079 / 86259                                                         | glycerophospholipids | FIA   | 10.7 | 0     |
| lysoPC a C24:0        |             | 74470 / 86260                                                                         | glycerophospholipids | FIA   | 35.8 | 0     |
| lysoPC a C26:0        |             | 74472                                                                                 | glycerophospholipids | FIA   | 56   | 0     |
| lysoPC a C26:1        |             | 74473                                                                                 | glycerophospholipids | FIA   | 58   | 0.6   |
| lysoPC a C28:0        |             | 85561                                                                                 | glycerophospholipids | FIA   | 37.5 | 0.3   |
| lysoPC a C28:1        |             | 85562                                                                                 | glycerophospholipids | FIA   | 43   | 0     |
| PC aa C24:0           |             | 85564 / 65211 / 75302 / 86276 / 86278 / 86280 / 86281 / 86282                         | glycerophospholipids | FIA   | 51   | 1     |
| PC aa C26:0 (#)       |             | Not Available                                                                         | glycerophospholipids | FIA   | 42.5 | 60.1  |
| PC aa C28:1           |             | 65293 / 86410                                                                         | glycerophospholipids | FIA   | 10.9 | 0     |
| PC aa C30:0           |             | 65303 / 75062 / 75304 / 86088                                                         | glycerophospholipids | FIA   | 8.2  | 0     |
| PC aa C30:2           |             | 65301 / 86415                                                                         | glycerophospholipids | FIA   | 56.4 | 14.6  |
| PC aa C32:0           |             | 66850 / 72999 / 86089 / 86090                                                         | glycerophospholipids | FIA   | 12.7 | 0     |
| PC aa C32:1           |             | 66849 / 73793 / 74000 / 84808 / 86092                                                 | glycerophospholipids | FIA   | 13.3 | 0     |
| PC aa C32:2           |             | 66848 / 83717                                                                         | glycerophospholipids | FIA   | 14.9 | 0     |
| PC aa C32:3           |             | 66847 / 86095                                                                         | glycerophospholipids | FIA   | 14.7 | 0     |
| PC aa C34:1           |             | 64517 / 73001 / 74667 / 84570 / 85037 / 86097                                         | glycerophospholipids | FIA   | 12.2 | 0     |
| PC aa C34:2           |             | 64516 / 73002 / 84785 / 84809 / 84810 / 84811 / 86099 / 86100                         | glycerophospholipids | FIA   | 12.7 | 0     |
| PC aa C34:3           |             | 64424 / 84567 / 84786 / 84789                                                         | glycerophospholipids | FIA   | 13.1 | 0     |
| PC aa C34:4           |             | 64423 / 86101 / 86102                                                                 | glycerophospholipids | FIA   | 13.7 | 0     |
| PC aa C36:0           |             | 66858 / 75294 / 83718 / 86103 / 86106 / 86107                                         | glycerophospholipids | FIA   | 13.4 | 0     |
| PC aa C36:1           |             | 66857 / 76073 / 84575 / 84818                                                         | glycerophospholipids | FIA   | 11.1 | 0     |
| PC aa C36:2           |             | 64433 / 74669 / 84574 / 84819 / 84820 / 84821 / 84822 / 84836 / 86112                 | glycerophospholipids | FIA   | 11.6 | 0     |
| PC aa C36:3           |             | 64523 / 74670 / 84831 / 86117 / 86119 / 86121                                         | glycerophospholipids | FIA   | 11.9 | 0     |
| PC aa C36:4           |             | 64520 / 73003 / 77694 / 84794 / 84815 / 86123 / 86127 / 86129 / 86130 / 86133 / 86134 | glycerophospholipids | FIA   | 11.8 | 0     |
| PC aa C36:5           |             | 64504 / 64505 / 84816 / 86137                                                         | glycerophospholipids | FIA   | 12.2 | 0     |
| PC aa C36:6           |             | 66856 / 86161 / 86162                                                                 | glycerophospholipids | FIA   | 14.6 | 0     |
| PC aa C38:0           |             | 66861 / 86163 / 86164 / 86166 / 86167 / 86168 / 86169                                 | glycerophospholipids | FIA   | 10.7 | 0     |
| PC aa C38:1           |             | 66860 / 86170 / 86171 / 86173 / 86174 / 86175                                         | glycerophospholipids | FIA   | 32.2 | 0     |
| PC aa C38:3           |             | 64446 / 74479 / 86176 / 86177                                                         | glycerophospholipids | FIA   | 11.1 | 0     |
| PC aa C38:4           |             | 64526 / 74965 / 84573 / 84823 / 86178                                                 | glycerophospholipids | FIA   | 11.2 | 0     |
| PC aa C38:5           |             | 64525 / 74671 / 84795 / 84796 / 86181                                                 | glycerophospholipids | FIA   | 11   | 0     |
| PC aa C38:6           |             | 64519 / 74963 / 84563 / 84797 / 86182 / 86183 / 86184 / 86186 / 86187                 | glycerophospholipids | FIA   | 11.3 | 0     |
| PC aa C40:1           |             | 66865 / 86188 / 86189 / 86190 / 86196 / 86197                                         | glycerophospholipids | FIA   | 12   | 64.9  |
| PC aa C40:2           |             | 66864 / 86198 / 86199                                                                 | glycerophospholipids | FIA   | 13.9 | 0     |
| PC aa C40:3           |             | 66863 / 86416                                                                         | glycerophospholipids | FIA   | 13.8 | 0     |
| PC aa C40:4           |             | 66862 / 74970 / 84565 / 86200                                                         | glycerophospholipids | FIA   | 10.2 | 0     |
| PC aa C40:5           |             | 64524 / 73865 / 84151 / 86201 / 86203                                                 | glycerophospholipids | FIA   | 11   | 0     |
| PC aa C40:6           |             | 64431 / 73868 / 84829 / 84830 / 86205                                                 | glycerophospholipids | FIA   | 10.4 | 0     |
| PC aa C42:0           |             | 66971 / 86208 / 86210 / 86211 / 86212                                                 | glycerophospholipids | FIA   | 10.7 | 0     |

| Metabolite short name | Common name | ChEBI ID                                      | Class                | Assay | CV % | % BLD |
|-----------------------|-------------|-----------------------------------------------|----------------------|-------|------|-------|
| PC aa C42:1           |             | 66970 / 86213 / 86215 / 86216 / 86217 / 86219 | glycerophospholipids | FIA   | 13.9 | 0     |
| PC aa C42:2           |             | 66969 / 86418                                 | glycerophospholipids | FIA   | 14.7 | 0     |
| PC aa C42:4           |             | 66967 / 86422                                 | glycerophospholipids | FIA   | 13.7 | 0     |
| PC aa C42:5           |             | 66966 / 86220                                 | glycerophospholipids | FIA   | 10.7 | 0     |
| PC aa C42:6           |             | 66965 / 86221                                 | glycerophospholipids | FIA   | 11   | 2.4   |
| PC ae C30:0           |             | 85565                                         | glycerophospholipids | FIA   | 15.9 | 0.1   |
| PC ae C30:1           |             | 85566 / 86225                                 | glycerophospholipids | FIA   | 53.5 | 0     |
| PC ae C30:2           |             | 85567 / 86423                                 | glycerophospholipids | FIA   | 32.9 | 0     |
| PC ae C32:1           |             | 72347 / 86424                                 | glycerophospholipids | FIA   | 14.2 | 0     |
| PC ae C32:2           |             | 85568 / 86425                                 | glycerophospholipids | FIA   | 16.3 | 0     |
| PC ae C34:0           |             | 67077 / 86229                                 | glycerophospholipids | FIA   | 12.8 | 0     |
| PC ae C34:1           |             | 67076 / 84825                                 | glycerophospholipids | FIA   | 12.9 | 0     |
| PC ae C34:2           |             | 64544 / 86231                                 | glycerophospholipids | FIA   | 13.3 | 0     |
| PC ae C34:3           |             | 64541 / 86427                                 | glycerophospholipids | FIA   | 13.2 | 0     |
| PC ae C36:0           |             | 67067 / 86239 / 86240                         | glycerophospholipids | FIA   | 12.7 | 0     |
| PC ae C36:1           |             | 67066 / 86432                                 | glycerophospholipids | FIA   | 11.1 | 0     |
| PC ae C36:2           |             | 67065 / 86504                                 | glycerophospholipids | FIA   | 11.7 | 0     |
| PC ae C36:3           |             | 64537 / 86436                                 | glycerophospholipids | FIA   | 12.4 | 0     |
| PC ae C36:4           |             | 67064 / 55430                                 | glycerophospholipids | FIA   | 12.2 | 0     |
| PC ae C36:5           |             | 64540 / 86437                                 | glycerophospholipids | FIA   | 12.6 | 0     |
| PC ae C38:0           |             | 67071 / 74482 / 86243                         | glycerophospholipids | FIA   | 11.5 | 0     |
| PC ae C38:1           |             | 67070 / 86438                                 | glycerophospholipids | FIA   | 29.3 | 0.5   |
| PC ae C38:2           |             | 67069 / 86439                                 | glycerophospholipids | FIA   | 11.9 | 0     |
| PC ae C38:3           |             | 67068 / 86442                                 | glycerophospholipids | FIA   | 10.7 | 0     |
| PC ae C38:4           |             | 64480 / 86245                                 | glycerophospholipids | FIA   | 12.1 | 0     |
| PC ae C38:5           |             | 64445                                         | glycerophospholipids | FIA   | 11.8 | 0     |
| PC ae C38:6           |             | 64536 / 86248                                 | glycerophospholipids | FIA   | 11.6 | 0     |
| PC ae C40:1           |             | 85574 / 86443                                 | glycerophospholipids | FIA   | 16.9 | 0     |
| PC ae C40:2           |             | 72348 / 86444                                 | glycerophospholipids | FIA   | 10.5 | 0     |
| PC ae C40:3           |             | 85570 / 86445                                 | glycerophospholipids | FIA   | 11.2 | 0     |
| PC ae C40:4           |             | 85571 / 86447                                 | glycerophospholipids | FIA   | 9.9  | 0     |
| PC ae C40:5           |             | 85573 / 86448                                 | glycerophospholipids | FIA   | 11.7 | 0     |
| PC ae C40:6           |             | 64533 / 86252                                 | glycerophospholipids | FIA   | 11.6 | 0     |
| PC ae C42:0           |             | 86253 / 85582                                 | glycerophospholipids | FIA   | 10.6 | 99.9  |
| PC ae C42:1           |             | 85583 / 86449                                 | glycerophospholipids | FIA   | 25   | 10.3  |
| PC ae C42:2           |             | 85584 / 86450                                 | glycerophospholipids | FIA   | 16   | 0     |
| PC ae C42:3           |             | 85585 / 86451                                 | glycerophospholipids | FIA   | 15   | 0     |
| PC ae C42:4           |             | 85588 / 86452                                 | glycerophospholipids | FIA   | 10.3 | 0     |
| PC ae C42:5           |             | 85590                                         | glycerophospholipids | FIA   | 9    | 0     |
| PC ae C44:3           |             | 67085 / 86454                                 | glycerophospholipids | FIA   | 28.3 | 0     |
| PC ae C44:4           |             | 67084 / 86456                                 | glycerophospholipids | FIA   | 13.7 | 0     |
| PC ae C44:5           |             | 67083                                         | glycerophospholipids | FIA   | 11.1 | 0     |
| PC ae C44:6           |             | 67082                                         | glycerophospholipids | FIA   | 10.2 | 0     |
| SM (OH) C14:1         |             | 85597 / 90011                                 | sphingolipids        | FIA   | 9.1  | 0     |
| SM (OH) C16:1         |             | 85626 / 90007                                 | sphingolipids        | FIA   | 10   | 0     |

| Metabolite short name | Common name    | ChEBI ID                                                                                                                                                                                 | Class         | Assay | CV % | % BLD |
|-----------------------|----------------|------------------------------------------------------------------------------------------------------------------------------------------------------------------------------------------|---------------|-------|------|-------|
| SM (OH) C22:1         |                | 85599 / 90010                                                                                                                                                                            | sphingolipids | FIA   | 15.4 | 0     |
| SM (OH) C22:2         |                | 85600 / 90003                                                                                                                                                                            | sphingolipids | FIA   | 15.6 | 0     |
| SM (OH) C24:1         |                | 85601 / 90006                                                                                                                                                                            | sphingolipids | FIA   | 16.2 | 0     |
| SM C16:0              |                | 78646                                                                                                                                                                                    | sphingolipids | FIA   | 9.1  | 0     |
| SM C16:1              |                | 85592 / 64487                                                                                                                                                                            | sphingolipids | FIA   | 9.3  | 0     |
| SM C18:0              |                | 83358                                                                                                                                                                                    | sphingolipids | FIA   | 10.9 | 0     |
| SM C18:1              |                | 85593 / 84487 / 86086                                                                                                                                                                    | sphingolipids | FIA   | 10.3 | 0     |
| SM C20:2              |                | 85595                                                                                                                                                                                    | sphingolipids | FIA   | 13.9 | 0     |
| SM C22:3 (#)          |                | Not available                                                                                                                                                                            | sphingolipids | FIA   | 62.9 | 35    |
| SM C24:0              |                | 83360                                                                                                                                                                                    | sphingolipids | FIA   | 15.3 | 0     |
| SM C24:1              |                | 83172 / 74535                                                                                                                                                                            | sphingolipids | FIA   | 16.4 | 0     |
| SM C26:0              |                | 83361                                                                                                                                                                                    | sphingolipids | FIA   | 27.4 | 0     |
| SM C26:1              |                | 83362 / 84476                                                                                                                                                                            | sphingolipids | FIA   | 27.1 | 0     |
| H1                    | Hexose (Sugar) | 4167 / 17234 / 17925 / 28061 / 4208 / 15903 / 28645 / 10295 / 47693 / 27667 / 37704 / 4139 / 18133 / 1416 / 17011 / 24973 / 33917 / 33921 / 33984 / 4194 / 80423 / 88378 / 88746 / 88747 | sugars        | FIA   | 7.2  | 0     |

NB. LC-MS/MS metabolite exclusion was based on a variable meeting two conditions 1) CV of over 30%; and 2) over 30% of the data are below LOD. 11 out of the 188 serum metabolites detected were excluded as a result. # represents metabolites which were excluded from subsequent data analyses. CV for c4-OH-Pro and DOPA are not available as peaks cannot be detected and/ or integrated reproducibly with the quality control samples. DOPA and c4-OH-Pro are counted as part of the 11 excluded metabolites.

**Supplementary Table 4 Summary of urinary metabolite concentrations across the 6 cohorts**

| <b>μmol/mmol of creatinine (median with IQR)</b> | <b>BiB (n = 199)</b> | <b>EDEN (n = 157)</b> | <b>INMA (n = 207)</b> | <b>KANC (n = 201)</b> | <b>MoBa (n = 229)</b> | <b>Rhea (n = 199)</b> |
|--------------------------------------------------|----------------------|-----------------------|-----------------------|-----------------------|-----------------------|-----------------------|
| creatinine (umol/L)                              | 6120 ( 4760 - 7920 ) | 7180 ( 6020 - 9060 )  | 6080 ( 4630 - 7810 )  | 5610 ( 4180 - 7100 )  | 5630 ( 4370 - 6800 )  | 5420 ( 4180 - 7180 )  |
| leucine                                          | 2.61 ( 2.1 - 3.26 )  | 2.59 ( 2.14 - 3.06 )  | 3.11 ( 2.39 - 3.86 )  | 2.86 ( 2.33 - 3.42 )  | 2.83 ( 2.32 - 3.45 )  | 3.2 ( 2.56 - 3.92 )   |
| isoleucine                                       | 1.78 ( 1.26 - 2.64 ) | 1.49 ( 1.13 - 1.89 )  | 1.68 ( 1.35 - 2.02 )  | 1.96 ( 1.4 - 2.64 )   | 1.87 ( 1.25 - 2.51 )  | 1.69 ( 1.32 - 2.08 )  |
| valine                                           | 3.74 ( 3.2 - 4.65 )  | 3.54 ( 2.97 - 4.16 )  | 4.13 ( 3.34 - 4.98 )  | 3.96 ( 3.42 - 4.81 )  | 3.84 ( 3.27 - 4.79 )  | 4.46 ( 3.66 - 5.47 )  |
| 3-hydroxyisobutyrate                             | 11.9 ( 9.73 - 15.9 ) | 12.3 ( 10 - 15.1 )    | 13.7 ( 10.7 - 18.2 )  | 12.6 ( 9.82 - 16.7 )  | 12.7 ( 9.95 - 16.3 )  | 14.3 ( 10.8 - 19.1 )  |
| 4-deoxyerythronic acid                           | 10.1 ( 8.33 - 12.7 ) | 10.4 ( 8.78 - 13 )    | 12 ( 9.45 - 14.8 )    | 9.87 ( 7.67 - 12.2 )  | 9.33 ( 7.47 - 11.2 )  | 11.8 ( 9.33 - 15.1 )  |
| 4-deoxythreonic acid                             | 16.4 ( 12.9 - 20.1 ) | 19.1 ( 15.5 - 25.2 )  | 18.5 ( 15.5 - 22.4 )  | 18.4 ( 14.5 - 23.6 )  | 17.7 ( 13.9 - 24.9 )  | 19.1 ( 14.7 - 24.4 )  |
| 2-hydroxyisobutyrate                             | 6.29 ( 5.14 - 7.57 ) | 6.07 ( 5.15 - 7.07 )  | 6.08 ( 5.09 - 7.17 )  | 6.94 ( 5.79 - 8.08 )  | 6.18 ( 5.22 - 7.62 )  | 6.72 ( 5.55 - 8.32 )  |
| alanine                                          | 49.9 ( 39 - 65.4 )   | 40.7 ( 33.1 - 56.3 )  | 50.9 ( 33.8 - 64.2 )  | 47.3 ( 33.8 - 60.9 )  | 44.3 ( 34.1 - 56.7 )  | 49.8 ( 37.5 - 72.3 )  |
| lysine                                           | 33.1 ( 25.8 - 44 )   | 27.7 ( 22.3 - 39.6 )  | 36.3 ( 26.1 - 49.9 )  | 31.6 ( 25.5 - 42.8 )  | 30.6 ( 23.6 - 41.6 )  | 36.8 ( 27.4 - 51.9 )  |
| acetate                                          | 9.17 ( 6.4 - 11.6 )  | 6.51 ( 5.26 - 8.59 )  | 7.39 ( 5.67 - 9.73 )  | 8.19 ( 6.22 - 10.4 )  | 7.84 ( 5.91 - 10.7 )  | 8.25 ( 6.8 - 10.8 )   |
| <i>p</i> -cresol sulfate                         | 60.2 ( 30.8 - 89.7 ) | 41.5 ( 27.4 - 62.5 )  | 46.8 ( 29.1 - 72.5 )  | 50.9 ( 29.5 - 82.2 )  | 46.9 ( 24.7 - 68.8 )  | 44.5 ( 24.1 - 75.2 )  |
| succinate                                        | 17.3 ( 11.3 - 27.7 ) | 12.3 ( 7.44 - 16.9 )  | 15 ( 10 - 23 )        | 20.3 ( 13.9 - 28.3 )  | 18 ( 12.3 - 25.7 )    | 19.1 ( 13 - 27.1 )    |
| glutamine                                        | 134 ( 106 - 166 )    | 125 ( 95.1 - 158 )    | 134 ( 106 - 161 )     | 134 ( 110 - 160 )     | 131 ( 111 - 163 )     | 144 ( 113 - 176 )     |
| citrate                                          | 575 ( 388 - 808 )    | 505 ( 349 - 671 )     | 426 ( 273 - 602 )     | 418 ( 252 - 606 )     | 451 ( 325 - 637 )     | 488 ( 327 - 683 )     |
| dimethylamine                                    | 60.2 ( 53.2 - 70.8 ) | 48 ( 43.9 - 52 )      | 52.3 ( 47.4 - 60.2 )  | 61.1 ( 53.7 - 66.6 )  | 54.8 ( 50 - 64.3 )    | 60.2 ( 52.5 - 66.1 )  |
| trimethylamine                                   | 4.32 ( 3.08 - 6.03 ) | 3.49 ( 2.51 - 4.54 )  | 4.39 ( 3.22 - 5.66 )  | 4.71 ( 3.28 - 6.07 )  | 3.87 ( 2.96 - 5.4 )   | 4.13 ( 3.36 - 5.88 )  |
| trimethylamine <i>N</i> -oxide                   | 55 ( 36.6 - 94.2 )   | 66.1 ( 45.2 - 101 )   | 59.7 ( 40.3 - 110 )   | 55.3 ( 42.5 - 80.9 )  | 71.8 ( 51.3 - 117 )   | 54.2 ( 39.6 - 88.7 )  |
| <i>scyllo</i> -inositol                          | 8.8 ( 6.38 - 12.5 )  | 11.9 ( 7.78 - 18.4 )  | 8.91 ( 5.9 - 13.2 )   | 10.4 ( 7.37 - 14.2 )  | 9.95 ( 7.15 - 15.3 )  | 11.9 ( 9.27 - 16.9 )  |
| taurine                                          | 115 ( 66.2 - 176 )   | 134 ( 88.9 - 189 )    | 166 ( 121 - 234 )     | 114 ( 71.3 - 181 )    | 131 ( 76 - 191 )      | 128 ( 83.8 - 186 )    |
| glycine                                          | 111 ( 78.7 - 158 )   | 91.3 ( 70.6 - 127 )   | 98 ( 69.8 - 131 )     | 87.1 ( 62 - 131 )     | 95.1 ( 71.6 - 125 )   | 95.4 ( 68.3 - 141 )   |
| creatine                                         | 191 ( 91.8 - 341 )   | 136 ( 44.8 - 269 )    | 298 ( 171 - 510 )     | 201 ( 100 - 372 )     | 187 ( 89.3 - 425 )    | 207 ( 124 - 354 )     |
| hippurate                                        | 199 ( 135 - 331 )    | 194 ( 148 - 282 )     | 152 ( 108 - 251 )     | 295 ( 204 - 480 )     | 322 ( 228 - 460 )     | 173 ( 111 - 288 )     |
| formate                                          | 21.9 ( 16.1 - 29.8 ) | 14.3 ( 10.9 - 20.6 )  | 20.1 ( 14.6 - 26.7 )  | 20.6 ( 15.6 - 27.6 )  | 19.1 ( 13.8 - 24.6 )  | 21.7 ( 16.6 - 31.1 )  |

**Supplementary Table 5 Summary of serum metabolite concentrations across the 6 cohorts**

| <b>μmol/L (median with IQR)</b> | <b>BiB (n = 199)</b>    | <b>EDEN (n = 157)</b> | <b>KANC (n = 201)</b> | <b>MoBa (n = 229)</b> | <b>Rhea (n = 199)</b>  | <b>INMA (n = 207)</b>   |
|---------------------------------|-------------------------|-----------------------|-----------------------|-----------------------|------------------------|-------------------------|
| C0                              | 33.9 (28.8 - 38.8)      | 36.6 (32.2 - 40.8)    | 35.3 (31 - 39.9)      | 35.3 (31 - 40.3)      | 34.2 (30.7 - 40.2)     | 36.4 (32.2 - 41.1)      |
| C10                             | 0.23 (0.186 - 0.278)    | 0.177 (0.149 - 0.237) | 0.258 (0.212 - 0.299) | 0.216 (0.177 - 0.268) | 0.221 (0.184 - 0.257)  | 0.202 (0.168 - 0.242)   |
| C10:1                           | 0.11 (0.0835 - 0.142)   | 0.08 (0.067 - 0.097)  | 0.121 (0.098 - 0.148) | 0.096 (0.077 - 0.116) | 0.1 (0.083 - 0.123)    | 0.113 (0.088 - 0.142)   |
| C10:2                           | 0.069 (0.062 - 0.078)   | 0.068 (0.063 - 0.074) | 0.063 (0.058 - 0.068) | 0.067 (0.061 - 0.074) | 0.06 (0.055 - 0.0655)  | 0.059 (0.056 - 0.065)   |
| C12                             | 0.107 (0.089 - 0.13)    | 0.086 (0.077 - 0.111) | 0.122 (0.103 - 0.148) | 0.103 (0.086 - 0.129) | 0.109 (0.091 - 0.126)  | 0.098 (0.083 - 0.119)   |
| C12-DC                          | 0.231 (0.215 - 0.245)   | 0.233 (0.216 - 0.245) | 0.236 (0.219 - 0.248) | 0.23 (0.218 - 0.245)  | 0.232 (0.218 - 0.245)  | 0.232 (0.218 - 0.248)   |
| C12:1                           | 0.111 (0.092 - 0.134)   | 0.094 (0.081 - 0.113) | 0.127 (0.103 - 0.152) | 0.115 (0.092 - 0.141) | 0.12 (0.102 - 0.137)   | 0.107 (0.093 - 0.127)   |
| C14                             | 0.057 (0.051 - 0.062)   | 0.055 (0.048 - 0.06)  | 0.06 (0.055 - 0.067)  | 0.056 (0.051 - 0.063) | 0.057 (0.05 - 0.063)   | 0.056 (0.05 - 0.06)     |
| C14:1                           | 0.04 (0.03 - 0.0585)    | 0.03 (0.024 - 0.046)  | 0.048 (0.037 - 0.063) | 0.042 (0.028 - 0.057) | 0.048 (0.0335 - 0.064) | 0.041 (0.029 - 0.0535)  |
| C14:1-OH                        | 0.017 (0.015 - 0.02)    | 0.016 (0.015 - 0.018) | 0.019 (0.016 - 0.021) | 0.017 (0.015 - 0.02)  | 0.018 (0.016 - 0.021)  | 0.017 (0.015 - 0.019)   |
| C14:2                           | 0.021 (0.016 - 0.03)    | 0.016 (0.013 - 0.021) | 0.024 (0.019 - 0.032) | 0.02 (0.014 - 0.027)  | 0.022 (0.016 - 0.027)  | 0.022 (0.0175 - 0.029)  |
| C14:2-OH                        | 0.02 (0.0175 - 0.022)   | 0.02 (0.017 - 0.022)  | 0.02 (0.018 - 0.023)  | 0.02 (0.016 - 0.022)  | 0.02 (0.017 - 0.022)   | 0.02 (0.0185 - 0.023)   |
| C16                             | 0.093 (0.08 - 0.11)     | 0.082 (0.072 - 0.095) | 0.093 (0.079 - 0.11)  | 0.08 (0.066 - 0.095)  | 0.103 (0.09 - 0.119)   | 0.084 (0.0785 - 0.0945) |
| C16-OH                          | 0.044 (0.039 - 0.05)    | 0.044 (0.04 - 0.049)  | 0.046 (0.039 - 0.05)  | 0.044 (0.037 - 0.049) | 0.045 (0.04 - 0.05)    | 0.046 (0.042 - 0.051)   |
| C16:1                           | 0.026 (0.022 - 0.03)    | 0.024 (0.021 - 0.027) | 0.027 (0.024 - 0.032) | 0.026 (0.022 - 0.031) | 0.028 (0.024 - 0.033)  | 0.025 (0.022 - 0.029)   |
| C16:1-OH                        | 0.014 (0.012 - 0.016)   | 0.013 (0.012 - 0.015) | 0.015 (0.013 - 0.016) | 0.014 (0.012 - 0.016) | 0.015 (0.013 - 0.017)  | 0.013 (0.012 - 0.015)   |
| C16:2                           | 0.015 (0.013 - 0.018)   | 0.013 (0.012 - 0.016) | 0.015 (0.013 - 0.017) | 0.015 (0.012 - 0.016) | 0.015 (0.013 - 0.018)  | 0.015 (0.013 - 0.017)   |
| C16:2-OH                        | 0.026 (0.024 - 0.029)   | 0.025 (0.023 - 0.027) | 0.027 (0.025 - 0.029) | 0.026 (0.023 - 0.027) | 0.026 (0.024 - 0.028)  | 0.026 (0.024 - 0.028)   |
| C18                             | 0.042 (0.036 - 0.051)   | 0.039 (0.034 - 0.046) | 0.044 (0.037 - 0.05)  | 0.04 (0.034 - 0.046)  | 0.044 (0.038 - 0.052)  | 0.039 (0.033 - 0.045)   |
| C18:1                           | 0.096 (0.083 - 0.12)    | 0.078 (0.068 - 0.092) | 0.092 (0.076 - 0.112) | 0.087 (0.073 - 0.104) | 0.116 (0.0915 - 0.138) | 0.092 (0.0785 - 0.111)  |
| C18:2                           | 0.041 (0.0345 - 0.0505) | 0.03 (0.026 - 0.034)  | 0.037 (0.031 - 0.043) | 0.031 (0.027 - 0.037) | 0.04 (0.033 - 0.046)   | 0.04 (0.034 - 0.049)    |
| C2                              | 4.76 (3.66 - 6.72)      | 4.17 (3.49 - 5.17)    | 5.73 (4.52 - 7.72)    | 4.97 (3.75 - 6.92)    | 6.15 (4.45 - 9.1)      | 4.99 (3.88 - 6.59)      |
| C3                              | 0.207 (0.16 - 0.258)    | 0.23 (0.185 - 0.283)  | 0.228 (0.179 - 0.277) | 0.207 (0.166 - 0.263) | 0.216 (0.17 - 0.293)   | 0.247 (0.198 - 0.31)    |
| C3-DC (C4-OH)                   | 0.034 (0.028 - 0.042)   | 0.029 (0.025 - 0.035) | 0.032 (0.027 - 0.04)  | 0.03 (0.025 - 0.037)  | 0.035 (0.03 - 0.045)   | 0.029 (0.025 - 0.036)   |
| C3-OH                           | 0.023 (0.019 - 0.029)   | 0.022 (0.018 - 0.028) | 0.022 (0.019 - 0.028) | 0.023 (0.018 - 0.028) | 0.023 (0.019 - 0.029)  | 0.022 (0.019 - 0.029)   |
| C4                              | 0.103 (0.08 - 0.133)    | 0.111 (0.088 - 0.138) | 0.108 (0.086 - 0.14)  | 0.117 (0.091 - 0.149) | 0.102 (0.082 - 0.138)  | 0.119 (0.0915 - 0.15)   |
| C4:1                            | 0.021 (0.018 - 0.023)   | 0.021 (0.018 - 0.024) | 0.021 (0.018 - 0.023) | 0.021 (0.018 - 0.024) | 0.021 (0.019 - 0.024)  | 0.021 (0.018 - 0.023)   |
| C6 (C4:1-DC)                    | 0.058 (0.0485 - 0.065)  | 0.052 (0.044 - 0.061) | 0.063 (0.053 - 0.073) | 0.055 (0.048 - 0.065) | 0.058 (0.0505 - 0.066) | 0.055 (0.047 - 0.062)   |
| C5                              | 0.111 (0.0905 - 0.136)  | 0.124 (0.104 - 0.153) | 0.119 (0.098 - 0.151) | 0.119 (0.101 - 0.15)  | 0.124 (0.101 - 0.154)  | 0.133 (0.111 - 0.17)    |
| C5-M-DC                         | 0.029 (0.026 - 0.032)   | 0.028 (0.025 - 0.031) | 0.029 (0.026 - 0.033) | 0.03 (0.027 - 0.033)  | 0.03 (0.026 - 0.034)   | 0.028 (0.025 - 0.031)   |
| C5-OH (C3-DC-M)                 | 0.062 (0.058 - 0.067)   | 0.064 (0.059 - 0.069) | 0.063 (0.059 - 0.068) | 0.064 (0.059 - 0.069) | 0.065 (0.06 - 0.0695)  | 0.065 (0.06 - 0.069)    |
| C5:1                            | 0.04 (0.036 - 0.045)    | 0.041 (0.036 - 0.045) | 0.042 (0.037 - 0.046) | 0.043 (0.038 - 0.049) | 0.043 (0.039 - 0.047)  | 0.042 (0.038 - 0.046)   |
| C5:1-DC                         | 0.027 (0.024 - 0.0305)  | 0.027 (0.024 - 0.032) | 0.027 (0.024 - 0.032) | 0.028 (0.024 - 0.031) | 0.027 (0.024 - 0.031)  | 0.027 (0.024 - 0.032)   |
| C5-DC (C6-OH)                   | 0.023 (0.021 - 0.026)   | 0.022 (0.02 - 0.024)  | 0.023 (0.021 - 0.026) | 0.023 (0.02 - 0.026)  | 0.022 (0.02 - 0.025)   | 0.022 (0.02 - 0.024)    |
| C6:1                            | 0.022 (0.019 - 0.024)   | 0.02 (0.018 - 0.022)  | 0.021 (0.019 - 0.024) | 0.021 (0.019 - 0.024) | 0.02 (0.018 - 0.022)   | 0.02 (0.018 - 0.022)    |
| C7-DC                           | 0.055 (0.047 - 0.062)   | 0.048 (0.044 - 0.055) | 0.054 (0.049 - 0.062) | 0.051 (0.046 - 0.058) | 0.051 (0.046 - 0.0575) | 0.051 (0.046 - 0.0575)  |
| C8                              | 0.137 (0.118 - 0.161)   | 0.12 (0.107 - 0.142)  | 0.148 (0.129 - 0.167) | 0.135 (0.114 - 0.16)  | 0.134 (0.118 - 0.152)  | 0.129 (0.11 - 0.146)    |
| C9                              | 0.061 (0.054 - 0.069)   | 0.056 (0.05 - 0.062)  | 0.063 (0.057 - 0.073) | 0.066 (0.058 - 0.078) | 0.058 (0.053 - 0.065)  | 0.055 (0.0495 - 0.061)  |
| Ala                             | 350 (292 - 400)         | 356 (305 - 404)       | 319 (271 - 381)       | 304 (260 - 358)       | 322 (273 - 384)        | 343 (300 - 392)         |
| Arg                             | 102 (89.4 - 118)        | 107 (94 - 120)        | 100 (86.7 - 116)      | 97.2 (88.1 - 112)     | 113 (98.5 - 130)       | 103 (91.2 - 120)        |
| Asn                             | 46.8 (40.8 - 54.4)      | 49.1 (42.5 - 56.4)    | 41 (35.6 - 49.9)      | 44.7 (39.7 - 50.5)    | 49.9 (42.3 - 60.2)     | 46.7 (40.4 - 54.5)      |
| Asp                             | 16 (12.8 - 18.9)        | 10.6 (8.8 - 12.7)     | 11.4 (9.84 - 13.2)    | 11.2 (9.54 - 13)      | 16.8 (14.2 - 20)       | 12 (10.2 - 14.5)        |
| Cit                             | 33.3 (28.7 - 37.5)      | 28.8 (24.8 - 32.4)    | 30.3 (26.9 - 34.7)    | 30.4 (26.5 - 34.6)    | 34.5 (29.9 - 40.8)     | 29.3 (25.6 - 33.6)      |
| Gln                             | 759 (680 - 864)         | 771 (708 - 847)       | 701 (638 - 775)       | 781 (735 - 858)       | 772 (700 - 849)        | 701 (635 - 778)         |
| Glu                             | 53.1 (36.4 - 70.1)      | 37.4 (26.2 - 49.3)    | 61.5 (51.1 - 72.5)    | 38.4 (29.5 - 45.1)    | 60.5 (50.9 - 71.2)     | 45.1 (37.3 - 57.6)      |
| Gly                             | 235 (201 - 273)         | 216 (194 - 239)       | 219 (187 - 250)       | 212 (190 - 244)       | 207 (181 - 236)        | 202 (178 - 231)         |
| His                             | 86.8 (79 - 96.4)        | 87.1 (80.2 - 96.8)    | 84 (77.2 - 94.3)      | 85.1 (79.4 - 92.5)    | 90.4 (80.8 - 97.4)     | 85.6 (76.5 - 95.4)      |
| Ile                             | 66.1 (57.2 - 82.7)      | 72.5 (60.1 - 94.8)    | 72.5 (59.7 - 93.9)    | 70.4 (61.2 - 83.9)    | 93.5 (74.3 - 123)      | 79.8 (62 - 104)         |
| Leu                             | 119 (105 - 150)         | 132 (112 - 164)       | 127 (106 - 159)       | 128 (112 - 149)       | 157 (130 - 204)        | 141 (114 - 170)         |

| <b>μmol/L (median with IQR)</b> | <b>BiB (n = 199)</b>  | <b>EDEN (n = 157)</b> | <b>KANC (n = 201)</b> | <b>MoBa (n = 229)</b> | <b>Rhea (n = 199)</b>  | <b>INMA (n = 207)</b> |
|---------------------------------|-----------------------|-----------------------|-----------------------|-----------------------|------------------------|-----------------------|
| Lys                             | 161 (132 - 194)       | 192 (169 - 229)       | 174 (145 - 208)       | 165 (144 - 195)       | 175 (144 - 222)        | 190 (162 - 228)       |
| Met                             | 18.1 (15.2 - 22.7)    | 20.3 (17.1 - 24.7)    | 18 (15 - 23)          | 17.9 (15.9 - 21.6)    | 20 (15.8 - 26.2)       | 19.7 (16 - 25.4)      |
| Orn                             | 61.2 (52.6 - 73)      | 53.1 (48.1 - 64.6)    | 55.4 (44.7 - 66.6)    | 53.5 (46 - 61.3)      | 67.5 (54.9 - 81.3)     | 57.8 (48 - 68.2)      |
| Phe                             | 65.6 (57.1 - 77.3)    | 64.2 (55.9 - 72.1)    | 61.3 (54.3 - 71.1)    | 61.6 (55.1 - 69.8)    | 75.1 (65.8 - 84.6)     | 67.8 (58.4 - 79.1)    |
| Pro                             | 189 (144 - 231)       | 192 (166 - 239)       | 186 (151 - 233)       | 184 (151 - 230)       | 205 (172 - 250)        | 193 (156 - 244)       |
| Ser                             | 135 (123 - 153)       | 124 (112 - 141)       | 135 (120 - 152)       | 130 (118 - 143)       | 145 (130 - 168)        | 129 (113 - 148)       |
| Thr                             | 107 (90.5 - 125)      | 127 (108 - 149)       | 105 (88.3 - 123)      | 107 (94.2 - 121)      | 116 (98.1 - 144)       | 123 (107 - 141)       |
| Trp                             | 63.4 (54.8 - 77.3)    | 67.9 (60.1 - 80.8)    | 66.5 (58.6 - 77.2)    | 69.4 (61 - 75.1)      | 77.3 (65.6 - 89.1)     | 72.1 (61.5 - 80.2)    |
| Tyr                             | 70.6 (59.2 - 89.9)    | 72.8 (62.8 - 88.8)    | 69.4 (59.5 - 88.7)    | 69.5 (57.6 - 81.1)    | 84.6 (68.4 - 102)      | 78.2 (63.8 - 90.6)    |
| Val                             | 208 (178 - 250)       | 230 (203 - 270)       | 223 (191 - 267)       | 222 (198 - 256)       | 272 (222 - 318)        | 247 (206 - 287)       |
| Ac-Orn                          | 0.569 (0.389 - 0.81)  | 0.571 (0.372 - 0.765) | 0.476 (0.349 - 0.696) | 0.482 (0.313 - 0.642) | 1.2 (0.611 - 2.02)     | 0.642 (0.39 - 1.26)   |
| ADMA                            | 0.581 (0.528 - 0.636) | 0.55 (0.501 - 0.613)  | 0.595 (0.529 - 0.656) | 0.531 (0.495 - 0.585) | 0.597 (0.544 - 0.666)  | 0.542 (0.49 - 0.607)  |
| alpha-AAA                       | 0.73 (0.554 - 0.97)   | 0.867 (0.669 - 1.16)  | 0.847 (0.663 - 1.08)  | 0.809 (0.631 - 0.989) | 0.988 (0.708 - 1.37)   | 1.01 (0.752 - 1.31)   |
| Creatinine                      | 37.4 (33.4 - 42.8)    | 47.5 (42.6 - 52.4)    | 38.2 (34.5 - 42.2)    | 42 (37.8 - 45.6)      | 39.6 (35.7 - 46.8)     | 42.8 (37.4 - 47.6)    |
| Kynurenine                      | 2.4 (2.06 - 2.9)      | 2.4 (2.12 - 2.98)     | 2.59 (2.31 - 2.97)    | 2.5 (2.16 - 2.93)     | 2.53 (2.2 - 2.98)      | 2.47 (2.17 - 2.84)    |
| Met-SO                          | 1.03 (0.732 - 1.38)   | 0.734 (0.61 - 0.91)   | 1.23 (0.97 - 1.48)    | 0.778 (0.673 - 0.967) | 1.28 (0.97 - 1.61)     | 0.945 (0.772 - 1.22)  |
| Putrescine                      | 0.106 (0.078 - 0.134) | 0.092 (0.074 - 0.123) | 0.096 (0.074 - 0.12)  | 0.099 (0.076 - 0.13)  | 0.111 (0.0875 - 0.139) | 0.096 (0.071 - 0.12)  |
| SDMA                            | 0.395 (0.289 - 0.498) | 0.384 (0.279 - 0.477) | 0.426 (0.332 - 0.511) | 0.4 (0.306 - 0.508)   | 0.399 (0.302 - 0.488)  | 0.323 (0.25 - 0.44)   |
| Serotonin                       | 1.34 (0.948 - 1.73)   | 0.775 (0.488 - 1.13)  | 0.697 (0.502 - 0.975) | 0.995 (0.628 - 1.41)  | 1.16 (0.852 - 1.56)    | 0.923 (0.604 - 1.23)  |
| Spermidine                      | 0.163 (0.146 - 0.194) | 0.164 (0.145 - 0.176) | 0.155 (0.138 - 0.177) | 0.163 (0.142 - 0.184) | 0.174 (0.153 - 0.2)    | 0.152 (0.136 - 0.168) |
| Spermine                        | 0.214 (0.2 - 0.228)   | 0.208 (0.197 - 0.222) | 0.213 (0.203 - 0.228) | 0.21 (0.192 - 0.224)  | 0.223 (0.207 - 0.236)  | 0.208 (0.18 - 0.218)  |
| t4-OH-Pro                       | 14.9 (12.9 - 18.4)    | 17.3 (13.6 - 20.6)    | 17.1 (14 - 21.9)      | 15.6 (13.1 - 19.2)    | 15.9 (13.1 - 20.7)     | 17.6 (14.2 - 22.6)    |
| Taurine                         | 89 (64.2 - 114)       | 54.2 (47.3 - 66.9)    | 53.2 (46.9 - 59.6)    | 61.6 (50.9 - 72.6)    | 90.7 (67.1 - 114)      | 58 (50.6 - 76.2)      |
| total DMA                       | 0.831 (0.763 - 0.929) | 0.798 (0.72 - 0.878)  | 0.875 (0.796 - 0.932) | 0.804 (0.739 - 0.894) | 0.822 (0.764 - 0.911)  | 0.749 (0.678 - 0.832) |
| lysoPC a C14:0                  | 2.94 (2.68 - 3.24)    | 3.09 (2.78 - 3.42)    | 2.94 (2.68 - 3.3)     | 3.03 (2.75 - 3.35)    | 2.93 (2.67 - 3.24)     | 2.75 (2.58 - 3.06)    |
| lysoPC a C16:0                  | 65.9 (58.6 - 81.4)    | 61.6 (54.2 - 71.9)    | 60.9 (52.3 - 70.3)    | 61.3 (52.6 - 69.5)    | 68.6 (59.8 - 77.8)     | 60.9 (54 - 70.8)      |
| lysoPC a C16:1                  | 1.71 (1.38 - 2.13)    | 1.8 (1.54 - 2.18)     | 1.62 (1.4 - 1.98)     | 1.78 (1.48 - 2.11)    | 1.69 (1.39 - 2.1)      | 1.59 (1.31 - 1.8)     |
| lysoPC a C17:0                  | 1.15 (0.965 - 1.41)   | 1.22 (1.04 - 1.41)    | 1.11 (0.904 - 1.37)   | 1.27 (1.1 - 1.46)     | 1.04 (0.878 - 1.26)    | 0.999 (0.823 - 1.16)  |
| lysoPC a C18:0                  | 21.3 (18.4 - 25.7)    | 19.8 (16.9 - 22.8)    | 20 (16.4 - 22.6)      | 19.8 (17.4 - 22.4)    | 21 (18.2 - 24.2)       | 20.6 (17.5 - 24)      |
| lysoPC a C18:1                  | 18.7 (14.9 - 23.5)    | 16.6 (13.7 - 20.1)    | 15.6 (13.1 - 19)      | 17.1 (14.2 - 19.9)    | 21.9 (18.2 - 26.4)     | 17 (13.8 - 20.6)      |
| lysoPC a C18:2                  | 39.8 (27.8 - 51.1)    | 33.8 (25.3 - 41.9)    | 33.3 (26.5 - 41.6)    | 32.3 (25.6 - 38.4)    | 44.5 (35.7 - 55.8)     | 38.7 (27.6 - 49.8)    |
| lysoPC a C20:3                  | 2.18 (1.62 - 2.76)    | 1.97 (1.55 - 2.6)     | 1.74 (1.4 - 2.18)     | 1.81 (1.44 - 2.25)    | 2.76 (2.29 - 3.24)     | 2.24 (1.72 - 2.64)    |
| lysoPC a C20:4                  | 5.42 (4.16 - 6.66)    | 5.05 (4.29 - 6.1)     | 4.91 (4.08 - 5.65)    | 4.54 (3.97 - 5.6)     | 6.48 (5.26 - 7.62)     | 5.89 (4.55 - 7.14)    |
| lysoPC a C24:0                  | 0.185 (0.152 - 0.226) | 0.18 (0.146 - 0.226)  | 0.177 (0.149 - 0.217) | 0.194 (0.159 - 0.256) | 0.17 (0.141 - 0.208)   | 0.172 (0.139 - 0.22)  |
| lysoPC a C26:0                  | 0.335 (0.26 - 0.466)  | 0.328 (0.235 - 0.464) | 0.303 (0.242 - 0.443) | 0.307 (0.245 - 0.46)  | 0.34 (0.266 - 0.479)   | 0.314 (0.236 - 0.422) |
| lysoPC a C26:1                  | 0.176 (0.128 - 0.234) | 0.167 (0.122 - 0.23)  | 0.163 (0.127 - 0.23)  | 0.185 (0.133 - 0.245) | 0.165 (0.126 - 0.234)  | 0.166 (0.121 - 0.226) |
| lysoPC a C28:0                  | 0.36 (0.3 - 0.466)    | 0.35 (0.291 - 0.451)  | 0.34 (0.287 - 0.438)  | 0.357 (0.295 - 0.462) | 0.362 (0.316 - 0.476)  | 0.351 (0.289 - 0.43)  |
| lysoPC a C28:1                  | 0.357 (0.29 - 0.442)  | 0.373 (0.315 - 0.475) | 0.366 (0.296 - 0.456) | 0.384 (0.32 - 0.473)  | 0.35 (0.284 - 0.446)   | 0.35 (0.279 - 0.408)  |
| PC aa C24:0                     | 0.148 (0.116 - 0.218) | 0.146 (0.115 - 0.201) | 0.146 (0.113 - 0.195) | 0.148 (0.117 - 0.206) | 0.152 (0.112 - 0.198)  | 0.154 (0.118 - 0.198) |
| PC aa C28:1                     | 2.11 (1.74 - 2.52)    | 2.4 (2.07 - 2.81)     | 2.13 (1.87 - 2.62)    | 2.53 (2.21 - 2.83)    | 2.13 (1.84 - 2.54)     | 2.05 (1.74 - 2.46)    |
| PC aa C30:0                     | 3.32 (2.71 - 3.88)    | 3.67 (3.18 - 4.43)    | 3.41 (2.86 - 4.21)    | 3.59 (3.04 - 4.45)    | 3.41 (2.9 - 4.24)      | 2.94 (2.37 - 3.52)    |
| PC aa C30:2                     | 0.13 (0.053 - 0.202)  | 0.114 (0.049 - 0.187) | 0.113 (0.036 - 0.199) | 0.141 (0.06 - 0.195)  | 0.117 (0.053 - 0.206)  | 0.128 (0.044 - 0.21)  |
| PC aa C32:0                     | 20.9 (18.4 - 24.5)    | 21.3 (19.1 - 23.9)    | 21.4 (19.1 - 24.5)    | 21.5 (18.9 - 24)      | 23.5 (21.2 - 26.8)     | 20.6 (17.8 - 23.2)    |
| PC aa C32:1                     | 19.9 (14.9 - 25)      | 22.1 (18.3 - 27.9)    | 20.1 (16.5 - 25.6)    | 22 (17.3 - 28.4)      | 19.4 (15.2 - 25.2)     | 16.7 (12.4 - 21.2)    |
| PC aa C32:2                     | 6.4 (5.07 - 7.96)     | 6.87 (5.41 - 9.04)    | 6.42 (4.99 - 8.02)    | 6.62 (5.05 - 8.13)    | 6.11 (4.65 - 7.4)      | 6.06 (4.72 - 7.92)    |
| PC aa C32:3                     | 0.788 (0.68 - 0.966)  | 0.842 (0.711 - 1.03)  | 0.801 (0.702 - 0.918) | 0.888 (0.771 - 1.08)  | 0.734 (0.632 - 0.84)   | 0.732 (0.638 - 0.86)  |
| PC aa C34:1                     | 323 (274 - 396)       | 325 (277 - 373)       | 304 (267 - 344)       | 326 (276 - 379)       | 369 (306 - 418)        | 289 (251 - 342)       |
| PC aa C34:2                     | 807 (699 - 948)       | 759 (656 - 856)       | 788 (685 - 882)       | 707 (624 - 806)       | 870 (754 - 994)        | 799 (704 - 914)       |
| PC aa C34:3                     | 26.8 (22.2 - 32.4)    | 24.1 (19.8 - 29.7)    | 23.5 (19.5 - 27.7)    | 25.2 (21.7 - 30.1)    | 21.3 (18 - 25)         | 19 (16.8 - 23.3)      |
| PC aa C34:4                     | 2.52 (1.96 - 3)       | 2.81 (2.27 - 3.61)    | 2.39 (1.91 - 2.95)    | 2.66 (2.15 - 3.29)    | 2.41 (1.94 - 3)        | 2.53 (1.99 - 3.06)    |
| PC aa C36:0                     | 3.6 (3.08 - 4.34)     | 4.08 (3.56 - 4.86)    | 3.87 (3.21 - 4.63)    | 4.58 (3.94 - 5.51)    | 3.58 (2.9 - 4.27)      | 3.89 (3.33 - 4.54)    |



| <b>μmol/L (median with IQR)</b> | <b>BiB (n = 199)</b>  | <b>EDEN (n = 157)</b> | <b>KANC (n = 201)</b> | <b>MoBa (n = 229)</b> | <b>Rhea (n = 199)</b> | <b>INMA (n = 207)</b> |
|---------------------------------|-----------------------|-----------------------|-----------------------|-----------------------|-----------------------|-----------------------|
| PC aa C36:1                     | 59.2 (49.7 - 72.2)    | 61.5 (52.3 - 72.3)    | 56.1 (46.8 - 66.8)    | 65.4 (54.3 - 76.2)    | 66.6 (55.6 - 78.2)    | 57.7 (48.8 - 67.3)    |
| PC aa C36:2                     | 423 (364 - 502)       | 408 (350 - 455)       | 419 (363 - 468)       | 398 (354 - 453)       | 440 (390 - 494)       | 442 (392 - 506)       |
| PC aa C36:3                     | 198 (174 - 233)       | 194 (164 - 219)       | 186 (159 - 212)       | 185 (165 - 215)       | 220 (194 - 252)       | 204 (178 - 234)       |
| PC aa C36:4                     | 255 (212 - 296)       | 257 (229 - 294)       | 246 (218 - 275)       | 231 (205 - 267)       | 283 (241 - 332)       | 277 (234 - 326)       |
| PC aa C36:5                     | 25.5 (19.5 - 33.8)    | 25.2 (20.3 - 32.4)    | 20.6 (16.2 - 26.7)    | 36.2 (28.5 - 54.2)    | 16.1 (12.6 - 20.7)    | 14.6 (11.1 - 19.8)    |
| PC aa C36:6                     | 1.11 (0.882 - 1.48)   | 1.42 (1.14 - 1.75)    | 1.07 (0.851 - 1.42)   | 1.77 (1.41 - 2.27)    | 0.897 (0.734 - 1.1)   | 1 (0.799 - 1.2)       |
| PC aa C38:0                     | 3.21 (2.59 - 3.91)    | 3.81 (3.14 - 4.45)    | 3.63 (3.12 - 4.44)    | 4.69 (3.99 - 5.43)    | 3.19 (2.66 - 3.8)     | 3.98 (3.2 - 4.58)     |
| PC aa C38:1                     | 1.21 (1.01 - 1.54)    | 1.24 (0.991 - 1.54)   | 1.2 (0.978 - 1.48)    | 1.67 (1.38 - 2.03)    | 1.16 (0.888 - 1.43)   | 1.14 (0.878 - 1.44)   |
| PC aa C38:3                     | 56.6 (46 - 66.7)      | 58.1 (49.2 - 69.9)    | 50.8 (42.9 - 58.8)    | 55.4 (48 - 65.3)      | 59.7 (52.1 - 71)      | 59.9 (51.3 - 70.4)    |
| PC aa C38:4                     | 129 (104 - 150)       | 133 (118 - 150)       | 126 (109 - 148)       | 124 (105 - 140)       | 137 (116 - 162)       | 149 (124 - 176)       |
| PC aa C38:5                     | 61.2 (50.7 - 73.6)    | 59.2 (52.4 - 67.4)    | 57 (48.9 - 67)        | 67.7 (58.1 - 78.3)    | 55.4 (47.4 - 63.8)    | 51.5 (43.2 - 62.8)    |
| PC aa C38:6                     | 80.8 (66.4 - 98.6)    | 95.2 (79.5 - 111)     | 80.5 (67.1 - 98.2)    | 118 (98.5 - 142)      | 69.8 (58.6 - 86.6)    | 80.7 (67.4 - 95.4)    |
| PC aa C40:1                     | 0.494 (0.441 - 0.568) | 0.472 (0.428 - 0.532) | 0.497 (0.455 - 0.551) | 0.564 (0.503 - 0.628) | 0.466 (0.414 - 0.51)  | 0.499 (0.444 - 0.562) |
| PC aa C40:2                     | 0.391 (0.332 - 0.46)  | 0.354 (0.309 - 0.4)   | 0.361 (0.33 - 0.407)  | 0.404 (0.353 - 0.473) | 0.356 (0.322 - 0.406) | 0.367 (0.317 - 0.431) |
| PC aa C40:3                     | 0.593 (0.496 - 0.677) | 0.544 (0.488 - 0.61)  | 0.54 (0.471 - 0.6)    | 0.613 (0.557 - 0.696) | 0.546 (0.49 - 0.625)  | 0.537 (0.469 - 0.61)  |
| PC aa C40:4                     | 3.73 (3.12 - 4.42)    | 3.69 (3.19 - 4.37)    | 3.8 (3.3 - 4.35)      | 3.54 (3.1 - 4.1)      | 4.05 (3.46 - 4.68)    | 4.12 (3.42 - 4.88)    |
| PC aa C40:5                     | 9.82 (7.92 - 11.7)    | 9.52 (8.08 - 11.2)    | 9.31 (8.11 - 10.7)    | 9.48 (8.09 - 11.3)    | 8.45 (7.38 - 9.86)    | 7.98 (6.58 - 9.59)    |
| PC aa C40:6                     | 24.7 (20.4 - 30.2)    | 30 (24.2 - 34.6)      | 24.6 (20.2 - 29.8)    | 36.2 (30.5 - 44.3)    | 20.3 (17.2 - 25)      | 25.2 (20.6 - 29.4)    |
| PC aa C42:0                     | 0.539 (0.444 - 0.65)  | 0.551 (0.485 - 0.634) | 0.557 (0.484 - 0.64)  | 0.647 (0.555 - 0.764) | 0.506 (0.432 - 0.604) | 0.552 (0.474 - 0.653) |
| PC aa C42:1                     | 0.286 (0.244 - 0.34)  | 0.288 (0.24 - 0.333)  | 0.29 (0.248 - 0.336)  | 0.328 (0.276 - 0.388) | 0.261 (0.226 - 0.308) | 0.308 (0.255 - 0.36)  |
| PC aa C42:2                     | 0.24 (0.204 - 0.277)  | 0.226 (0.201 - 0.252) | 0.215 (0.188 - 0.25)  | 0.252 (0.229 - 0.293) | 0.203 (0.183 - 0.24)  | 0.233 (0.196 - 0.264) |
| PC aa C42:4                     | 0.171 (0.152 - 0.202) | 0.172 (0.15 - 0.193)  | 0.174 (0.156 - 0.196) | 0.171 (0.151 - 0.193) | 0.177 (0.154 - 0.199) | 0.181 (0.156 - 0.208) |
| PC aa C42:5                     | 0.35 (0.292 - 0.428)  | 0.322 (0.281 - 0.372) | 0.341 (0.305 - 0.384) | 0.371 (0.326 - 0.431) | 0.277 (0.236 - 0.31)  | 0.261 (0.226 - 0.3)   |
| PC aa C42:6                     | 0.554 (0.489 - 0.643) | 0.517 (0.457 - 0.601) | 0.52 (0.453 - 0.614)  | 0.675 (0.602 - 0.782) | 0.45 (0.394 - 0.514)  | 0.451 (0.398 - 0.515) |
| PC ae C30:0                     | 0.347 (0.294 - 0.422) | 0.436 (0.373 - 0.505) | 0.416 (0.357 - 0.495) | 0.423 (0.348 - 0.492) | 0.371 (0.318 - 0.443) | 0.327 (0.278 - 0.396) |
| PC ae C30:1                     | 0.24 (0.179 - 0.366)  | 0.289 (0.204 - 0.369) | 0.268 (0.178 - 0.357) | 0.291 (0.212 - 0.38)  | 0.258 (0.201 - 0.35)  | 0.254 (0.19 - 0.344)  |
| PC ae C30:2                     | 0.088 (0.072 - 0.112) | 0.098 (0.084 - 0.12)  | 0.092 (0.078 - 0.11)  | 0.099 (0.084 - 0.115) | 0.084 (0.07 - 0.105)  | 0.088 (0.075 - 0.105) |
| PC ae C32:1                     | 4.55 (3.74 - 5.34)    | 4.99 (4.4 - 5.63)     | 4.82 (4.35 - 5.63)    | 4.72 (4.02 - 5.58)    | 5.3 (4.28 - 5.92)     | 4.73 (4.11 - 5.38)    |
| PC ae C32:2                     | 1.04 (0.851 - 1.24)   | 1.2 (1.04 - 1.35)     | 1.1 (0.983 - 1.29)    | 1.23 (1.08 - 1.42)    | 1.09 (0.944 - 1.31)   | 1.12 (0.968 - 1.29)   |
| PC ae C34:0                     | 1.93 (1.6 - 2.36)     | 2.35 (1.96 - 2.79)    | 2.12 (1.78 - 2.52)    | 2.36 (2.01 - 2.76)    | 2.02 (1.73 - 2.4)     | 1.83 (1.49 - 2.16)    |
| PC ae C34:1                     | 16 (13.1 - 18.6)      | 16.9 (15 - 19.4)      | 16.6 (14.7 - 19.1)    | 17.1 (15.1 - 19.1)    | 17.8 (15.3 - 19.8)    | 15.5 (13 - 17.4)      |
| PC ae C34:2                     | 19 (15.9 - 22.6)      | 20.3 (17.6 - 23.7)    | 21.8 (18.4 - 26)      | 19.4 (16.7 - 22.5)    | 21.7 (18.3 - 25.6)    | 22.5 (19 - 26.6)      |
| PC ae C34:3                     | 15.7 (13.2 - 19.2)    | 16.3 (13.9 - 18.8)    | 16.6 (14.3 - 19.6)    | 15.3 (12.9 - 18)      | 17.6 (14.4 - 20.6)    | 17.3 (13.8 - 20.4)    |
| PC ae C36:0                     | 1.18 (0.989 - 1.38)   | 1.27 (1.12 - 1.4)     | 1.16 (1.03 - 1.34)    | 1.36 (1.19 - 1.57)    | 1.24 (1.08 - 1.4)     | 1.16 (1 - 1.33)       |
| PC ae C36:1                     | 10.3 (8.49 - 12.6)    | 11.2 (9.94 - 13)      | 10.6 (8.89 - 12.1)    | 11.8 (10.2 - 13.4)    | 10.4 (8.72 - 12.2)    | 9.25 (8.06 - 10.7)    |
| PC ae C36:2                     | 21 (17.6 - 25.3)      | 21.8 (19.6 - 25.6)    | 22.8 (19.4 - 25.6)    | 23 (20.1 - 25.9)      | 20.7 (18 - 24.2)      | 20.4 (17.8 - 23.4)    |
| PC ae C36:3                     | 12.5 (10.6 - 15.2)    | 13.2 (11.7 - 14.9)    | 13.7 (11.8 - 16)      | 13.3 (11.7 - 15.2)    | 14.4 (12.2 - 17.3)    | 14.8 (12.6 - 17.3)    |
| PC ae C36:4                     | 24.1 (20.8 - 28.2)    | 29.2 (25.7 - 33.2)    | 30 (25.7 - 36.2)      | 24.9 (21.6 - 29.8)    | 31.7 (25.8 - 37)      | 33.7 (28.4 - 40.2)    |
| PC ae C36:5                     | 16.2 (13.2 - 18.8)    | 19.5 (15.9 - 23.1)    | 18.1 (15.2 - 21.9)    | 17.2 (14.8 - 20.8)    | 19 (15.6 - 22.4)      | 20.5 (16.5 - 23.7)    |
| PC ae C38:0                     | 2.29 (1.94 - 2.83)    | 2.66 (2.22 - 2.9)     | 2.22 (1.84 - 2.62)    | 3.27 (2.74 - 4.04)    | 1.84 (1.62 - 2.2)     | 2.03 (1.69 - 2.31)    |
| PC ae C38:1                     | 0.728 (0.566 - 0.995) | 0.694 (0.563 - 0.876) | 0.655 (0.513 - 0.821) | 0.655 (0.677 - 1.05)  | 0.631 (0.463 - 0.838) | 0.663 (0.484 - 0.876) |
| PC ae C38:2                     | 2.91 (2.48 - 3.56)    | 2.81 (2.38 - 3.17)    | 2.94 (2.46 - 3.43)    | 3.08 (2.66 - 3.43)    | 2.98 (2.56 - 3.34)    | 2.79 (2.44 - 3.22)    |
| PC ae C38:3                     | 5.39 (4.38 - 6.36)    | 5.59 (4.98 - 6.53)    | 5.15 (4.53 - 6.05)    | 5.72 (4.97 - 6.44)    | 5.56 (4.66 - 6.33)    | 5.26 (4.54 - 5.92)    |
| PC ae C38:4                     | 17.8 (15.2 - 20.8)    | 20.1 (18 - 22.4)      | 20.6 (17.9 - 23.5)    | 18.8 (16.1 - 21.6)    | 20.7 (17.5 - 24.1)    | 20.9 (17.6 - 24)      |
| PC ae C38:5                     | 22.9 (19.8 - 27)      | 25.5 (22.9 - 28.9)    | 26.9 (23.2 - 30.9)    | 25.7 (22.1 - 29.6)    | 28 (23.6 - 32.9)      | 29.4 (24.7 - 35.2)    |
| PC ae C38:6                     | 8.35 (7 - 10.2)       | 10.5 (8.91 - 12.1)    | 9.7 (8.38 - 12.2)     | 11.4 (9.51 - 13.4)    | 8.94 (7.28 - 10.7)    | 10.5 (8.43 - 12.4)    |
| PC ae C40:1                     | 1.41 (1.19 - 1.76)    | 1.5 (1.31 - 1.73)     | 1.35 (1.09 - 1.55)    | 1.7 (1.45 - 1.93)     | 1.37 (1.17 - 1.67)    | 1.46 (1.26 - 1.73)    |
| PC ae C40:2                     | 1.62 (1.36 - 1.94)    | 1.66 (1.46 - 1.86)    | 1.59 (1.39 - 1.86)    | 1.94 (1.68 - 2.28)    | 1.43 (1.24 - 1.62)    | 1.3 (1.12 - 1.46)     |
| PC ae C40:3                     | 1.23 (1.02 - 1.43)    | 1.15 (1.04 - 1.3)     | 1.17 (1.03 - 1.29)    | 1.24 (1.13 - 1.41)    | 1.19 (1.07 - 1.34)    | 1.16 (1 - 1.32)       |
| PC ae C40:4                     | 2.7 (2.31 - 3.2)      | 2.87 (2.46 - 3.13)    | 2.92 (2.62 - 3.34)    | 2.68 (2.35 - 3.06)    | 3 (2.56 - 3.45)       | 2.89 (2.51 - 3.34)    |
| PC ae C40:5                     | 4.32 (3.62 - 4.98)    | 4.36 (3.81 - 4.93)    | 4.57 (4.09 - 5.23)    | 4.58 (4.09 - 5.26)    | 4.46 (3.84 - 5.02)    | 4.5 (3.74 - 5.13)     |

| <b>μmol/L (median with IQR)</b> | <b>BiB (n = 199)</b>    | <b>EDEN (n = 157)</b>   | <b>KANC (n = 201)</b>   | <b>MoBa (n = 229)</b>   | <b>Rhea (n = 199)</b>   | <b>INMA (n = 207)</b>   |
|---------------------------------|-------------------------|-------------------------|-------------------------|-------------------------|-------------------------|-------------------------|
| PC ae C40:6                     | 5.13 ( 4.07 - 5.75 )    | 5.89 ( 5.03 - 6.79 )    | 5.57 ( 4.93 - 6.64 )    | 7.01 ( 6.05 - 8.27 )    | 4.71 ( 4.06 - 5.58 )    | 5.24 ( 4.53 - 6.06 )    |
| PC ae C42:0                     | 0.837 ( 0.79 - 0.928 )  | 0.817 ( 0.759 - 0.874 ) | 0.822 ( 0.763 - 0.886 ) | 0.913 ( 0.854 - 0.984 ) | 0.789 ( 0.745 - 0.858 ) | 0.816 ( 0.758 - 0.88 )  |
| PC ae C42:1                     | 0.493 ( 0.424 - 0.594 ) | 0.465 ( 0.407 - 0.535 ) | 0.466 ( 0.405 - 0.541 ) | 0.5 ( 0.433 - 0.565 )   | 0.474 ( 0.417 - 0.559 ) | 0.525 ( 0.444 - 0.605 ) |
| PC ae C42:2                     | 0.591 ( 0.494 - 0.719 ) | 0.579 ( 0.499 - 0.65 )  | 0.569 ( 0.485 - 0.658 ) | 0.676 ( 0.565 - 0.771 ) | 0.556 ( 0.487 - 0.636 ) | 0.511 ( 0.436 - 0.588 ) |
| PC ae C42:3                     | 0.83 ( 0.704 - 0.981 )  | 0.772 ( 0.683 - 0.884 ) | 0.76 ( 0.664 - 0.87 )   | 0.919 ( 0.799 - 1.06 )  | 0.765 ( 0.639 - 0.884 ) | 0.77 ( 0.658 - 0.88 )   |
| PC ae C42:4                     | 0.857 ( 0.734 - 1.03 )  | 0.859 ( 0.742 - 0.986 ) | 0.911 ( 0.81 - 1.04 )   | 0.852 ( 0.753 - 0.986 ) | 0.906 ( 0.746 - 1.04 )  | 0.871 ( 0.736 - 1.01 )  |
| PC ae C42:5                     | 1.98 ( 1.65 - 2.36 )    | 2.03 ( 1.82 - 2.3 )     | 2.09 ( 1.82 - 2.42 )    | 2.14 ( 1.87 - 2.48 )    | 2.07 ( 1.78 - 2.37 )    | 2.13 ( 1.75 - 2.44 )    |
| PC ae C44:3                     | 0.158 ( 0.13 - 0.184 )  | 0.149 ( 0.129 - 0.179 ) | 0.149 ( 0.125 - 0.168 ) | 0.163 ( 0.137 - 0.186 ) | 0.144 ( 0.119 - 0.17 )  | 0.148 ( 0.126 - 0.179 ) |
| PC ae C44:4                     | 0.324 ( 0.284 - 0.39 )  | 0.33 ( 0.298 - 0.379 )  | 0.333 ( 0.288 - 0.381 ) | 0.347 ( 0.299 - 0.393 ) | 0.347 ( 0.3 - 0.4 )     | 0.319 ( 0.278 - 0.373 ) |
| PC ae C44:5                     | 1.33 ( 1.09 - 1.6 )     | 1.43 ( 1.21 - 1.69 )    | 1.41 ( 1.2 - 1.63 )     | 1.43 ( 1.23 - 1.73 )    | 1.44 ( 1.22 - 1.68 )    | 1.44 ( 1.16 - 1.68 )    |
| PC ae C44:6                     | 0.968 ( 0.815 - 1.17 )  | 0.979 ( 0.821 - 1.17 )  | 1.07 ( 0.894 - 1.24 )   | 1.07 ( 0.902 - 1.26 )   | 0.945 ( 0.806 - 1.15 )  | 1.13 ( 0.939 - 1.3 )    |
| SM (OH) C14:1                   | 4.21 ( 3.4 - 4.86 )     | 5.17 ( 4.48 - 6.01 )    | 4.84 ( 4.05 - 5.6 )     | 4.77 ( 4.18 - 5.4 )     | 4.14 ( 3.61 - 4.95 )    | 4.05 ( 3.4 - 4.54 )     |
| SM (OH) C16:1                   | 2.14 ( 1.82 - 2.55 )    | 2.77 ( 2.39 - 3.23 )    | 2.58 ( 2.16 - 2.97 )    | 2.71 ( 2.3 - 3.04 )     | 2.19 ( 1.88 - 2.57 )    | 2.19 ( 1.88 - 2.5 )     |
| SM (OH) C22:1                   | 6.74 ( 5.59 - 7.98 )    | 7.29 ( 6.24 - 8.5 )     | 7.38 ( 6.22 - 8.91 )    | 6.54 ( 5.6 - 7.85 )     | 8.22 ( 6.95 - 9.55 )    | 6.97 ( 5.92 - 8.32 )    |
| SM (OH) C22:2                   | 5.48 ( 4.46 - 6.38 )    | 6.2 ( 5.2 - 7.15 )      | 5.66 ( 4.74 - 6.95 )    | 5.87 ( 5.02 - 6.98 )    | 5.67 ( 4.8 - 6.62 )     | 5.27 ( 4.34 - 6.14 )    |
| SM (OH) C24:1                   | 0.542 ( 0.452 - 0.65 )  | 0.587 ( 0.487 - 0.71 )  | 0.584 ( 0.473 - 0.71 )  | 0.577 ( 0.474 - 0.672 ) | 0.608 ( 0.528 - 0.697 ) | 0.534 ( 0.434 - 0.64 )  |
| SM C16:0                        | 89.2 ( 78.3 - 102 )     | 92.5 ( 83.2 - 102 )     | 91 ( 83.1 - 102 )       | 87.8 ( 80.6 - 97.7 )    | 95.7 ( 84.7 - 106 )     | 92.2 ( 80.6 - 102 )     |
| SM C16:1                        | 11 ( 9.57 - 12.6 )      | 12.1 ( 10.7 - 13.6 )    | 11.1 ( 9.67 - 12.8 )    | 11 ( 9.92 - 12.5 )      | 11.7 ( 10.4 - 13.4 )    | 12 ( 10.6 - 13.2 )      |
| SM C18:0                        | 15.1 ( 13.1 - 17.8 )    | 17.2 ( 15.3 - 19.9 )    | 16.4 ( 14.2 - 19 )      | 16.8 ( 14.4 - 19.6 )    | 16.6 ( 14.4 - 18.9 )    | 16.2 ( 13.1 - 18.5 )    |
| SM C18:1                        | 7.16 ( 6.12 - 8.16 )    | 8.47 ( 7.55 - 9.62 )    | 7.77 ( 6.87 - 9.12 )    | 7.87 ( 6.92 - 9.27 )    | 7.77 ( 6.68 - 8.9 )     | 8.11 ( 6.86 - 9.07 )    |
| SM C20:2                        | 0.304 ( 0.248 - 0.362 ) | 0.317 ( 0.264 - 0.373 ) | 0.334 ( 0.292 - 0.4 )   | 0.325 ( 0.28 - 0.388 )  | 0.325 ( 0.269 - 0.384 ) | 0.346 ( 0.286 - 0.42 )  |
| SM C24:0                        | 10.5 ( 8.8 - 12.2 )     | 10.1 ( 8.62 - 12.2 )    | 10.6 ( 9.09 - 12.5 )    | 9.81 ( 8.32 - 11.5 )    | 11.2 ( 9.64 - 12.8 )    | 10.6 ( 8.95 - 12.6 )    |
| SM C24:1                        | 22 ( 17.3 - 25.7 )      | 21.3 ( 18.3 - 24.2 )    | 20.9 ( 17.6 - 24.6 )    | 21.1 ( 18.5 - 26.1 )    | 20.2 ( 17.1 - 23.4 )    | 19.6 ( 15.8 - 23.2 )    |
| SM C26:0                        | 0.076 ( 0.0605 - 0.09 ) | 0.079 ( 0.065 - 0.097 ) | 0.081 ( 0.065 - 0.101 ) | 0.088 ( 0.072 - 0.107 ) | 0.084 ( 0.067 - 0.1 )   | 0.077 ( 0.055 - 0.094 ) |
| SM C26:1                        | 0.135 ( 0.114 - 0.168 ) | 0.145 ( 0.118 - 0.169 ) | 0.148 ( 0.119 - 0.18 )  | 0.178 ( 0.14 - 0.213 )  | 0.138 ( 0.11 - 0.164 )  | 0.132 ( 0.109 - 0.162 ) |
| H1                              | 3880 ( 3530 - 4200 )    | 4200 ( 3910 - 4630 )    | 4080 ( 3840 - 4380 )    | 4010 ( 3740 - 4280 )    | 4100 ( 3820 - 4390 )    | 3990 ( 3710 - 4340 )    |

### Supplementary Table 6 Metabolites associated with age

| metabolite         | effect size (SD/ year) | lower CI | upper CI | p-value | I <sup>2</sup> |
|--------------------|------------------------|----------|----------|---------|----------------|
| creatinine (urine) | 0.39                   | 0.26     | 0.53     | 4.4E-09 | 0%             |
| Creatinine (serum) | 0.30                   | 0.17     | 0.43     | 7.3E-06 | 23%            |

### Supplementary Table 7 Metabolites associated with sex

| metabolite           | effect size (SD) | lower CI | upper CI | p-value | I <sup>2</sup> |
|----------------------|------------------|----------|----------|---------|----------------|
| isoleucine (urine)   | -0.24            | -0.37    | -0.12    | 1.1E-04 | 59%            |
| 5-oxoproline (urine) | 0.23             | 0.11     | 0.36     | 2.3E-04 | 0%             |
| tyrosine (urine)     | 0.43             | 0.31     | 0.55     | 3.7E-12 | 9%             |
| C10                  | -0.23            | -0.35    | -0.11    | 2.6E-04 | 29%            |
| C12                  | -0.29            | -0.41    | -0.17    | 1.8E-06 | 27%            |
| C14:1                | -0.34            | -0.46    | -0.22    | 5.8E-08 | 19%            |
| C14:1-OH             | -0.22            | -0.34    | -0.10    | 2.6E-04 | 19%            |
| C14:2                | -0.24            | -0.36    | -0.12    | 7.9E-05 | 17%            |
| C16:1                | -0.26            | -0.38    | -0.14    | 3.0E-05 | 15%            |
| Lys                  | -0.24            | -0.35    | -0.12    | 1.1E-04 | 53%            |
| Orn                  | -0.35            | -0.47    | -0.23    | 1.4E-08 | 18%            |
| Ser                  | -0.26            | -0.39    | -0.14    | 2.1E-05 | 5%             |
| Putrescine           | -0.21            | -0.33    | -0.10    | 2.8E-04 | 55%            |
| Serotonin            | 0.32             | 0.20     | 0.44     | 1.8E-07 | 49%            |
| SM C16:1             | -0.35            | -0.46    | -0.24    | 3.2E-10 | 0%             |
| SM C18:0             | -0.22            | -0.33    | -0.11    | 9.2E-05 | 0%             |
| SM C18:1             | -0.35            | -0.46    | -0.24    | 1.8E-10 | 0%             |
| H1                   | 0.23             | 0.11     | 0.35     | 2.4E-04 | 8%             |

Metabolites found higher in male children are shown as positive and metabolites found higher in female children are shown as negative

**Supplementary Table 8 Metabolites associated with z-BMI score**

| metabolite                       | effect size (SD/ unit z-score) | lower CI | upper CI | p-value | I <sup>2</sup> |
|----------------------------------|--------------------------------|----------|----------|---------|----------------|
| valine (urine)                   | 0.09                           | 0.04     | 0.15     | 4.1E-04 | 0%             |
| 4-deoxyerythronic acid (urine)   | 0.21                           | 0.16     | 0.26     | 8.1E-16 | 40%            |
| <i>p</i> -cresol sulfate (urine) | -0.10                          | -0.16    | -0.05    | 1.1E-04 | 63%            |
| pantothenate (urine)             | -0.12                          | -0.17    | -0.07    | 2.0E-06 | 13%            |
| C0                               | 0.18                           | 0.13     | 0.24     | 1.4E-12 | 0%             |
| C18                              | -0.13                          | -0.18    | -0.08    | 1.1E-06 | 14%            |
| C3                               | 0.15                           | 0.10     | 0.20     | 7.6E-10 | 0%             |
| C5                               | 0.13                           | 0.08     | 0.18     | 1.0E-06 | 0%             |
| Asp                              | 0.10                           | 0.05     | 0.15     | 1.5E-04 | 20%            |
| Glu                              | 0.22                           | 0.17     | 0.27     | 3.3E-17 | 0%             |
| Leu                              | 0.11                           | 0.06     | 0.16     | 4.3E-05 | 0%             |
| Lys                              | 0.10                           | 0.05     | 0.15     | 2.1E-04 | 0%             |
| Phe                              | 0.12                           | 0.07     | 0.17     | 3.4E-06 | 23%            |
| Pro                              | 0.10                           | 0.05     | 0.15     | 1.2E-04 | 0%             |
| Val                              | 0.12                           | 0.07     | 0.18     | 2.5E-06 | 0%             |
| ADMA                             | 0.09                           | 0.04     | 0.15     | 2.7E-04 | 0%             |
| alpha-AAA                        | 0.10                           | 0.05     | 0.15     | 8.7E-05 | 0%             |
| Kynurenine                       | 0.10                           | 0.05     | 0.15     | 1.1E-04 | 36%            |
| lysoPC a C14:0                   | 0.09                           | 0.04     | 0.14     | 2.6E-04 | 0%             |
| lysoPC a C16:1                   | 0.14                           | 0.09     | 0.19     | 1.1E-07 | 0%             |
| lysoPC a C18:1                   | -0.09                          | -0.14    | -0.05    | 1.8E-04 | 0%             |
| lysoPC a C18:2                   | -0.12                          | -0.17    | -0.07    | 4.9E-06 | 0%             |
| PC aa C32:1                      | 0.11                           | 0.06     | 0.16     | 1.4E-05 | 0%             |
| PC aa C32:3                      | 0.10                           | 0.05     | 0.15     | 5.9E-05 | 0%             |
| PC aa C34:4                      | 0.14                           | 0.08     | 0.19     | 2.3E-07 | 0%             |
| PC aa C36:5                      | 0.10                           | 0.05     | 0.15     | 1.5E-04 | 0%             |
| PC aa C36:6                      | 0.10                           | 0.04     | 0.15     | 2.6E-04 | 0%             |
| PC aa C38:1                      | -0.10                          | -0.15    | -0.05    | 8.2E-05 | 38%            |
| PC aa C38:3                      | 0.20                           | 0.15     | 0.25     | 5.6E-16 | 0%             |
| PC aa C38:4                      | 0.14                           | 0.08     | 0.19     | 1.5E-07 | 0%             |
| PC aa C40:6                      | 0.10                           | 0.05     | 0.15     | 1.2E-04 | 0%             |
| PC ae C34:0                      | -0.10                          | -0.14    | -0.05    | 1.8E-04 | 0%             |
| PC ae C34:1                      | -0.09                          | -0.14    | -0.04    | 2.2E-04 | 0%             |
| PC ae C36:0                      | -0.10                          | -0.15    | -0.05    | 2.4E-05 | 0%             |
| PC ae C36:2                      | -0.12                          | -0.17    | -0.07    | 2.6E-06 | 0%             |
| PC ae C38:2                      | -0.10                          | -0.15    | -0.05    | 5.6E-05 | 3%             |
| PC ae C40:4                      | -0.11                          | -0.16    | -0.06    | 2.4E-05 | 23%            |
| PC ae C40:5                      | -0.10                          | -0.15    | -0.05    | 1.1E-04 | 12%            |
| PC ae C40:6                      | -0.10                          | -0.15    | -0.05    | 1.5E-04 | 0%             |
| PC ae C42:3                      | -0.11                          | -0.16    | -0.06    | 1.6E-05 | 0%             |
| PC ae C42:4                      | -0.14                          | -0.19    | -0.09    | 1.7E-07 | 0%             |
| PC ae C44:4                      | -0.11                          | -0.16    | -0.05    | 5.7E-05 | 21%            |
| SM C16:0                         | -0.10                          | -0.14    | -0.05    | 7.3E-05 | 18%            |
| SM C16:1                         | 0.16                           | 0.11     | 0.21     | 1.3E-11 | 0%             |
| SM C18:1                         | 0.16                           | 0.11     | 0.20     | 6.0E-11 | 0%             |

**Supplementary Table 9 Metabolites associated with dietary intake**

| metabolite-diet pair                                         | effect size (SD/ times per week) | lower CI | upper CI | p-value | I <sup>2</sup> |
|--------------------------------------------------------------|----------------------------------|----------|----------|---------|----------------|
| creatine (urine) with meat                                   | 0.025                            | 0.012    | 0.039    | 2.9E-04 | 0%             |
| pantothenate (urine) with dairy                              | 0.009                            | 0.004    | 0.015    | 7.3E-04 | 39%            |
| acetate (urine) with potatoes                                | 0.045                            | 0.023    | 0.068    | 1.0E-04 | 0%             |
| hippurate (urine) with vegetables                            | 0.021                            | 0.011    | 0.031    | 2.0E-05 | 4%             |
| leucine (urine) with fruits                                  | -0.014                           | -0.022   | -0.006   | 5.3E-04 | 0%             |
| alanine (urine) with fruits                                  | -0.014                           | -0.022   | -0.006   | 7.7E-04 | 28%            |
| glutamine (urine) with fruits                                | -0.013                           | -0.021   | -0.005   | 9.3E-04 | 0%             |
| scyllo-inositol (urine) with fruits                          | 0.014                            | 0.007    | 0.021    | 9.0E-05 | 61%            |
| hippurate (urine) with fruits                                | 0.026                            | 0.018    | 0.034    | 4.4E-11 | 52%            |
| proline betaine (urine) with fruits                          | 0.017                            | 0.009    | 0.025    | 3.9E-05 | 0%             |
| N-methylnicotinic acid (urine) with fruits                   | 0.017                            | 0.009    | 0.025    | 4.1E-05 | 61%            |
| 3-hydroxybutyrate/ 3-aminoisobutyrate (urine) with beverages | -0.049                           | -0.067   | -0.030   | 2.2E-07 | 48%            |
| PC ae C36:3 with meat                                        | 0.024                            | 0.011    | 0.037    | 2.1E-04 | 0%             |
| PC ae C36:4 with meat                                        | 0.031                            | 0.018    | 0.044    | 3.5E-06 | 5%             |
| PC ae C36:5 with meat                                        | 0.026                            | 0.013    | 0.040    | 1.1E-04 | 0%             |
| PC ae C38:5 with meat                                        | 0.027                            | 0.014    | 0.040    | 5.6E-05 | 23%            |
| PC aa C36:0 with fish                                        | 0.091                            | 0.063    | 0.119    | 9.6E-11 | 56%            |
| PC aa C36:5 with fish                                        | 0.062                            | 0.034    | 0.090    | 1.5E-05 | 44%            |
| PC aa C36:6 with fish                                        | 0.086                            | 0.058    | 0.114    | 1.2E-09 | 0%             |
| PC aa C38:0 with fish                                        | 0.107                            | 0.080    | 0.134    | 1.3E-14 | 74%            |
| PC aa C38:6 with fish                                        | 0.112                            | 0.084    | 0.140    | 1.9E-15 | 59%            |
| PC aa C40:1 with fish                                        | 0.053                            | 0.026    | 0.081    | 1.5E-04 | 0%             |
| PC aa C40:4 with fish                                        | -0.057                           | -0.084   | -0.030   | 3.4E-05 | 21%            |
| PC aa C40:6 with fish                                        | 0.099                            | 0.071    | 0.127    | 2.5E-12 | 51%            |
| PC aa C42:2 with fish                                        | 0.057                            | 0.030    | 0.084    | 4.6E-05 | 13%            |
| PC ae C38:0 with fish                                        | 0.084                            | 0.057    | 0.112    | 1.5E-09 | 40%            |
| PC ae C38:6 with fish                                        | 0.074                            | 0.046    | 0.102    | 2.3E-07 | 57%            |
| PC ae C40:6 with fish                                        | 0.086                            | 0.058    | 0.113    | 1.4E-09 | 34%            |
| PC aa C28:1 with dairy                                       | 0.015                            | 0.010    | 0.021    | 2.6E-08 | 59%            |
| PC aa C30:0 with dairy                                       | 0.012                            | 0.007    | 0.017    | 1.2E-05 | 70%            |
| PC aa C38:0 with dairy                                       | -0.013                           | -0.018   | -0.007   | 2.9E-06 | 0%             |
| PC ae C30:0 with dairy                                       | 0.015                            | 0.010    | 0.020    | 2.2E-08 | 74%            |
| PC ae C38:6 with dairy                                       | -0.010                           | -0.016   | -0.005   | 2.7E-04 | 0%             |
| SM (OH) C14:1 with dairy                                     | 0.013                            | 0.007    | 0.018    | 2.7E-06 | 71%            |
| PC ae C30:0 with potatoes                                    | -0.042                           | -0.064   | -0.020   | 1.7E-04 | 0%             |
| PC ae C34:0 with potatoes                                    | -0.049                           | -0.071   | -0.027   | 1.2E-05 | 29%            |
| SM (OH) C14:1 with potatoes                                  | -0.049                           | -0.070   | -0.027   | 1.2E-05 | 52%            |
| Ac-Orn with fruits                                           | 0.016                            | 0.008    | 0.024    | 5.7E-05 | 0%             |
| PC aa C38:0 with sweets                                      | -0.021                           | -0.031   | -0.011   | 2.2E-05 | 0%             |
| PC aa C38:6 with sweets                                      | -0.020                           | -0.030   | -0.010   | 8.6E-05 | 0%             |
| PC ae C38:5 with sweets                                      | -0.020                           | -0.030   | -0.011   | 4.5E-05 | 0%             |
| PC ae C38:6 with sweets                                      | -0.020                           | -0.030   | -0.010   | 1.2E-04 | 0%             |
| PC ae C40:6 with sweets                                      | -0.022                           | -0.032   | -0.012   | 1.4E-05 | 0%             |
| lysoPC a C17:0 with bakery products                          | -0.026                           | -0.039   | -0.013   | 5.7E-05 | 56%            |
| PC aa C36:6 with bakery products                             | -0.028                           | -0.041   | -0.015   | 2.7E-05 | 0%             |
| PC aa C38:0 with bakery products                             | -0.027                           | -0.040   | -0.014   | 3.3E-05 | 52%            |
| PC aa C38:6 with bakery products                             | -0.028                           | -0.041   | -0.014   | 3.5E-05 | 52%            |
| PC aa C40:6 with bakery products                             | -0.027                           | -0.040   | -0.015   | 2.9E-05 | 41%            |
| PC ae C38:0 with bakery products                             | -0.030                           | -0.043   | -0.017   | 3.9E-06 | 15%            |
| PC ae C38:6 with bakery products                             | -0.025                           | -0.038   | -0.012   | 1.3E-04 | 14%            |
| PC ae C40:2 with bakery products                             | -0.027                           | -0.040   | -0.014   | 4.3E-05 | 53%            |
| PC ae C40:6 with bakery products                             | -0.026                           | -0.039   | -0.013   | 6.6E-05 | 36%            |
| SM (OH) C14:1 with bakery products                           | -0.027                           | -0.040   | -0.015   | 2.4E-05 | 27%            |
| SM (OH) C16:1 with bakery products                           | -0.031                           | -0.043   | -0.018   | 9.7E-07 | 43%            |
| C5:1 with beverages                                          | -0.032                           | -0.050   | -0.015   | 2.7E-04 | 0%             |
| C6:1 with beverages                                          | -0.030                           | -0.046   | -0.014   | 2.6E-04 | 15%            |
| SM (OH) C16:1 with beverages                                 | -0.032                           | -0.050   | -0.015   | 2.3E-04 | 0%             |

**Supplementary Table 10 Variance decomposition analysis of urine metabolites (% variance explained)**

|                                           | analytical | pre-analytical | demographic | dietary | cohort | residual |
|-------------------------------------------|------------|----------------|-------------|---------|--------|----------|
| creatinine                                | 2.5        | 1.1            | 7.0         | 1.8     | 2.0    | 85.7     |
| leucine                                   | 1.5        | 0.4            | 1.4         | 3.1     | 2.3    | 91.4     |
| isoleucine                                | 1.3        | 0.0            | 0.5         | 0.6     | 0.5    | 97.1     |
| valine                                    | 1.5        | 0.6            | 2.7         | 3.1     | 1.7    | 90.4     |
| 3-hydroxyisobutyrate                      | 0.8        | 1.3            | 2.2         | 1.3     | 1.0    | 93.5     |
| 4-deoxyerythronic acid                    | 1.4        | 0.8            | 9.0         | 2.5     | 3.0    | 83.4     |
| 4-deoxythreonic acid                      | 1.5        | 1.5            | 3.8         | 1.1     | 1.4    | 90.7     |
| threonine/ lactate                        | 1.9        | 1.0            | 0.6         | 1.5     | 0.9    | 94.1     |
| 2-hydroxyisobutyrate                      | 2.0        | 1.6            | 1.0         | 2.9     | 1.2    | 91.3     |
| alanine                                   | 1.2        | 1.5            | 0.6         | 2.3     | 1.4    | 93.1     |
| lysine                                    | 1.1        | 0.0            | 0.7         | 1.7     | 1.0    | 95.5     |
| acetate                                   | 3.1        | 0.7            | 1.4         | 2.5     | 1.0    | 91.2     |
| <i>p</i> -cresol sulfate                  | 1.9        | 0.2            | 0.9         | 1.3     | 1.5    | 94.2     |
| succinate                                 | 1.8        | 0.3            | 2.5         | 1.1     | 1.0    | 93.3     |
| glutamine                                 | 2.2        | 0.3            | 0.4         | 1.1     | 0.2    | 95.9     |
| citrate                                   | 1.9        | 2.4            | 2.8         | 1.6     | 3.9    | 87.5     |
| dimethylamine                             | 1.1        | 1.4            | 0.5         | 1.6     | 0.8    | 94.7     |
| trimethylamine                            | 1.2        | 0.2            | 1.1         | 0.9     | 0.9    | 95.7     |
| carnitine/ choline                        | 1.3        | 0.5            | 2.9         | 2.2     | 1.0    | 92.2     |
| trimethylamine <i>N</i> -oxide            | 1.3        | 1.0            | 1.0         | 1.1     | 0.5    | 95.1     |
| <i>scyllo</i> -inositol                   | 15.8       | 0.1            | 0.8         | 1.5     | 1.4    | 80.4     |
| taurine                                   | 3.7        | 0.4            | 1.9         | 3.1     | 1.4    | 89.6     |
| glycine                                   | 1.7        | 1.2            | 0.5         | 1.6     | 4.1    | 90.8     |
| creatine                                  | 1.5        | 1.2            | 1.1         | 2.6     | 3.0    | 90.6     |
| hippurate                                 | 1.6        | 1.6            | 3.5         | 7.8     | 7.4    | 78.0     |
| formate                                   | 1.0        | 0.2            | 3.6         | 1.0     | 0.8    | 93.5     |
| pantothenate                              | 1.0        | 0.2            | 6.7         | 2.8     | 0.7    | 88.7     |
| 3-hydroxybutyrate/ 3-aminoisobutyrate     | 1.5        | 1.6            | 0.2         | 3.7     | 2.1    | 90.9     |
| 3-hydroxyisovalerate                      | 1.1        | 1.3            | 2.8         | 1.8     | 1.1    | 91.9     |
| <i>N</i> -acetyl-neuraminic acid          | 2.6        | 2.4            | 0.7         | 2.3     | 1.1    | 90.8     |
| acetone                                   | 3.2        | 1.1            | 3.3         | 1.2     | 4.0    | 87.2     |
| 5-oxoproline                              | 1.3        | 0.4            | 1.2         | 1.4     | 1.3    | 94.4     |
| 3-aminoisobutyrate                        | 2.1        | 0.2            | 0.6         | 2.7     | 1.4    | 93.0     |
| proline betaine                           | 0.5        | 0.5            | 0.3         | 2.7     | 1.7    | 94.3     |
| glucose                                   | 1.0        | 1.1            | 0.7         | 1.1     | 0.6    | 95.6     |
| sucrose                                   | 2.2        | 0.4            | 2.5         | 2.3     | 5.5    | 87.1     |
| urea                                      | 2.1        | 0.3            | 1.8         | 2.9     | 1.4    | 91.4     |
| <i>N</i> -methyl-2-pyridone-5-carboxamide | 1.9        | 0.2            | 1.0         | 0.9     | 1.8    | 94.1     |
| <i>p</i> -hydroxyphenylacetate            | 1.5        | 1.8            | 0.5         | 1.7     | 4.2    | 90.4     |
| tyrosine                                  | 2.1        | 0.6            | 5.0         | 0.6     | 2.0    | 89.8     |
| 3-Indoxylsulfate                          | 1.2        | 0.3            | 1.3         | 0.8     | 0.2    | 96.2     |
| <i>N</i> -methylpicolinic acid            | 1.3        | 0.1            | 0.3         | 0.7     | 1.6    | 96.0     |
| <i>N</i> -methylnicotinic acid            | 0.4        | 1.2            | 1.5         | 4.1     | 0.1    | 92.7     |
| <i>N</i> -methyl nicotinamide             | 1.4        | 5.5            | 1.3         | 1.2     | 1.1    | 89.6     |

**Supplementary Table 11 Variance decomposition analysis of serum metabolites (% variance explained)**

|                 | analytical | pre-analytical | demographic | dietary | cohort | residual |
|-----------------|------------|----------------|-------------|---------|--------|----------|
| C0              | 3.6        | 0.7            | 6.9         | 0.4     | 0.3    | 88.0     |
| C10             | 3.3        | 1.0            | 5.8         | 2.0     | 2.6    | 85.3     |
| C10:1           | 3.2        | 1.2            | 7.4         | 2.5     | 5.7    | 80.0     |
| C10:2           | 6.2        | 0.0            | 4.6         | 2.8     | 6.5    | 80.0     |
| C12             | 3.7        | 1.2            | 8.1         | 1.8     | 3.0    | 82.3     |
| C12-DC          | 35.8       | 0.0            | 0.3         | 0.6     | 0.1    | 63.2     |
| C12:1           | 5.0        | 1.3            | 6.4         | 1.7     | 2.3    | 83.2     |
| C14             | 42.6       | 0.4            | 2.6         | 0.9     | 1.4    | 52.0     |
| C14:1           | 2.2        | 2.6            | 7.0         | 1.4     | 1.3    | 85.5     |
| C14:1-OH        | 6.7        | 0.6            | 4.1         | 1.2     | 1.7    | 85.7     |
| C14:2           | 2.6        | 2.0            | 6.2         | 2.3     | 3.5    | 83.3     |
| C14:2-OH        | 57.3       | 0.0            | 0.4         | 0.5     | 0.5    | 41.3     |
| C16             | 5.2        | 1.6            | 7.0         | 2.2     | 3.9    | 80.0     |
| C16-OH          | 83.0       | 0.0            | 0.1         | 0.2     | 0.0    | 16.7     |
| C16:1           | 3.0        | 2.8            | 4.9         | 1.3     | 0.8    | 87.2     |
| C16:1-OH        | 17.8       | 0.7            | 3.1         | 1.1     | 1.3    | 75.9     |
| C16:2           | 28.3       | 0.9            | 2.8         | 0.8     | 0.4    | 66.7     |
| C16:2-OH        | 22.6       | 0.2            | 3.2         | 0.9     | 1.1    | 72.0     |
| C18             | 6.1        | 0.4            | 5.2         | 2.3     | 0.6    | 85.3     |
| C18:1           | 4.2        | 4.8            | 6.4         | 2.3     | 3.0    | 79.3     |
| C18:2           | 4.3        | 2.1            | 9.5         | 3.3     | 6.9    | 73.8     |
| C2              | 1.1        | 3.4            | 5.2         | 1.3     | 2.4    | 86.5     |
| C3              | 16.7       | 1.4            | 4.7         | 0.8     | 2.3    | 74.1     |
| C3-DC (C4-OH)   | 16.6       | 0.5            | 3.8         | 2.3     | 1.1    | 75.7     |
| C3-OH           | 68.0       | 0.0            | 0.1         | 0.4     | 0.2    | 31.4     |
| C4              | 14.7       | 0.5            | 1.3         | 1.6     | 1.6    | 80.4     |
| C4:1            | 64.0       | 0.0            | 0.2         | 0.6     | 0.3    | 34.8     |
| C6 (C4:1-DC)    | 7.4        | 1.1            | 4.6         | 1.7     | 2.5    | 82.8     |
| C5              | 2.6        | 1.3            | 4.4         | 2.5     | 1.1    | 88.1     |
| C5-M-DC         | 55.4       | 0.1            | 0.9         | 0.7     | 0.3    | 42.7     |
| C5-OH (C3-DC-M) | 17.4       | 0.6            | 1.6         | 1.7     | 0.4    | 78.4     |
| C5:1            | 10.6       | 0.1            | 0.7         | 3.2     | 0.7    | 84.7     |
| C5:1-DC         | 59.3       | 0.3            | 0.2         | 0.7     | 0.2    | 39.3     |
| C5-DC (C6-OH)   | 34.6       | 0.3            | 1.5         | 1.3     | 0.4    | 61.9     |
| C6:1            | 24.0       | 0.1            | 3.1         | 3.8     | 1.8    | 67.2     |
| C7-DC           | 39.3       | 0.6            | 2.4         | 0.6     | 0.6    | 56.6     |
| C8              | 9.8        | 1.0            | 4.6         | 1.6     | 2.1    | 81.0     |
| C9              | 14.5       | 0.0            | 2.6         | 6.4     | 7.0    | 69.5     |
| Ala             | 3.9        | 2.0            | 2.6         | 2.1     | 2.3    | 87.1     |
| Arg             | 4.8        | 0.5            | 0.8         | 1.9     | 4.4    | 87.7     |
| Asn             | 4.7        | 0.8            | 1.3         | 2.4     | 4.6    | 86.2     |
| Asp             | 5.6        | 4.3            | 13.5        | 4.3     | 11.3   | 61.1     |
| Cit             | 6.5        | 0.0            | 3.8         | 1.6     | 4.3    | 83.8     |
| Gln             | 5.4        | 0.0            | 3.2         | 2.5     | 7.6    | 81.2     |
| Glu             | 2.1        | 0.5            | 23.8        | 2.8     | 5.4    | 65.5     |
| Gly             | 6.2        | 0.3            | 2.5         | 2.4     | 4.8    | 83.8     |
| His             | 9.2        | 0.9            | 0.5         | 1.7     | 1.0    | 86.7     |
| Ile             | 1.9        | 0.3            | 3.8         | 4.0     | 5.6    | 84.4     |
| Leu             | 2.1        | 0.3            | 3.5         | 4.3     | 4.3    | 85.4     |
| Lys             | 6.0        | 1.1            | 5.4         | 1.6     | 1.9    | 84.0     |
| Met             | 11.5       | 0.8            | 0.9         | 1.5     | 1.6    | 83.7     |
| Orn             | 4.9        | 0.4            | 4.7         | 2.5     | 4.8    | 82.7     |
| Phe             | 4.7        | 1.0            | 2.9         | 4.5     | 4.2    | 82.6     |
| Pro             | 2.9        | 1.5            | 1.9         | 0.6     | 2.1    | 91.1     |
| Ser             | 7.0        | 0.6            | 5.4         | 0.9     | 2.9    | 83.2     |
| Thr             | 4.4        | 0.7            | 5.3         | 1.5     | 3.5    | 84.7     |
| Trp             | 9.4        | 0.9            | 3.0         | 2.7     | 3.2    | 80.9     |
| Tyr             | 2.4        | 0.4            | 2.5         | 2.4     | 3.4    | 88.8     |
| Val             | 3.3        | 0.3            | 5.1         | 4.0     | 4.2    | 83.2     |
| Ac-Orn          | 3.6        | 0.1            | 2.0         | 7.4     | 12.6   | 74.3     |
| ADMA            | 7.2        | 0.3            | 5.3         | 1.1     | 3.2    | 82.9     |
| alpha-AAA       | 12.2       | 0.4            | 3.6         | 3.3     | 3.5    | 77.1     |
| Creatinine      | 3.8        | 0.6            | 14.1        | 2.0     | 1.7    | 77.7     |
| Kynurenine      | 4.6        | 0.6            | 1.5         | 1.2     | 1.4    | 90.7     |
| Met-SO          | 6.9        | 0.3            | 17.3        | 2.7     | 4.2    | 68.6     |
| Putrescine      | 14.1       | 0.5            | 1.9         | 1.0     | 1.1    | 81.5     |
| SDMA            | 59.7       | 0.1            | 1.3         | 0.4     | 0.5    | 37.9     |
| Serotonin       | 2.6        | 1.3            | 4.9         | 1.5     | 5.2    | 84.5     |
| Spermidine      | 29.6       | 2.4            | 0.9         | 1.0     | 1.7    | 64.4     |
| Spermine        | 51.2       | 0.3            | 0.3         | 0.3     | 0.8    | 47.0     |
| t4-OH-Pro       | 5.6        | 0.1            | 1.9         | 2.6     | 0.4    | 89.4     |
| Taurine         | 2.5        | 3.4            | 8.9         | 4.4     | 13.9   | 66.9     |
| total DMA       | 32.5       | 0.1            | 4.7         | 0.9     | 3.9    | 58.0     |
| lysoPC a C14:0  | 17.5       | 0.8            | 1.6         | 3.4     | 2.5    | 74.2     |
| lysoPC a C16:0  | 13.2       | 0.3            | 1.0         | 2.9     | 3.8    | 78.7     |
| lysoPC a C16:1  | 8.3        | 0.5            | 2.8         | 2.3     | 4.4    | 81.7     |

|                |      |     |     |      |      |      |
|----------------|------|-----|-----|------|------|------|
| lysoPC a C17:0 | 9.5  | 1.6 | 3.1 | 5.6  | 5.0  | 75.1 |
| lysoPC a C18:0 | 12.6 | 0.2 | 0.3 | 2.0  | 2.3  | 82.6 |
| lysoPC a C18:1 | 8.3  | 0.3 | 3.4 | 5.2  | 9.1  | 73.8 |
| lysoPC a C18:2 | 6.0  | 0.6 | 3.1 | 3.5  | 6.5  | 80.2 |
| lysoPC a C20:3 | 5.2  | 0.1 | 3.0 | 9.6  | 8.8  | 73.4 |
| lysoPC a C20:4 | 8.0  | 0.0 | 2.5 | 6.0  | 7.6  | 75.9 |
| lysoPC a C24:0 | 19.8 | 0.1 | 0.9 | 0.8  | 1.7  | 76.8 |
| lysoPC a C26:0 | 20.5 | 0.1 | 0.2 | 1.1  | 0.3  | 77.9 |
| lysoPC a C26:1 | 25.5 | 0.0 | 0.3 | 0.6  | 0.4  | 73.1 |
| lysoPC a C28:0 | 18.6 | 0.1 | 0.2 | 1.2  | 0.3  | 79.6 |
| lysoPC a C28:1 | 20.4 | 0.2 | 0.7 | 1.1  | 1.3  | 76.4 |
| PC aa C24:0    | 17.7 | 0.0 | 0.4 | 0.6  | 0.1  | 81.2 |
| PC aa C28:1    | 7.8  | 0.4 | 3.5 | 6.9  | 4.1  | 77.3 |
| PC aa C30:0    | 5.4  | 0.2 | 1.1 | 4.8  | 5.1  | 83.4 |
| PC aa C30:2    | 26.5 | 0.2 | 0.2 | 0.6  | 0.0  | 72.4 |
| PC aa C32:0    | 17.9 | 0.1 | 1.8 | 1.1  | 4.6  | 74.6 |
| PC aa C32:1    | 6.3  | 0.1 | 2.0 | 3.4  | 7.1  | 81.1 |
| PC aa C32:2    | 6.5  | 0.2 | 2.1 | 2.0  | 1.1  | 88.0 |
| PC aa C32:3    | 17.6 | 0.2 | 2.9 | 4.9  | 4.7  | 69.6 |
| PC aa C34:1    | 12.9 | 0.1 | 1.0 | 2.6  | 6.0  | 77.3 |
| PC aa C34:2    | 15.4 | 0.1 | 2.3 | 2.8  | 4.6  | 74.9 |
| PC aa C34:3    | 8.4  | 0.4 | 2.7 | 5.1  | 7.5  | 75.9 |
| PC aa C34:4    | 6.1  | 0.2 | 6.2 | 1.7  | 0.6  | 85.3 |
| PC aa C36:0    | 7.7  | 0.3 | 5.3 | 9.1  | 3.9  | 73.7 |
| PC aa C36:1    | 8.3  | 0.3 | 1.3 | 1.8  | 4.7  | 83.5 |
| PC aa C36:2    | 13.3 | 0.1 | 0.4 | 1.5  | 2.1  | 82.6 |
| PC aa C36:3    | 13.0 | 0.2 | 1.1 | 4.6  | 3.2  | 77.9 |
| PC aa C36:4    | 11.3 | 0.0 | 2.2 | 3.0  | 4.9  | 78.5 |
| PC aa C36:5    | 3.3  | 0.3 | 3.1 | 18.8 | 19.8 | 54.6 |
| PC aa C36:6    | 4.5  | 0.3 | 8.3 | 15.4 | 12.3 | 59.3 |
| PC aa C38:0    | 5.9  | 0.5 | 7.2 | 14.7 | 5.6  | 66.0 |
| PC aa C38:1    | 4.7  | 0.4 | 3.7 | 8.8  | 6.7  | 75.7 |
| PC aa C38:3    | 8.0  | 0.3 | 8.6 | 3.5  | 1.7  | 77.8 |
| PC aa C38:4    | 8.1  | 0.0 | 5.2 | 2.5  | 3.5  | 80.6 |
| PC aa C38:5    | 7.4  | 0.2 | 1.2 | 6.7  | 6.4  | 78.0 |
| PC aa C38:6    | 4.3  | 0.6 | 6.7 | 15.5 | 9.6  | 63.3 |
| PC aa C40:1    | 9.2  | 0.9 | 2.2 | 8.9  | 4.5  | 74.3 |
| PC aa C40:2    | 8.7  | 0.4 | 1.7 | 4.1  | 1.8  | 83.3 |
| PC aa C40:3    | 15.2 | 0.5 | 1.6 | 5.4  | 3.9  | 73.5 |
| PC aa C40:4    | 6.1  | 0.1 | 3.6 | 4.0  | 1.7  | 84.4 |
| PC aa C40:5    | 5.2  | 0.0 | 1.6 | 3.9  | 5.2  | 84.0 |
| PC aa C40:6    | 2.9  | 0.5 | 9.7 | 14.9 | 11.7 | 60.4 |
| PC aa C42:0    | 5.2  | 0.5 | 3.2 | 7.0  | 4.2  | 80.1 |
| PC aa C42:1    | 6.5  | 0.6 | 2.1 | 6.4  | 2.6  | 81.8 |
| PC aa C42:2    | 8.4  | 0.4 | 2.9 | 6.2  | 2.5  | 79.7 |
| PC aa C42:4    | 10.5 | 0.1 | 0.8 | 0.8  | 0.3  | 87.6 |
| PC aa C42:5    | 8.0  | 0.2 | 3.1 | 11.8 | 15.0 | 62.0 |
| PC aa C42:6    | 6.2  | 0.6 | 3.4 | 14.9 | 18.6 | 56.3 |
| PC ae C30:0    | 9.8  | 0.9 | 3.3 | 6.1  | 8.3  | 71.7 |
| PC ae C30:1    | 26.4 | 0.2 | 0.9 | 0.6  | 0.5  | 71.4 |
| PC ae C30:2    | 18.0 | 0.5 | 2.7 | 1.3  | 1.6  | 75.9 |
| PC ae C32:1    | 19.4 | 0.0 | 3.2 | 0.8  | 2.7  | 73.9 |
| PC ae C32:2    | 23.2 | 0.2 | 5.9 | 2.3  | 1.9  | 66.4 |
| PC ae C34:0    | 9.6  | 0.2 | 3.9 | 6.1  | 6.8  | 73.4 |
| PC ae C34:1    | 17.4 | 0.1 | 3.2 | 1.4  | 3.8  | 74.2 |
| PC ae C34:2    | 12.4 | 0.1 | 2.7 | 1.9  | 4.6  | 78.3 |
| PC ae C34:3    | 12.9 | 0.1 | 0.7 | 1.6  | 2.2  | 82.5 |
| PC ae C36:0    | 18.4 | 0.7 | 3.4 | 3.2  | 4.7  | 69.7 |
| PC ae C36:1    | 11.5 | 0.2 | 1.7 | 5.8  | 6.6  | 74.2 |
| PC ae C36:2    | 11.7 | 0.8 | 2.5 | 3.8  | 2.4  | 78.9 |
| PC ae C36:3    | 13.0 | 0.0 | 3.9 | 2.7  | 2.4  | 77.9 |
| PC ae C36:4    | 8.4  | 0.0 | 7.9 | 5.9  | 8.3  | 69.5 |
| PC ae C36:5    | 8.8  | 0.0 | 4.1 | 3.1  | 4.1  | 79.9 |
| PC ae C38:0    | 6.4  | 0.5 | 5.3 | 18.4 | 13.4 | 55.9 |
| PC ae C38:1    | 7.7  | 0.2 | 1.5 | 1.8  | 2.7  | 86.1 |
| PC ae C38:2    | 10.5 | 0.3 | 2.0 | 2.1  | 0.3  | 84.8 |
| PC ae C38:3    | 9.6  | 0.4 | 0.9 | 2.6  | 1.1  | 85.5 |
| PC ae C38:4    | 9.9  | 0.2 | 5.9 | 2.2  | 3.3  | 78.5 |
| PC ae C38:5    | 9.6  | 0.0 | 6.8 | 4.7  | 4.1  | 74.8 |
| PC ae C38:6    | 6.3  | 0.3 | 7.5 | 8.9  | 3.8  | 73.2 |
| PC ae C40:1    | 10.8 | 0.2 | 3.8 | 6.1  | 1.9  | 77.1 |
| PC ae C40:2    | 5.2  | 0.4 | 1.9 | 13.4 | 15.2 | 63.9 |
| PC ae C40:3    | 9.1  | 0.3 | 0.9 | 1.5  | 1.4  | 86.8 |
| PC ae C40:4    | 10.4 | 0.1 | 2.8 | 1.2  | 1.3  | 84.1 |
| PC ae C40:5    | 8.2  | 0.3 | 3.1 | 1.3  | 0.5  | 86.7 |
| PC ae C40:6    | 4.9  | 0.8 | 7.0 | 12.9 | 10.0 | 64.4 |
| PC ae C42:0    | 14.6 | 0.8 | 1.5 | 10.5 | 7.3  | 65.3 |
| PC ae C42:1    | 14.7 | 0.2 | 1.1 | 1.8  | 1.1  | 81.2 |
| PC ae C42:2    | 8.2  | 0.6 | 1.9 | 6.5  | 7.5  | 75.3 |
| PC ae C42:3    | 10.3 | 1.1 | 2.8 | 4.6  | 3.2  | 77.8 |
| PC ae C42:4    | 8.5  | 0.2 | 3.0 | 0.7  | 0.3  | 87.4 |



|               |      |     |     |     |     |      |
|---------------|------|-----|-----|-----|-----|------|
| PC ae C42:5   | 7.1  | 0.5 | 3.2 | 0.7 | 0.1 | 88.4 |
| PC ae C44:3   | 15.1 | 0.3 | 1.5 | 0.7 | 2.1 | 80.3 |
| PC ae C44:4   | 7.5  | 0.4 | 2.3 | 1.1 | 1.0 | 87.6 |
| PC ae C44:5   | 5.8  | 0.2 | 3.6 | 0.5 | 0.2 | 89.7 |
| PC ae C44:6   | 6.0  | 0.2 | 1.6 | 2.0 | 3.0 | 87.1 |
| SM (OH) C14:1 | 10.6 | 0.8 | 4.2 | 7.1 | 7.6 | 69.7 |
| SM (OH) C16:1 | 13.6 | 0.8 | 6.0 | 6.8 | 8.1 | 64.6 |
| SM (OH) C22:1 | 38.0 | 0.1 | 1.9 | 1.6 | 4.6 | 53.9 |
| SM (OH) C22:2 | 39.2 | 0.2 | 1.0 | 2.7 | 3.9 | 52.9 |
| SM (OH) C24:1 | 33.1 | 0.2 | 0.7 | 1.2 | 2.9 | 61.8 |
| SM C16:0      | 22.0 | 0.2 | 1.3 | 0.7 | 1.1 | 74.7 |
| SM C16:1      | 18.9 | 0.0 | 8.7 | 1.0 | 1.5 | 69.9 |
| SM C18:0      | 22.3 | 0.1 | 3.5 | 0.7 | 1.7 | 71.8 |
| SM C18:1      | 20.2 | 0.1 | 9.5 | 0.9 | 1.3 | 68.0 |
| SM C20:2      | 21.6 | 0.0 | 1.7 | 0.8 | 2.0 | 73.9 |
| SM C24:0      | 44.6 | 0.5 | 1.4 | 0.9 | 0.6 | 52.1 |
| SM C24:1      | 42.5 | 0.2 | 0.5 | 2.1 | 2.5 | 52.2 |
| SM C26:0      | 22.1 | 0.6 | 1.6 | 2.0 | 2.8 | 70.9 |
| SM C26:1      | 20.5 | 0.6 | 1.1 | 5.2 | 5.4 | 67.2 |
| H1            | 4.9  | 0.5 | 4.3 | 0.6 | 2.9 | 86.9 |

### Supplementary Table 12 Modeled results with Box-Cox transformation and QRILC imputation - metabolites associated with age

| metabolite         | effect size (SD/ year) | lower CI | upper CI | p-value | I <sup>2</sup> |
|--------------------|------------------------|----------|----------|---------|----------------|
| creatinine (urine) | 0.39                   | 0.26     | 0.53     | 4.7E-09 | 0%             |
| Creatinine (serum) | 0.30                   | 0.17     | 0.43     | 4.0E-06 | 19%            |

### Supplementary Table 13 Modeled results with Box-Cox transformation and QRILC imputation - metabolites associated with sex

| metabolite           | effect size | lower CI | upper CI | p-value | I <sup>2</sup> |
|----------------------|-------------|----------|----------|---------|----------------|
| isoleucine (urine)   | -0.28       | -0.41    | -0.16    | 6.2E-06 | 67%            |
| glutamine (urine)    | 0.21        | 0.09     | 0.34     | 6.9E-04 | 0%             |
| citrate (urine)      | -0.21       | -0.33    | -0.09    | 4.8E-04 | 21%            |
| 5-oxoproline (urine) | 0.23        | 0.10     | 0.36     | 3.7E-04 | 0%             |
| tyrosine (urine)     | 0.44        | 0.32     | 0.56     | 3.8E-13 | 0%             |
| C10                  | -0.23       | -0.35    | -0.11    | 2.6E-04 | 26%            |
| C12                  | -0.29       | -0.42    | -0.17    | 1.7E-06 | 18%            |
| C14:1                | -0.34       | -0.46    | -0.21    | 7.0E-08 | 12%            |
| C14:1-OH             | -0.23       | -0.35    | -0.11    | 2.1E-04 | 15%            |
| C14:2                | -0.24       | -0.36    | -0.12    | 9.2E-05 | 13%            |
| C16:1                | -0.26       | -0.38    | -0.14    | 2.4E-05 | 0%             |
| Lys                  | -0.24       | -0.36    | -0.12    | 9.4E-05 | 53%            |
| Orn                  | -0.35       | -0.47    | -0.23    | 2.1E-08 | 20%            |
| Ser                  | -0.26       | -0.39    | -0.14    | 2.2E-05 | 8%             |
| Putrescine           | -0.27       | -0.38    | -0.15    | 6.4E-06 | 39%            |
| Serotonin            | 0.32        | 0.20     | 0.44     | 1.6E-07 | 54%            |
| SM C16:1             | -0.35       | -0.46    | -0.24    | 3.2E-10 | 0%             |
| SM C18:0             | -0.22       | -0.33    | -0.11    | 9.6E-05 | 0%             |
| SM C18:1             | -0.36       | -0.46    | -0.25    | 1.4E-10 | 0%             |
| H1                   | 0.23        | 0.11     | 0.35     | 2.4E-04 | 7%             |

Metabolites found higher in male children are shown as positive and metabolites found higher in female children are shown as negative

**Supplementary Table 14 Modeled results with Box-Cox transformation and QRILC imputation  
- metabolites associated with BMI z-score**

| metabolite                     | effect size (SD/ unit z-score) | lower CI | upper CI | p-value | I <sup>2</sup> |
|--------------------------------|--------------------------------|----------|----------|---------|----------------|
| valine (urine)                 | 0.10                           | 0.05     | 0.15     | 2.0E-04 | 0%             |
| 4-deoxyerythronic acid (urine) | 0.21                           | 0.16     | 0.26     | 5.7E-16 | 30%            |
| p-cresol sulfate (urine)       | -0.11                          | -0.16    | -0.06    | 3.9E-05 | 57%            |
| pantothenate (urine)           | -0.12                          | -0.17    | -0.07    | 2.2E-06 | 11%            |
| C0                             | 0.19                           | 0.14     | 0.24     | 3.2E-13 | 0%             |
| C18                            | -0.13                          | -0.18    | -0.08    | 8.1E-07 | 21%            |
| C3                             | 0.15                           | 0.10     | 0.20     | 7.4E-10 | 0%             |
| C5                             | 0.13                           | 0.08     | 0.19     | 4.0E-07 | 0%             |
| Asp                            | 0.10                           | 0.05     | 0.15     | 1.2E-04 | 13%            |
| Glu                            | 0.22                           | 0.17     | 0.27     | 3.7E-17 | 0%             |
| Ile                            | 0.11                           | 0.05     | 0.16     | 7.5E-05 | 0%             |
| Leu                            | 0.12                           | 0.07     | 0.17     | 4.9E-06 | 0%             |
| Lys                            | 0.10                           | 0.05     | 0.15     | 1.3E-04 | 0%             |
| Phe                            | 0.13                           | 0.07     | 0.18     | 1.4E-06 | 12%            |
| Pro                            | 0.10                           | 0.05     | 0.15     | 1.3E-04 | 0%             |
| Tyr                            | 0.10                           | 0.05     | 0.15     | 2.7E-04 | 0%             |
| Val                            | 0.13                           | 0.08     | 0.19     | 4.1E-07 | 0%             |
| ADMA                           | 0.10                           | 0.04     | 0.15     | 2.5E-04 | 0%             |
| alpha-AAA                      | 0.10                           | 0.05     | 0.15     | 8.7E-05 | 0%             |
| Kynurenine                     | 0.10                           | 0.05     | 0.15     | 1.1E-04 | 37%            |
| lysoPC a C16:1                 | 0.14                           | 0.09     | 0.19     | 9.5E-08 | 0%             |
| lysoPC a C18:1                 | -0.09                          | -0.14    | -0.04    | 1.9E-04 | 0%             |
| lysoPC a C18:2                 | -0.12                          | -0.17    | -0.07    | 4.9E-06 | 0%             |
| PC aa C32:1                    | 0.11                           | 0.06     | 0.16     | 1.7E-05 | 0%             |
| PC aa C32:3                    | 0.10                           | 0.05     | 0.15     | 5.2E-05 | 0%             |
| PC aa C34:4                    | 0.13                           | 0.08     | 0.19     | 2.4E-07 | 0%             |
| PC aa C36:5                    | 0.10                           | 0.05     | 0.15     | 1.4E-04 | 0%             |
| PC aa C36:6                    | 0.10                           | 0.04     | 0.15     | 2.6E-04 | 0%             |
| PC aa C38:1                    | -0.10                          | -0.15    | -0.05    | 1.4E-04 | 32%            |
| PC aa C38:3                    | 0.20                           | 0.15     | 0.25     | 5.7E-16 | 0%             |
| PC aa C38:4                    | 0.13                           | 0.08     | 0.19     | 1.5E-07 | 0%             |
| PC aa C40:6                    | 0.10                           | 0.05     | 0.15     | 1.2E-04 | 0%             |
| PC ae C34:0                    | -0.09                          | -0.14    | -0.04    | 1.9E-04 | 0%             |
| PC ae C34:1                    | -0.09                          | -0.14    | -0.04    | 2.6E-04 | 0%             |
| PC ae C36:0                    | -0.10                          | -0.15    | -0.05    | 2.3E-05 | 0%             |
| PC ae C36:2                    | -0.12                          | -0.17    | -0.07    | 2.0E-06 | 0%             |
| PC ae C38:2                    | -0.10                          | -0.15    | -0.05    | 5.2E-05 | 0%             |
| PC ae C40:4                    | -0.11                          | -0.16    | -0.06    | 2.1E-05 | 21%            |
| PC ae C40:5                    | -0.10                          | -0.15    | -0.05    | 1.0E-04 | 12%            |
| PC ae C40:6                    | -0.10                          | -0.15    | -0.05    | 1.5E-04 | 0%             |
| PC ae C42:3                    | -0.11                          | -0.16    | -0.06    | 1.6E-05 | 0%             |
| PC ae C42:4                    | -0.14                          | -0.19    | -0.09    | 1.6E-07 | 0%             |
| PC ae C44:4                    | -0.11                          | -0.16    | -0.05    | 6.7E-05 | 23%            |
| SM C16:0                       | -0.10                          | -0.14    | -0.05    | 7.3E-05 | 17%            |
| SM C16:1                       | 0.16                           | 0.12     | 0.21     | 1.3E-11 | 0%             |
| SM C18:1                       | 0.15                           | 0.11     | 0.20     | 8.9E-11 | 0%             |

**Supplementary Table 15 Modeled results with Box-Cox transformation and QRILC imputation  
- metabolites associated with dietary intake**

| metabolite-diet pair                                         | effect size (SD/ times per week) | lower CI | upper CI | p-value | I <sup>2</sup> |
|--------------------------------------------------------------|----------------------------------|----------|----------|---------|----------------|
| creatine (urine) with meat                                   | 0.027                            | 0.013    | 0.040    | 1.3E-04 | 0%             |
| pantothenate (urine) with dairy                              | 0.009                            | 0.004    | 0.015    | 7.5E-04 | 37%            |
| hippurate (urine) with vegetables                            | 0.021                            | 0.011    | 0.031    | 2.6E-05 | 0%             |
| leucine (urine) with fruits                                  | -0.014                           | -0.022   | -0.006   | 6.0E-04 | 0%             |
| threonine/ lactate (urine) with fruits                       | -0.013                           | -0.021   | -0.005   | 9.6E-04 | 19%            |
| alanine (urine) with fruits                                  | -0.014                           | -0.022   | -0.006   | 7.7E-04 | 29%            |
| succinate (urine) with fruits                                | 0.015                            | 0.007    | 0.023    | 1.7E-04 | 30%            |
| glutamine (urine) with fruits                                | -0.020                           | -0.028   | -0.013   | 3.4E-07 | 0%             |
| scyllo-inositol (urine) with fruits                          | 0.018                            | 0.011    | 0.025    | 3.0E-07 | 58%            |
| hippurate (urine) with fruits                                | 0.026                            | 0.018    | 0.034    | 4.4E-11 | 50%            |
| 3-aminoisobutyrate (urine) with fruits                       | 0.015                            | 0.007    | 0.023    | 1.9E-04 | 24%            |
| proline betaine (urine) with fruits                          | 0.023                            | 0.015    | 0.031    | 1.5E-08 | 19%            |
| N-methylnicotinic acid (urine) with fruits                   | 0.018                            | 0.010    | 0.026    | 1.6E-05 | 60%            |
| 3-hydroxybutyrate/ 3-aminoisobutyrate (urine) with beverages | -0.034                           | -0.053   | -0.016   | 3.2E-04 | 0%             |
| PC ae C36:3 with meat                                        | 0.024                            | 0.011    | 0.037    | 2.3E-04 | 0%             |
| PC ae C36:4 with meat                                        | 0.031                            | 0.018    | 0.044    | 3.5E-06 | 0%             |
| PC ae C36:5 with meat                                        | 0.026                            | 0.013    | 0.040    | 1.1E-04 | 0%             |
| PC ae C38:5 with meat                                        | 0.027                            | 0.014    | 0.040    | 5.7E-05 | 20%            |
| PC aa C36:0 with fish                                        | 0.091                            | 0.064    | 0.119    | 1.5E-11 | 56%            |
| PC aa C36:5 with fish                                        | 0.063                            | 0.035    | 0.091    | 1.3E-05 | 43%            |
| PC aa C36:6 with fish                                        | 0.087                            | 0.059    | 0.114    | 7.9E-10 | 0%             |
| PC aa C38:0 with fish                                        | 0.108                            | 0.081    | 0.135    | 9.1E-15 | 74%            |
| PC aa C38:6 with fish                                        | 0.113                            | 0.085    | 0.140    | 1.2E-15 | 57%            |
| PC aa C40:1 with fish                                        | 0.055                            | 0.027    | 0.082    | 1.1E-04 | 0%             |
| PC aa C40:4 with fish                                        | -0.057                           | -0.084   | -0.030   | 3.5E-05 | 19%            |
| PC aa C40:6 with fish                                        | 0.100                            | 0.072    | 0.128    | 1.5E-12 | 48%            |
| PC aa C42:0 with fish                                        | 0.052                            | 0.024    | 0.080    | 2.4E-04 | 0%             |
| PC aa C42:2 with fish                                        | 0.057                            | 0.029    | 0.084    | 5.3E-05 | 3%             |
| PC ae C32:2 with fish                                        | 0.047                            | 0.022    | 0.072    | 2.3E-04 | 36%            |
| PC ae C38:0 with fish                                        | 0.086                            | 0.058    | 0.113    | 8.7E-10 | 37%            |
| PC ae C38:6 with fish                                        | 0.074                            | 0.046    | 0.102    | 1.9E-07 | 56%            |
| PC ae C40:6 with fish                                        | 0.087                            | 0.059    | 0.115    | 9.0E-10 | 31%            |
| Gly with dairy                                               | -0.010                           | -0.016   | -0.005   | 2.8E-04 | 31%            |
| PC aa C28:1 with dairy                                       | 0.015                            | 0.010    | 0.020    | 3.5E-08 | 59%            |
| PC aa C30:0 with dairy                                       | 0.012                            | 0.007    | 0.017    | 1.6E-05 | 69%            |
| PC aa C38:0 with dairy                                       | -0.013                           | -0.018   | -0.008   | 2.1E-06 | 0%             |
| PC ae C30:0 with dairy                                       | 0.015                            | 0.009    | 0.020    | 3.0E-08 | 73%            |
| PC ae C38:6 with dairy                                       | -0.010                           | -0.016   | -0.005   | 2.2E-04 | 0%             |
| SM (OH) C14:1 with dairy                                     | 0.013                            | 0.007    | 0.018    | 3.4E-06 | 71%            |
| PC ae C30:0 with potatoes                                    | -0.042                           | -0.064   | -0.020   | 1.7E-04 | 0%             |
| PC ae C34:0 with potatoes                                    | -0.048                           | -0.070   | -0.026   | 1.7E-05 | 29%            |
| SM (OH) C14:1 with potatoes                                  | -0.046                           | -0.067   | -0.024   | 4.0E-05 | 50%            |
| Ac-Orn with fruits                                           | 0.016                            | 0.008    | 0.023    | 7.5E-05 | 0%             |
| PC aa C38:0 with sweets                                      | -0.022                           | -0.032   | -0.012   | 1.3E-05 | 0%             |
| PC aa C38:6 with sweets                                      | -0.022                           | -0.032   | -0.011   | 3.1E-05 | 0%             |
| PC ae C38:5 with sweets                                      | -0.021                           | -0.031   | -0.011   | 2.3E-05 | 23%            |
| PC ae C38:6 with sweets                                      | -0.021                           | -0.031   | -0.011   | 5.2E-05 | 0%             |
| PC ae C40:6 with sweets                                      | -0.023                           | -0.033   | -0.013   | 8.4E-06 | 0%             |
| lysoPC a C17:0 with bakery products                          | -0.026                           | -0.039   | -0.013   | 6.4E-05 | 49%            |
| PC aa C36:6 with bakery products                             | -0.027                           | -0.040   | -0.014   | 4.2E-05 | 0%             |
| PC aa C38:0 with bakery products                             | -0.026                           | -0.039   | -0.014   | 5.0E-05 | 51%            |
| PC aa C38:6 with bakery products                             | -0.027                           | -0.040   | -0.014   | 4.3E-05 | 54%            |
| PC aa C40:6 with bakery products                             | -0.027                           | -0.040   | -0.014   | 4.3E-05 | 41%            |
| PC ae C38:0 with bakery products                             | -0.030                           | -0.042   | -0.017   | 4.5E-06 | 18%            |
| PC ae C38:6 with bakery products                             | -0.025                           | -0.037   | -0.012   | 1.9E-04 | 11%            |
| PC ae C40:2 with bakery products                             | -0.027                           | -0.039   | -0.014   | 4.5E-05 | 53%            |
| PC ae C40:6 with bakery products                             | -0.025                           | -0.038   | -0.013   | 9.5E-05 | 35%            |
| SM (OH) C14:1 with bakery products                           | -0.027                           | -0.039   | -0.014   | 3.6E-05 | 14%            |
| SM (OH) C16:1 with bakery products                           | -0.030                           | -0.042   | -0.018   | 1.6E-06 | 32%            |
| C5:1 with beverages                                          | -0.033                           | -0.050   | -0.015   | 2.1E-04 | 1%             |
| C6:1 with beverages                                          | -0.031                           | -0.047   | -0.015   | 1.6E-04 | 20%            |
